# Supplementary material for: Integrative Analysis of PAIP2B to Identify a Novel Biomarker for Pancreatic Ductal Adenocarcinoma
Source: PubMed Central journal article supplement (PMC10730282; doi:10.1055/s-0043-1777789), 2023-12-19
Supplement: 10-1055-s-0043-1777789-s2300086.pdf [file 10-1055-s-0043-1777789-s2300086.pdf]

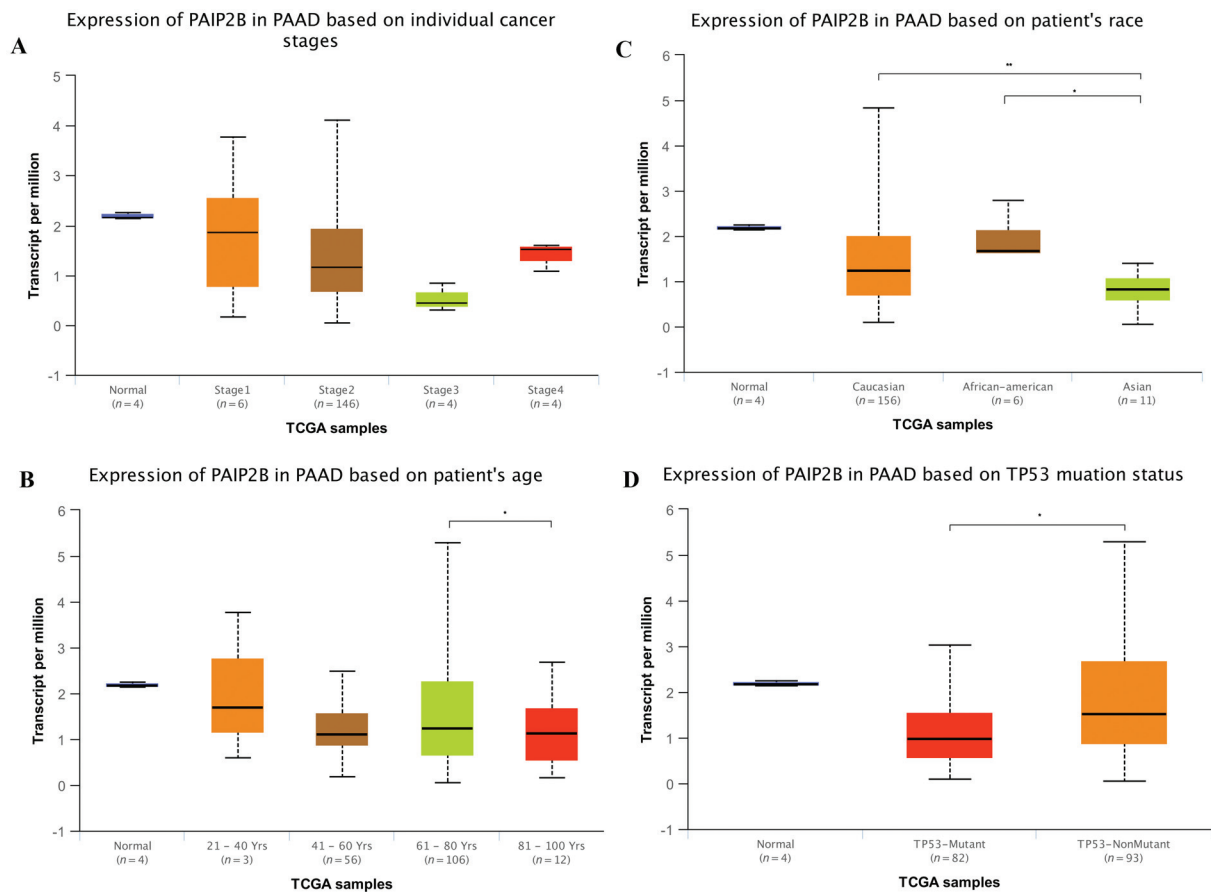

**Supplementary Fig. S1** Correlation between PAIP2B expression and clinical factors. (A) PAIP2B expression in different tumor stages based on UALCAN database. (B) PAIP2B expression at different ages. (C) PAIP2B expression in different races. (D) Correlation between PAIP2B expression and TP53 mutation. PAAD, pancreatic adenocarcinoma; PAIP2B, poly A-binding protein interacting protein 2B; TCGA, The Cancer Genome Atlas.

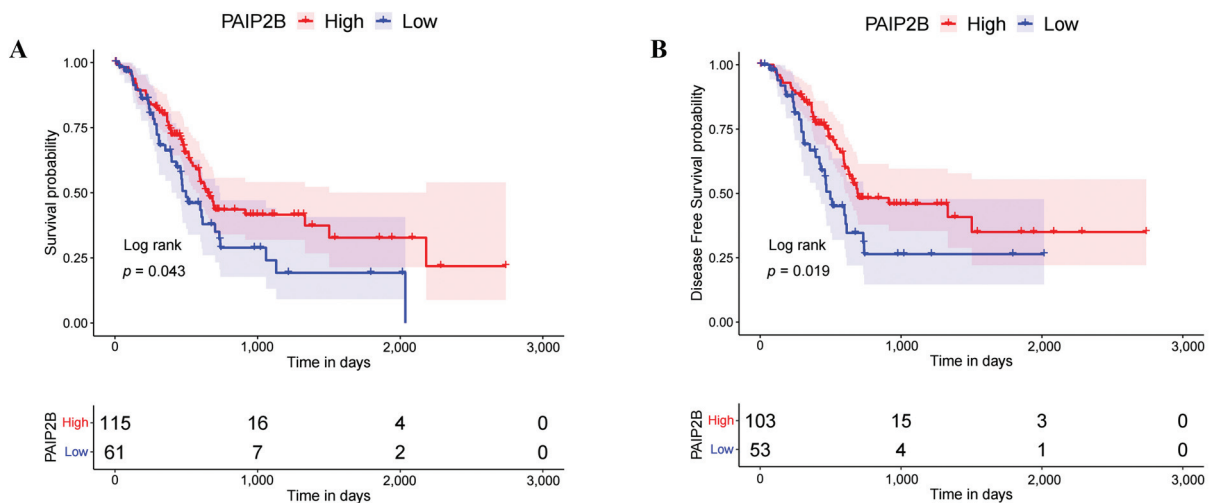

**Supplementary Fig. S2** Correlation with PAIP2B expression and Survival by Kaplan–Meier curve. (A) OS curve between high level and low level group of PAIP2B expression. (B) DFS curve between high level and low level group of PAIP2B expression,  $p$ -value is based on log-rank test. PAIP2B, poly A-binding protein interacting protein 2B; OS, overall survival; DFS, disease-free survival.

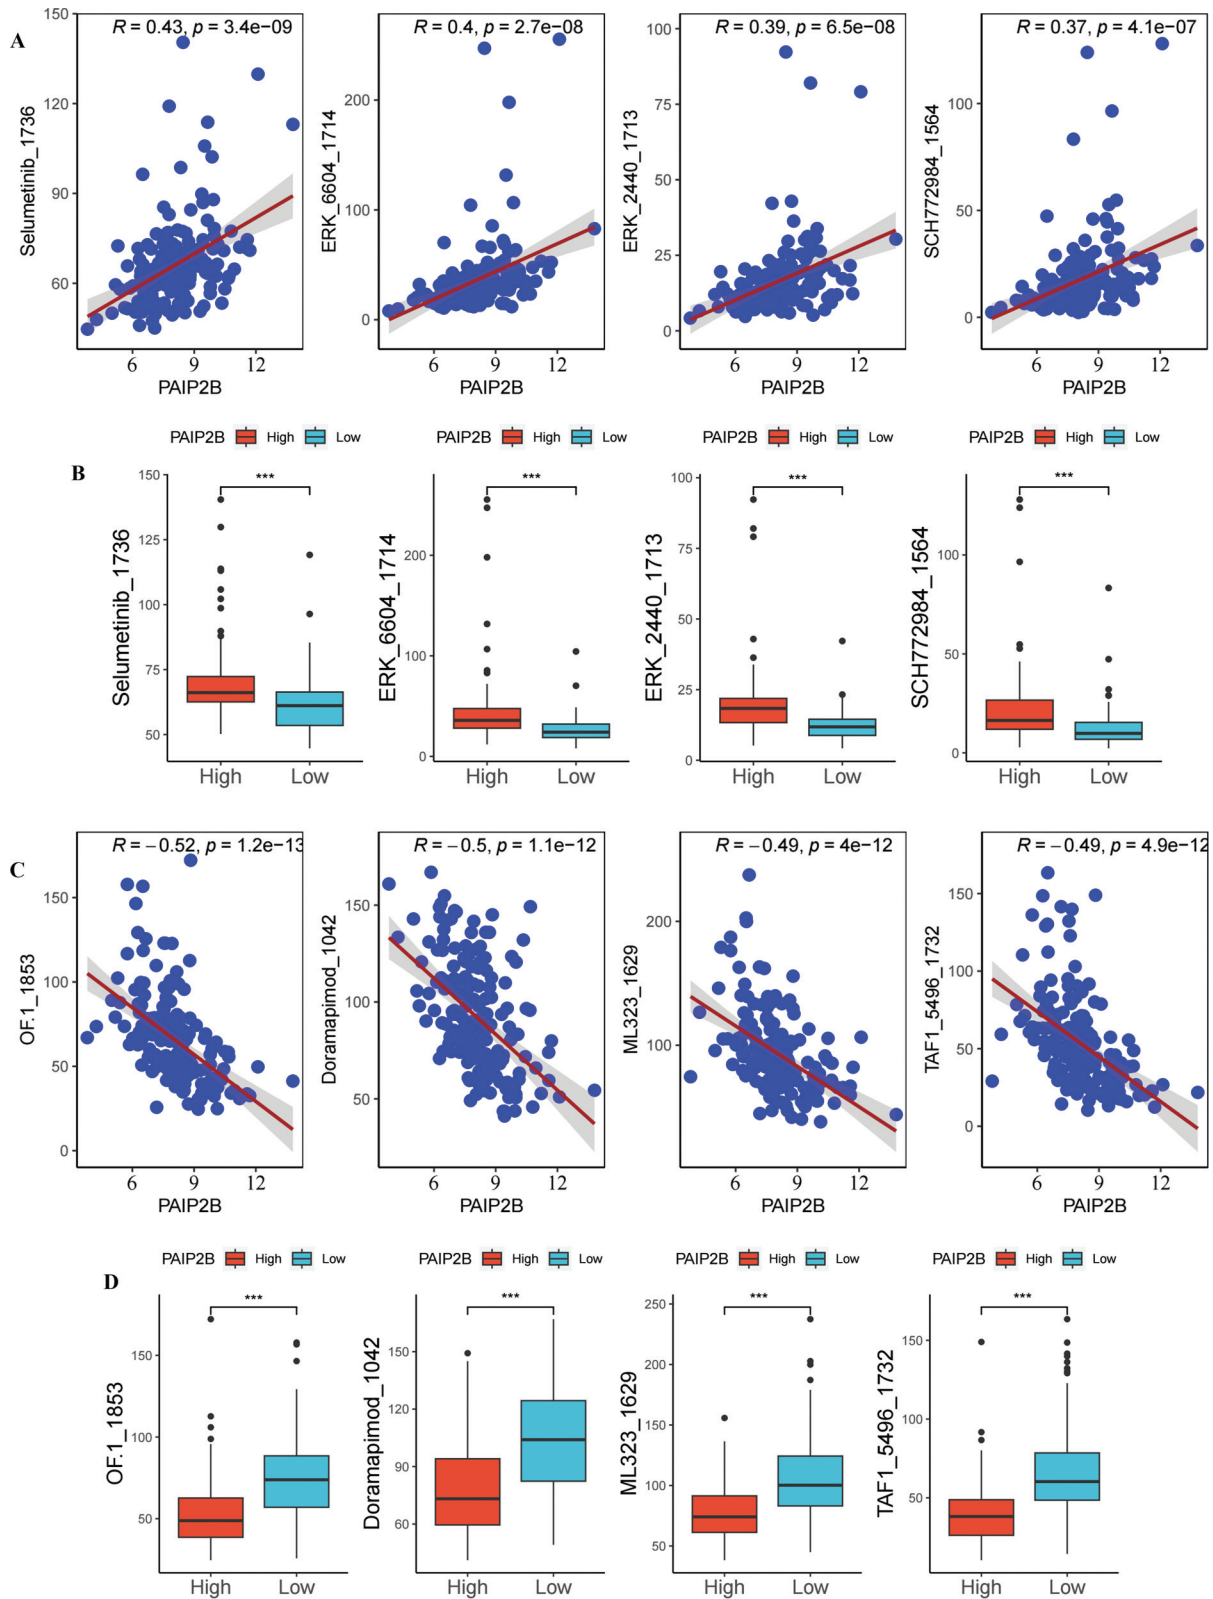

**Supplementary Fig. S3** Correlation between drug efficacy and PAIP2B expression. (A, C) Correlation between the IC<sub>50</sub> value of drugs and PAIP2B. (B, D) IC<sub>50</sub> value of different drugs between high- and low-level groups. PAIP2B, poly A-binding protein interacting protein 2B.

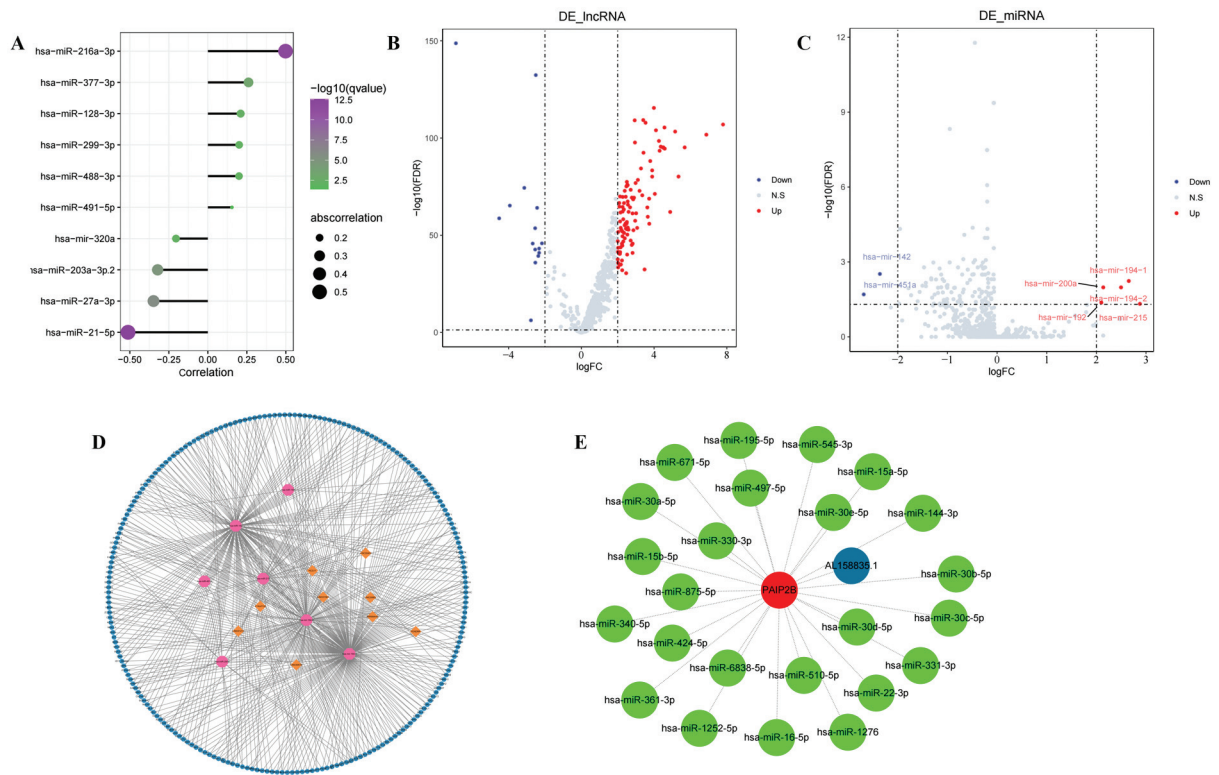

**Supplementary Fig. S4** ceRNA network prediction. (A) Correlation of miRNA with PAIP2B expression. (B) Volcano map of differential lncRNA in PDAC. (C) Volcano map of differential miRNA in PDAC. (D) ceRNA (lncRNA-miRNA-mRNA) network. (E) lncRNA-PAIP2B-miRNA axis. PAIP2B, poly A-binding protein interacting protein 2B; PDAC, pancreatic ductal adenocarcinoma.

**Supplementary Table S1** KEGG and GO enrichment analyses

| Ontology | ID         | Description                  | GeneRatio | BgRatio    | p-Value  | p.adjust | q-Value  | geneID                                                                                                                                                                                                                                                                                                                                                                                                                                                  | Count |
|----------|------------|------------------------------|-----------|------------|----------|----------|----------|---------------------------------------------------------------------------------------------------------------------------------------------------------------------------------------------------------------------------------------------------------------------------------------------------------------------------------------------------------------------------------------------------------------------------------------------------------|-------|
| BP       | GO:0023061 | Signal release               | 73/917    | 451/18,800 | 8.32E-20 | 3.85E-16 | 3.31E-16 | MYRIP/BRSK2/CELA2A/CHRN3/P2RX1/SYT6/NLGN1/KCNA2/GLPD1/VIP/ABAT/ADCY1/CARTPT/TACR1/CACNB2/KCNB1/SLC6A4/NRXN1/PCLO/GALR1/CLTRN/CHRN2/GHRL/ADCYAP1/GRIK5/SYT4/CRHBP/GPR27/SFRP1/UNC13A/CADPS/LRRK2/NKX6-1/KCNJ11/SPINK1/SYP/SOX11/NEUROD1/SYT9/CPE/NROB2/KCNA5/CXCL12/CNR1/RIMS2/SNAP25/RIMS1/PRKCB/CASR/RFX6/ZBED6/ABCC8/TRPV6/SCG5/FGA/CPLX2/EPHA5/CFTR/GCK/SYT5/NR1H4/ADIPOQ/FGB/CHGA/PTPRN/G6PC2/SLC30A8/FFAR1/UCN3/GRM4/SYT8/BLK/FGG                  | 73    |
| BP       | GO:0010817 | Regulation of hormone levels | 74/917    | 496/18,800 | 5.32E-18 | 1.23E-14 | 1.06E-14 | MYRIP/BRSK2/CELA2A/SCNN1B/GCNT4/PNLIP/MBOAT4/GLPD1/CHST9/CMA1/VIP/ABAT/CARTPT/TACR1/KCNB1/ADH1A/SLCO1C1/PCLO/GALR1/CLTRN/GHRL/ADCYAP1/ADH1B/CTSG/CRHBP/GPR27/SFRP1/SERPINA7/NKX6-1/KCNJ11/HPN/SPINK1/PCSK1/UGT2B15/SOX11/NEUROD1/SYT9/TPO/PRLHR/SLC22A9/CPE/NROB2/KCNA5/UGT2B11/CYP2C8/CNR1/RIMS2/DUOXA1/SNAP25/PCSK2/CASR/RFX6/ZBED6/ABCC8/TRPV6/SCG5/FGA/EPHA5/CFTR/GCK/NR1H4/ADIPOQ/FGB/CHGA/BMP5/TTR/PTPRN/G6PC2/UGT2B17/SLC30A8/FFAR1/UCN3/BLK/FGG | 74    |
| BP       | GO:0009914 | Hormone transport            | 54/917    | 290/18,800 | 1.16E-17 | 1.78E-14 | 1.53E-14 | MYRIP/BRSK2/CELA2A/GLPD1/VIP/ABAT/CARTPT/TACR1/KCNB1/SLCO1C1/PCLO/GALR1/CLTRN/GHRL/ADCYAP1/CRHBP/GPR27/SFRP1/SERPINA7/NKX6-1/KCNJ11/SPINK1/SOX11/NEUROD1/SYT9/SLC22A9/CPE/NROB2/KCNA5/CNR1/RIMS2/SNAP25/CASR/RFX6/ZBED6/ABCC8/TRPV6/SCG5/FGA/EPHA5/CFTR/GCK/NR1H4/ADIPOQ/FGB/CHGA/TTR/PTPRN/G6PC2/SLC30A8/FFAR1/UCN3/BLK/FGG                                                                                                                            | 54    |
| BP       | GO:0030072 | Peptide hormone secretion    | 44/917    | 220/18,800 | 8.26E-16 | 9.56E-13 | 8.22E-13 | MYRIP/BRSK2/CELA2A/GLPD1/VIP/ABAT/CARTPT/KCNB1/PCLO/CLTRN/GHRL/ADCYAP1/CRHBP/GPR27/SFRP1/NKX6-1/KCNJ11/SPINK1/NEUROD1/SYT9/CPE/NROB2/KCNA5/CNR1/RIMS2/SNAP25/CASR/RFX6/ZBED6/ABCC8/FGA/EPHA5/CFTR/GCK/NR1H4/FGB/CHGA/PTPRN/G6PC2/SLC30A8/FFAR1/UCN3/BLK/FGG                                                                                                                                                                                             | 44    |
| BP       | GO:0046879 | Hormone secretion            | 50/917    | 281/18,800 | 1.30E-15 | 1.20E-12 | 1.03E-12 | MYRIP/BRSK2/CELA2A/GLPD1/VIP/ABAT/CARTPT/TACR1/KCNB1/PCLO/GALR1/CLTRN/GHRL/ADCYAP1/CRHBP/GPR27/SFRP1/NKX6-1/KCNJ11/SPINK1/SOX11/NEUROD1/SYT9/CPE/NROB2/KCNA5/CNR1/RIMS2/SNAP25/CASR/RFX6/ZBED6/ABCC8/TRPV6/SCG5/FGA/EPHA5/CFTR/GCK/NR1H4/ADIPOQ/FGB/CHGA/PTPRN/G6PC2/SLC30A8/FFAR1/UCN3/BLK/FGG                                                                                                                                                         | 50    |

(Continued)

Supplementary Table S1 (Continued)

| Ontology | ID         | Description                                                    | GeneRatio | BgRatio    | p-Value  | p.adjust | q-Value  | geneID                                                                                                                                                                                                                                                                                                                                                                                | Count |
|----------|------------|----------------------------------------------------------------|-----------|------------|----------|----------|----------|---------------------------------------------------------------------------------------------------------------------------------------------------------------------------------------------------------------------------------------------------------------------------------------------------------------------------------------------------------------------------------------|-------|
| BP       | GO:0002790 | Peptide secretion                                              | 44/917    | 225/18,800 | 1.96E-15 | 1.51E-12 | 1.30E-12 | MYRIP/BRISK2/CELA2A/GLPD1/VIP/ABAT/CARTPT/KCNB1/PCLO/CLTRN/GHRL/ADCYAP1/CRHBP/GPR27/SFRP1/NKX6-1/KCNJ11/SPINK1/NEUROD1/SYT9/CPE/NROB2/KCNA5/CNR1/RIMS2/SNAP25/CASR/RFX6/ZBED6/ABCC8/FGA/EPHA5/CFTR/GCK/NR1H4/FGB/CHGA/PTPRN/G6PC2/SLC30A8/FFAR1/UCN3/BLK/FGG                                                                                                                          | 44    |
| BP       | GO:0006958 | Complement activation, classical pathway                       | 30/917    | 108/18,800 | 3.21E-15 | 2.12E-12 | 1.83E-12 | C5/CLU/C6/C7/C8A/IGHV3-64/C4BPA/IGHV6-1/IGHV2-5/IGHV3-74/IGHV4-4/IGHV3-20/IGHV3-7/IGHV3-15/IGHV1-45/IGHV3-72/IGHV3-48/APCS/IGHV2-26/IGHV3-49/IGHV4-28/IGHV5-51/CRP/IGHV1-69/IGHV4-39/IGHV4-59/IGHA2/IGHV3-21/IGHV3-13/IGHV1-18                                                                                                                                                        | 30    |
| BP       | GO:0090276 | Regulation of peptide hormone secretion                        | 38/917    | 177/18,800 | 7.08E-15 | 4.09E-12 | 3.52E-12 | MYRIP/BRISK2/CELA2A/GLPD1/ABAT/CARTPT/KCNB1/GHRL/ADCYAP1/CRHBP/GPR27/SFRP1/NKX6-1/KCNJ11/SPINK1/NEUROD1/SYT9/NROB2/KCNA5/CNR1/SNAP25/CASR/RFX6/ZBED6/ABCC8/FGA/EPHA5/CFTR/GCK/NR1H4/FGB/CHGA/G6PC2/SLC30A8/FFAR1/UCN3/BLK/FGG                                                                                                                                                         | 38    |
| BP       | GO:0042391 | Regulation of membrane potential                               | 62/917    | 425/18,800 | 8.54E-15 | 4.39E-12 | 3.78E-12 | NRCAM/CHRN3/KCNK3/NTRK2/P2RX1/KCNJ5/NLGN1/KCNA2/AKAP6/BNIP3/RELN/FGF12/CD36/GABRB3/ABAT/STOX1/KCNH7/SLC8A3/SLC8A2/TACR1/SCN3A/DMD/CACNB2/KCNB1/SLC8A1/NRXN1/SCN4A/KCND3/SLC4A4/CHRN2/CELF4/GHRL/GRIK5/MAPT/ANK2/LRRK2/RGS7BP/KCNJ11/SCN3B/SCN7A/MAPK8IP2/GLRA3/CBLN1/ATP1A3/KCNA5/KCNJ3/KCNMB2/HCN4/CNR1/RIMS2/RIMS1/MYOC/GABRA4/GABRG2/SEZ6/KCNH6/CFTR/GJD2/GLRA1/KCNK16/GABRA2/UCN3 | 62    |
| BP       | GO:0002791 | Regulation of peptide secretion                                | 38/917    | 180/18,800 | 1.26E-14 | 5.47E-12 | 4.71E-12 | MYRIP/BRISK2/CELA2A/GLPD1/ABAT/CARTPT/KCNB1/GHRL/ADCYAP1/CRHBP/GPR27/SFRP1/NKX6-1/KCNJ11/SPINK1/NEUROD1/SYT9/NROB2/KCNA5/CNR1/SNAP25/CASR/RFX6/ZBED6/ABCC8/FGA/EPHA5/CFTR/GCK/NR1H4/FGB/CHGA/G6PC2/SLC30A8/FFAR1/UCN3/BLK/FGG                                                                                                                                                         | 38    |
| BP       | GO:0002455 | Humoral immune response mediated by circulating immunoglobulin | 31/917    | 121/18,800 | 1.30E-14 | 5.47E-12 | 4.71E-12 | C5/CLU/C6/C7/C8A/IGHV3-64/PTPRC/C4BPA/IGHV6-1/IGHV2-5/IGHV3-74/IGHV4-4/IGHV3-20/IGHV3-7/IGHV3-15/IGHV1-45/IGHV3-72/IGHV3-48/APCS/IGHV2-26/IGHV3-49/IGHV4-28/IGHV5-51/CRP/IGHV1-69/IGHV4-39/IGHV4-59/IGHA2/IGHV3-21/IGHV3-13/IGHV1-18                                                                                                                                                  | 31    |

**Supplementary Table S1** (Continued)

| Ontology | ID         | Description                                                   | GeneRatio | BgRatio    | p-Value  | p.adjust | q-Value  | geneID                                                                                                                                                                                                                                                                                                               | Count |
|----------|------------|---------------------------------------------------------------|-----------|------------|----------|----------|----------|----------------------------------------------------------------------------------------------------------------------------------------------------------------------------------------------------------------------------------------------------------------------------------------------------------------------|-------|
| BP       | GO:0006956 | Complement activation                                         | 32/917    | 131/18,800 | 2.10E-14 | 7.86E-12 | 6.76E-12 | C5/CLU/C6/C7/FCN2/C8A/IGHV3-64/C4BPA/IGHV6-1/IGHV2-5/IGHV3-74/IGHV4-4/IGHV3-20/KRT1/IGHV3-7/IGHV3-15/IGHV1-45/IGHV3-72/IGHV3-48/APCS/IGHV2-26/IGHV3-49/IGHV4-28/IGHV5-51/CRP/IGHV1-69/IGHV4-39/IGHV4-59/IGHA2/IGHV3-21/IGHV3-13/IGHV1-18                                                                             | 32    |
| BP       | GO:0090087 | Regulation of peptide transport                               | 38/917    | 183/18,800 | 2.21E-14 | 7.86E-12 | 6.76E-12 | MYRIP/BRSK2/CELA2A/GLPD1/ABAT/CARTPT/KCNB1/GHRL/ADCYAP1/CRHBP/GPR27/SFRP1/NKX6-1/KCNJ11/SPINK1/NEUROD1/SYT9/NROB2/KCNA5/CNR1/SNAP25/CASR/RFX6/ZBED6/ABCC8/FGA/EPHA5/CFTR/GCK/NR1H4/FGB/CHGA/G6PC2/SLC30A8/FFAR1/UCN3/BLK/FGG                                                                                         | 38    |
| BP       | GO:0046883 | Regulation of hormone secretion                               | 43/917    | 231/18,800 | 2.55E-14 | 8.44E-12 | 7.26E-12 | MYRIP/BRSK2/CELA2A/GLPD1/ABAT/CARTPT/TACR1/KCNB1/GALR1/GHRL/ADCYAP1/CRHBP/GPR27/SFRP1/NKX6-1/KCNJ11/SPINK1/SOX11/NEUROD1/SYT9/NROB2/KCNA5/CNR1/SNAP25/CASR/RFX6/ZBED6/ABCC8/SCG5/FGA/EPHA5/CFTR/GCK/NR1H4/ADIPOQ/FGB/CHGA/G6PC2/SLC30A8/FFAR1/UCN3/BLK/FGG                                                           | 43    |
| BP       | GO:0035592 | Establishment of protein localization to extracellular region | 54/917    | 351/18,800 | 5.30E-14 | 1.63E-11 | 1.41E-11 | SEL1L/MYRIP/BRSK2/PLA2G1B/CELA2A/GLPD1/RAB3C/VIP/ABAT/CARTPT/KCNB1/PCLO/CLTRN/GHRL/ADCYAP1/SYT4/GPR27/SFRP1/NKX6-1/KCNJ11/PCSK1/STXBP5L/AFM/NEUROD1/SYT9/CBLN1/NROB2/KCNA5/CNR1/RIMS2/SNAP25/CASR/RFX6/ZBED6/SCG2/ABCC8/FGA/CBLN4/EPHA5/CFTR/GCK/NR1H4/IGF1/FGB/CHGA/PTPRN/G6PC2/SLC30A8/PPY/MTPP/FFAR1/UCN3/BLK/FGG | 54    |
| BP       | GO:0030073 | Insulin secretion                                             | 37/917    | 179/18,800 | 5.65E-14 | 1.64E-11 | 1.41E-11 | MYRIP/BRSK2/CELA2A/GLPD1/ABAT/CARTPT/KCNB1/PCLO/CLTRN/GHRL/ADCYAP1/GPR27/SFRP1/NKX6-1/KCNJ11/NEUROD1/SYT9/NROB2/KCNA5/CNR1/RIMS2/SNAP25/CASR/RFX6/ZBED6/ABCC8/EPHA5/CFTR/GCK/NR1H4/CHGA/PTPRN/G6PC2/SLC30A8/FFAR1/UCN3/BLK                                                                                           | 37    |
| BP       | GO:0015833 | Peptide transport                                             | 44/917    | 249/18,800 | 8.77E-14 | 2.39E-11 | 2.05E-11 | MYRIP/BRSK2/CELA2A/GLPD1/VIP/ABAT/CARTPT/KCNB1/PCLO/CLTRN/GHRL/ADCYAP1/CRHBP/GPR27/SFRP1/NKX6-1/KCNJ11/SPINK1/NEUROD1/SYT9/CPE/NROB2/KCNA5/CNR1/RIMS2/SNAP25/CASR/RFX6/ZBED6/ABCC8/FGA/EPHA5/CFTR/GCK/NR1H4/FGB/CHGA/PTPRN/G6PC2/SLC30A8/FFAR1/UCN3/BLK/FGG                                                          | 44    |

(Continued)



Supplementary Table S1 (Continued)

| Ontology | ID         | Description                                  | GeneRatio | BgRatio    | p-Value  | p.adjust | q-Value  | geneID                                                                                                                                                                                                                                                                                                                                      | Count |
|----------|------------|----------------------------------------------|-----------|------------|----------|----------|----------|---------------------------------------------------------------------------------------------------------------------------------------------------------------------------------------------------------------------------------------------------------------------------------------------------------------------------------------------|-------|
| BP       | GO:0071692 | Protein localization to extracellular region | 54/917    | 359/18,800 | 1.36E-13 | 3.50E-11 | 3.01E-11 | SEL1L/MYRIP/BRSK2/PLA2G1B/CELA2A/GLPD1/RAB3C/VIP/ABAT/CARTPT/KCNB1/PCLO/CLTRN/GHRL/ADCYAP1/SYT4/GPR27/SFRP1/NKX6-1/KCNJ11/PCSK1/STXBPL/AFM/NEUROD1/SYT9/CBLN1/NROB2/KCNA5/CNR1/RIMS2/SNAP25/CASR/RFX6/ZBED6/SCG2/ABCC8/FGA/CBLN4/EPHA5/CFTR/GCK/NR1H4/IGF1/FGF/CHGA/PTPRN/G6PC2/SLC30A8/PPY/MTTP/FFAR1/UCN3/BLK/FGG                         | 54    |
| BP       | GO:0009306 | Protein secretion                            | 53/917    | 350/18,800 | 1.75E-13 | 4.27E-11 | 3.67E-11 | SEL1L/MYRIP/BRSK2/PLA2G1B/CELA2A/GLPD1/RAB3C/VIP/ABAT/CARTPT/KCNB1/PCLO/CLTRN/GHRL/ADCYAP1/SYT4/GPR27/SFRP1/NKX6-1/KCNJ11/PCSK1/STXBPL/NEUROD1/SYT9/CBLN1/NROB2/KCNA5/CNR1/RIMS2/SNAP25/CASR/RFX6/ZBED6/SCG2/ABCC8/FGA/CBLN4/EPHA5/CFTR/GCK/NR1H4/IGF1/FGF/CHGA/PTPRN/G6PC2/SLC30A8/PPY/MTTP/FFAR1/UCN3/BLK/FGG                             | 53    |
| BP       | GO:0050796 | Regulation of insulin secretion              | 32/917    | 147/18,800 | 6.45E-13 | 1.47E-10 | 1.27E-10 | MYRIP/BRSK2/CELA2A/GLPD1/ABAT/CARTPT/KCNB1/GHRL/GPR27/SFRP1/NKX6-1/KCNJ11/NEUROD1/SYT9/NROB2/KCNA5/CNR1/SNAP25/CASR/RFX6/ZBED6/ABCC8/EPHA5/CFTR/GCK/NR1H4/CHGA/G6PC2/SLC30A8/FFAR1/UCN3/BLK                                                                                                                                                 | 32    |
| BP       | GO:0006959 | Humoral immune response                      | 49/917    | 317/18,800 | 6.68E-13 | 1.47E-10 | 1.27E-10 | C5/PLA2G1B/CLU/REG3G/C6/REG1B/REG3A/C7/PRSS2/FCN2/REG1A/CTSG/CCR2/C8A/IGHV3-64/PTPRC/C4BPA/FGA/IGHV6-1/IGHV2-5/IGHV3-74/SH2D1A/PRSS3/IGHV4-4/FGF/IGHV3-20/KRT1/IGHV3-7/IGHV3-15/IGHV1-45/CXCL9/JCHAIN/IGHV3-72/IGHV3-48/APCS/IGHV2-26/IGHV3-49/IGHV4-28/MS4A1/IGHV5-51/CRP/IGHV1-69/IGHV4-39/PAX5/IGHV4-59/IGHA2/IGHV3-21/IGHV3-13/IGHV1-18 | 49    |
| BP       | GO:0042886 | Amide transport                              | 46/917    | 287/18,800 | 9.21E-13 | 1.94E-10 | 1.66E-10 | MYRIP/BRSK2/CELA2A/ABC1/GLPD1/VIP/ABAT/CARTPT/KCNB1/PCLO/CLTRN/GHRL/ADCYAP1/CRHBP/GPR27/SFRP1/NKX6-1/KCNJ11/SPINK1/NEUROD1/SYT9/CPE/NROB2/KCNA5/CNR1/RIMS2/SNAP25/CASR/RFX6/ZBED6/ABCC8/FGA/EPHA5/CFTR/GCK/NR1H4/FGF/CHGA/PTPRN/G6PC2/SLC30A8/MTTP/FFAR1/UCN3/BLK/FGG                                                                       | 46    |
| BP       | GO:0006910 | Phagocytosis, recognition                    | 26/917    | 102/18,800 | 2.02E-12 | 4.06E-10 | 3.49E-10 | CD36/FCN2/IGHV3-64/C4BPA/IGHV6-1/IGHV2-5/IGHV3-74/IGHV4-4/IGHV3-20/IGHV3-7/IGHV3-15/IGHV1-45/IGHV3-72/IGHV3-48/IGHV2-26/IGHV3-49/IGHV4-28/IGHV5-51/CRP/IGHV1-69/IGHV4-39/IGHV4-59/IGHA2/IGHV3-21/IGHV3-13/IGHV1-18                                                                                                                          | 26    |

**Supplementary Table S1** (Continued)

| Ontology | ID         | Description                                    | GeneRatio | BgRatio    | p-Value  | p.adjust | q-Value  | geneID                                                                                                                                                                                                                                                                                                                                                                                         | Count |
|----------|------------|------------------------------------------------|-----------|------------|----------|----------|----------|------------------------------------------------------------------------------------------------------------------------------------------------------------------------------------------------------------------------------------------------------------------------------------------------------------------------------------------------------------------------------------------------|-------|
| BP       | GO:0072503 | Cellular divalent inorganic cation homeostasis | 63/917    | 494/18,800 | 2.54E-12 | 4.90E-10 | 4.21E-10 | PLA2G1B/KCNK3/MT1F/CTRC/P2RX1/CX3CR1/NOS1/AKAP6/BNIP3/CD36/RGN/EPO/SLC8A3/SLC8A2/TACR1/DMD/SLC30A2/CACNB2/RIC3/SLC8A1/PTGFR/MT1G/FASLG/GALR1/CYSLTR1/GHRL/ADCYAP1/ATP2B2/ANK2/CCR2/MCOLN3/CCKBR/SPINK1/CCL14/GPR174/SCGN/CXCR6/CACNA1B/CCR5/AVPR1B/KCNA5/CXCL12/CNR1/GPR18/PRKCB/LPAR3/MT1H/CASR/PTPRC/TRPV6/GLP1R/PKHD1/ATP13A4/SLC39A5/XCR1/CCL21/CXCR5/CXCL9/SLC30A8/FFAR1/MS4A1/IAPP/CCL19 | 63    |
| BP       | GO:0050808 | Synapse organization                           | 56/917    | 419/18,800 | 6.68E-12 | 1.24E-09 | 1.06E-09 | ERBB4/NRCAM/CTTNBP2/SYBU/CEL/NTRK2/CTNND2/AMIGO1/NLGN1/RAB39B/CX3CR1/PAK3/RELN/KIF1A/GABRB3/CNKSR2/ADGRB3/SLC8A3/SLC8A2/CACNB2/NFASC/SDK1/FLRT2/BSN/NRXN1/TNR/PCDHB5/PCLO/NEURL1/LRRTM2/CHRN2/GHRL/SLITRK1/MUSK/MAPT/SEMA3E/UNC13A/LRRK2/CNTN2/C1QL3/DSCAM/INA/CBLN1/CTNNA2/IGFN1/ITPKA/GABRG2/GPM6A/SEZ6/CBLN4/CAMK2B/CNTN5/GABRA2/LHFPL4/CLK8/LRRTM3                                         | 56    |
| BP       | GO:0001508 | Action potential                               | 30/917    | 143/18,800 | 9.23E-12 | 1.64E-09 | 1.41E-09 | NRCAM/NTRK2/P2RX1/KCNJ5/KCNA2/AKAP6/FGF12/CD36/KCNH7/SLC8A2/TACR1/SCN3A/DMD/CACNB2/KCNB1/SLC8A1/SCN4A/KCND3/CHRN2/ANK2/SCN3B/SCN7A/KCNA5/KCNJ3/KCNMB2/HCN4/CNR1/KCNH6/GJD2/GLRA1                                                                                                                                                                                                               | 30    |
| BP       | GO:0055074 | Calcium ion homeostasis                        | 59/917    | 468/18,800 | 2.07E-11 | 3.55E-09 | 3.05E-09 | PLA2G1B/KCNK3/CTRC/P2RX1/CX3CR1/NOS1/AKAP6/BNIP3/KL/CD36/RGN/EPO/SLC8A3/SLC8A2/TACR1/DMD/CACNB2/RIC3/SLC8A1/PTGFR/FASLG/GALR1/CYSLTR1/GHRL/ADCYAP1/ATP2B2/ANK2/CCR2/MCOLN3/CCKBR/SPINK1/CCL14/GPR174/SCGN/CXCR6/CACNA1B/CCR5/AVPR1B/KCNA5/CXCL12/CNR1/GPR18/PRKCB/LPAR3/CASR/PTPRC/TRPV6/GLP1R/PKHD1/ATP13A4/XCR1/CCL21/CXCR5/CXCL9/S100A14/FFAR1/MS4A1/IAPP/CCL19                             | 59    |
| BP       | GO:0006836 | Neurotransmitter transport                     | 36/917    | 207/18,800 | 2.58E-11 | 4.27E-09 | 3.67E-09 | SLC1A2/CHRN3/P2RX1/NLGN1/NOS1/SV2B/SLC6A16/ADCY1/CACNB2/SLC5A7/SLC6A4/NRXN1/PCLO/GRIK5/SYT4/SLC18A3/UNC13A/CADPS/SLC6A15/LRRK2/SLC29A4/SYP/SYT9/SLC18A2/CHAT/CNR1/RIMS2/SNAP25/RIMS1/PRKCB/CPLX2/SYT5/SLC6A17/GABRA2/GRM4/SYT8                                                                                                                                                                 | 36    |

(Continued)



**Supplementary Table S1** (Continued)

| Ontology | ID         | Description                                  | GeneRatio | BgRatio    | p-Value  | p.adjust | q-Value  | geneID                                                                                                                                                                                                                                                                                                                                                  | Count |
|----------|------------|----------------------------------------------|-----------|------------|----------|----------|----------|---------------------------------------------------------------------------------------------------------------------------------------------------------------------------------------------------------------------------------------------------------------------------------------------------------------------------------------------------------|-------|
| BP       | GO:0050708 | Regulation of protein secretion              | 40/917    | 252/18,800 | 3.88E-11 | 6.13E-09 | 5.27E-09 | MYRIP/BRSK2/PLA2G1B/CELA2A/GLPD1/ABAT/CARTPT/KCNB1/GHRL/SYT4/GPR27/SFRP1/NKX6-1/KCNJ11/PCSK1/STXBP5L/NEUROD1/SYT9/NROB2/KCNA5/CNR1/SNAP25/CASR/RFX6/ZBED6/ABCC8/FGA/EPHA5/CFTR/GCK/NR1H4/IGF1/FGB/CHGA/G6PC2/SLC30A8/FFAR1/UCN3/BLK/FGG                                                                                                                 | 40    |
| BP       | GO:1903532 | Positive regulation of secretion by cell     | 42/917    | 274/18,800 | 3.97E-11 | 6.13E-09 | 5.27E-09 | MYRIP/PLA2G1B/NLGN1/GLPD1/VIP/ABAT/CARTPT/TACR1/CACNB2/KCNB1/SLC6A4/SCAMP5/GALR1/CHRN2/GHRL/ADCYAP1/SYT4/GPR27/CADPS/NKX6-1/SPINK1/PCSK1/SOX11/SYT9/NROB2/AVPR1B/CXCL12/CNR1/CASR/RFX6/FGA/CFTR/GCK/NR1H4/IGF1/FGB/CDK5R2/SLC30A8/FFAR1/UCN3/BLK/FGG                                                                                                    | 42    |
| BP       | GO:0006874 | Cellular calcium ion homeostasis             | 57/917    | 456/18,800 | 6.42E-11 | 9.59E-09 | 8.24E-09 | PLA2G1B/KCNK3/CTRC/P2RX1/CX3CR1/NOS1/AKAP6/BNIP3/CD36/RGN/EPO/SLC8A3/SLC8A2/TACR1/DMD/CACNB2/RIC3/SLC8A1/PTGFR/FASLG/GALR1/CYSLTR1/GHRL/ADCYAP1/ATP2B2/ANK2/CCR2/MCOLN3/CCKBR/SPINK1/CCL14/GPR174/SCGN/CXCR6/CACNA1B/CCR5/AVPR1B/KCNA5/CXCL12/CNR1/GPR18/PRKCB/LPAR3/CASR/PTPRC/TRPV6/GLP1R/PKHD1/ATP13A4/XCR1/CCL21/CXCR5/CXCL9/FFAR1/MS4A1/IAPP/CCL19 | 57    |
| BP       | GO:0008037 | Cell recognition                             | 37/917    | 228/18,800 | 1.10E-10 | 1.59E-08 | 1.36E-08 | NRCAM/AMIGO1/CD36/DSCAML1/CLGN/FCN2/CNTN2/DSCAM/CNR1/IGHV3-64/SPACA3/C4BPA/IGHV6-1/IGHV2-5/IGHV3-74/IGHV4-4/IGHV3-20/IGHV3-7/IGHV3-15/CCL21/IGHV1-45/IGHV3-72/IGHV3-48/PAEP/IGHV2-26/IGHV3-49/IGHV4-28/IGHV5-51/CRP/IGHV1-69/IGHV4-39/IGHV4-59/IGHA2/IGHV3-21/IGHV3-13/CCL19/IGHV1-18                                                                   | 37    |
| BP       | GO:0050853 | B-cell receptor signaling pathway            | 27/917    | 131/18,800 | 1.54E-10 | 2.14E-08 | 1.84E-08 | VAV3/PRKCB/IGHV3-64/PTPRC/IGHV6-1/IGHV2-5/IGHV3-74/IGHV4-4/IGHV3-20/IGHV3-7/IGHV3-15/IGHV1-45/IGHV3-72/IGHV3-48/IGHV2-26/IGHV3-49/IGHV4-28/MS4A1/IGHV5-51/IGHV1-69/IGHV4-39/IGHV4-59/BLK/IGHA2/IGHV3-21/IGHV3-13/IGHV1-18                                                                                                                               | 27    |
| BP       | GO:0050804 | Modulation of chemical synaptic transmission | 54/917    | 429/18,800 | 1.59E-10 | 2.14E-08 | 1.84E-08 | PRKAR2B/CEL/CHRN3/NTRK2/P2RX1/NLGN1/CX3CR1/RELN/AKAP7/ADCY1/SLC8A3/SLC8A2/TACR1/CACNB2/KCNB1/SLC6A4/NRXN1/TNR/NPY5R/PHF24/NEURL1/LRRTM2/KIT/CHRN2/CELF4/SLC4A10/GHRL/GRIK5/FAM107A/SYT4/MAPT                                                                                                                                                            | 54    |

**Supplementary Table S1** (Continued)

| Ontology | ID         | Description                                                | GeneRatio | BgRatio    | p-Value  | p.adjust | q-Value  | geneID                                                                                                                                                                                                                                                                                                                                      | Count |
|----------|------------|------------------------------------------------------------|-----------|------------|----------|----------|----------|---------------------------------------------------------------------------------------------------------------------------------------------------------------------------------------------------------------------------------------------------------------------------------------------------------------------------------------------|-------|
|          |            |                                                            |           |            |          |          |          | UNC13A/CCR2/LRRK2/CNTN2/SHISA9/SYP/SCGN/MAPK8IP2/ELAVL4/CBLN1/CACNA1B/CACNG5/CNR1/RIMS2/SNAP25/RIMS1/PRKCB/ITPKA/CPLX2/ADIPOQ/CAMK2B/GRM4/SCTR                                                                                                                                                                                              |       |
| BP       | GO:0051480 | Regulation of cytosolic calcium ion concentration          | 48/917    | 356/18,800 | 1.62E-10 | 2.14E-08 | 1.84E-08 | PLA2G1B/KCNK3/P2RX1/CX3CR1/NOS1/AKAP6/CD36/EPO/SLC8A3/SLC8A2/TACR1/DMD/CACNB2/RIC3/SLC8A1/PTGFR/FASLG/GALR1/CYSLTR1/GHRL/ADCYAP1/ATP2B2/ANK2/CCR2/MCOLN3/CCKBR/SPINK1/GPR174/SCGN/CXCR6/CACNA1B/CCR5/AVPR1B/KCNA5/CNR1/GPR18/LPAR3/PTPRC/TRPV6/GLP1R/XCR1/CCL21/CXCR5/CXCL9/FFAR1/MS4A1/IAPP/CCL19                                          | 48    |
| BP       | GO:0099177 | Regulation of trans-synaptic signaling                     | 54/917    | 430/18,800 | 1.74E-10 | 2.23E-08 | 1.92E-08 | PRKAR2B/CEL/CHRN3/NTRK2/P2RX1/NLGN1/CX3CR1/RELN/AKAP7/ADCY1/SLC8A3/SLC8A2/TACR1/CACNB2/KCNB1/SLC6A4/NRXN1/TNR/NPY5R/PHF24/NEURL1/LRRTM2/KIT/CHRN2/CELF4/SLC4A10/GHRL/GRIK5/FAM107A/SYT4/MAPT/UNC13A/CCR2/LRRK2/CNTN2/SHISA9/SYP/SCGN/MAPK8IP2/ELAVL4/CBLN1/CACNA1B/CACNG5/CNR1/RIMS2/SNAP25/RIMS1/PRKCB/ITPKA/CPLX2/ADIPOQ/CAMK2B/GRM4/SCTR | 54    |
| BP       | GO:0051047 | Positive regulation of secretion                           | 43/917    | 300/18,800 | 2.11E-10 | 2.64E-08 | 2.27E-08 | MYRIP/PLA2G1B/NLGN1/GLPD1/VIP/ABAT/CARTPT/TACR1/CACNB2/KCNB1/SLC6A4/SCAMP5/GALR1/CHRN2/GHRL/ADCYAP1/SYT4/GPR27/CADPS/NKX6-1/SPINK1/PCSK1/SOX11/SYT9/NROB2/AVPR1B/CXCL12/CNR1/CASR/RFX6/FGA/CYP4A11/CFTR/GCK/NR1H4/IGF1/FGB/CDK5R2/SLC30A8/FFAR1/UCN3/BLK/FGG                                                                                | 43    |
| BP       | GO:0035637 | Multicellular organismal signaling                         | 30/917    | 164/18,800 | 3.30E-10 | 4.02E-08 | 3.46E-08 | NRCAM/NTRK2/P2RX1/KCNJ5/KCNA2/FGF12/CARTPT/SLC8A3/SLC8A2/SCN3A/CACNB2/NFASC/SLC8A1/TNR/SCN4A/KCND3/GHRL/ATP2B2/ABCC9/ANK2/SCN3B/SCN7A/CACNG5/ATP1A3/KCNA5/KCNJ3/KCNMB2/HCN4/KCNH6/GLRA1                                                                                                                                                     | 30    |
| BP       | GO:0007204 | Positive regulation of cytosolic calcium ion concentration | 44/917    | 325/18,800 | 8.29E-10 | 9.84E-08 | 8.46E-08 | PLA2G1B/P2RX1/CX3CR1/NOS1/AKAP6/CD36/EPO/SLC8A3/SLC8A2/TACR1/DMD/CACNB2/RIC3/SLC8A1/PTGFR/FASLG/GALR1/CYSLTR1/GHRL/ADCYAP1/ANK2/CCR2/MCOLN3/CCKBR/SPINK1/GPR174/CXCR6/CACNA1B/CCR5/AVPR1B/CNR1/GPR18/LPAR3/PTPRC/TRPV6/GLP1R/XCR1/CCL21/CXCR5/CXCL9/FFAR1/MS4A1/IAPP/CCL19                                                                  | 44    |

(Continued)

**Supplementary Table S1** (Continued)

| Ontology | ID         | Description                                      | GeneRatio | BgRatio    | p-Value  | p.adjust | q-Value  | geneID                                                                                                                                                                                                                                                                                                                                             | Count |
|----------|------------|--------------------------------------------------|-----------|------------|----------|----------|----------|----------------------------------------------------------------------------------------------------------------------------------------------------------------------------------------------------------------------------------------------------------------------------------------------------------------------------------------------------|-------|
| BP       | GO:0034765 | Regulation of ion transmembrane transport        | 56/917    | 476/18,800 | 9.51E-10 | 1.10E-07 | 9.46E-08 | P2RX1/PM20D1/ABCB1/KCNJ5/AMIGO1/NLGN1/KCNA2/KCNAB1/NOS1/AKAP6/KCNJ16/RELN/FGF12/WNK2/RGN/DPP10/CHRM3/EPO/KCNH7/FXYD2/SCN3A/DMD/CACNB2/KCNB1/SLC8A1/PIRT/KCNA3/SCN4A/KCND3/CLTRN/PDZK1/CRHBP/ANK2/KCNV1/CCR2/SHISA9/KCNJ11/CACNA2D2/SCN3B/SCN7A/MAPK8IP2/MIR210/CACNA1B/CACNG5/DPP6/KCNJ3/KCNB2/KCNG3/ABCC8/CFTR/KCNJ6/CLIC3/MRLN/KCNK16/CXCL9/PLP1 | 56    |
| BP       | GO:0001505 | Regulation of neurotransmitter levels            | 34/917    | 213/18,800 | 9.77E-10 | 1.10E-07 | 9.49E-08 | SLC1A2/CHRN3/P2RX1/NLGN1/NOS1/ABAT/ADCY1/CACNB2/SLC5A7/SLC6A4/NRXN1/PAH/PCLO/GRIK5/SYT4/UNC13A/CADPS/LRRK2/SLC29A4/SYP/SYT9/SLC18A2/CHAT/CNR1/RIMS2/SNAP25/RIMS1/PRKCB/CPLX2/GAD2/SYT5/GABRA2/GRM4/SYT8                                                                                                                                            | 34    |
| BP       | GO:0090277 | Positive regulation of peptide hormone secretion | 21/917    | 91/18,800  | 1.94E-09 | 2.13E-07 | 1.84E-07 | MYRIP/GPLD1/ABAT/GHRL/ADCYAP1/GPR27/NKX6-1/SPINK1/NROB2/CASR/RFX6/FGA/CFTR/GCK/NR1H4/FGF/SLC30A8/FFAR1/UCN3/BLK/FGG                                                                                                                                                                                                                                | 21    |
| BP       | GO:0006911 | Phagocytosis, engulfment                         | 25/917    | 128/18,800 | 2.40E-09 | 2.58E-07 | 2.22E-07 | CD36/XKR4/XKR7/IGHV3-64/IGHV6-1/IGHV2-5/IGHV3-74/IGHV4-4/IGHV3-20/IGHV3-7/IGHV3-15/IGHV1-45/IGHV3-72/IGHV3-48/IGHV2-26/IGHV3-49/IGHV4-28/IGHV5-51/IGHV1-69/IGHV4-39/IGHV4-59/IGHA2/IGHV3-21/IGHV3-13/IGHV1-18                                                                                                                                      | 25    |
| BP       | GO:0002253 | Activation of immune response                    | 48/917    | 386/18,800 | 2.53E-09 | 2.62E-07 | 2.25E-07 | C5/GPLD1/CLU/PAK3/FYB2/C6/VAV3/C7/PVRIG/THEMIS/FCN2/C8A/LAX1/CD8A/PRKCB/IGHV3-64/PYHIN1/PTPRC/C4BPA/IGHV6-1/IGHV2-5/IGHV3-74/SH2D1A/TRAT1/IGHV4-4/PLPP4/IGHV3-20/KRT1/IGHV3-7/IGHV3-15/IGHV1-45/IGHV3-72/IGHV3-48/APCS/IGHV2-26/IGHV3-49/IGHV4-28/MS4A1/IGHV5-51/CRP/IGHV1-69/IGHV4-39/IGHV4-59/BLK/IGHA2/IGHV3-21/IGHV3-13/IGHV1-18               | 48    |
| BP       | GO:0006813 | Potassium ion transport                          | 36/917    | 243/18,800 | 2.55E-09 | 2.62E-07 | 2.25E-07 | KCNK3/KCNJ5/AMIGO1/KCNA2/KCNAB1/NOS1/AKAP6/KCNJ16/WNK2/VIP/DPP10/KCNH7/FXYD2/KCNB1/KCNA3/KCND3/ABCC9/ANK2/KCNV1/KCNJ11/HPN/ATP1A3/DPP6/KCNA5/KCNJ3/KCNMB2/HCN4/SNAP25/KCNB2/KCNG3/ATP4A/ABCC8/KCNH6/GCK/KCNJ6/KCNK16                                                                                                                               | 36    |
| BP       | GO:0002793 | Positive regulation of peptide secretion         | 21/917    | 93/18,800  | 2.95E-09 | 2.97E-07 | 2.56E-07 | MYRIP/GPLD1/ABAT/GHRL/ADCYAP1/GPR27/NKX6-1/SPINK1/NROB2/CASR/RFX6/FGA/CFTR/GCK/NR1H4/FGF/SLC30A8/FFAR1/UCN3/BLK/FGG                                                                                                                                                                                                                                | 21    |

**Supplementary Table S1** (Continued)

| Ontology | ID         | Description                              | GeneRatio | BgRatio    | p-Value  | p.adjust | q-Value  | geneID                                                                                                                                                                                                                                                 | Count |
|----------|------------|------------------------------------------|-----------|------------|----------|----------|----------|--------------------------------------------------------------------------------------------------------------------------------------------------------------------------------------------------------------------------------------------------------|-------|
| BP       | GO:0019932 | Second messenger-mediated signaling      | 41/917    | 303/18,800 | 3.18E-09 | 3.13E-07 | 2.69E-07 | BHLHA15/PEX5L/CX3CR1/C10orf71/NOS1/AKAP6/NR5A2/CD36/RGN/ADCY1/CHRM3/SLC8A2/P2RY12/DMD/KSR2/PDE3A/HOMER2/SLC8A1/PTGFR/SELP/PDE3B/ADCYAP1/MAPT/ANK2/CCR2/LRRK2/SPINK1/NEUROD1/CXCR6/SELE/CCR5/AGTR2/PTPRC/GLP1R/XCR1/EPHA5/TRAT1/IGF1/RUNDC3A/CXCR5/SCTR | 41    |
| BP       | GO:0046887 | Positive regulation of hormone secretion | 24/917    | 122/18,800 | 4.30E-09 | 4.15E-07 | 3.57E-07 | MYRIP/GPLD1/ABAT/TACR1/GALR1/GHRL/ADCYAP1/GPR27/NKX6-1/SPINK1/SOX11/NROB2/CASR/RFX6/FGA/CFTR/GCK/NR1H4/FGF/SLC30A8/FFAR1/UCN3/BLK/FGG                                                                                                                  | 24    |
| BP       | GO:0099504 | Synaptic vesicle cycle                   | 30/917    | 183/18,800 | 4.97E-09 | 4.70E-07 | 4.04E-07 | BRSK2/CEL/CHRN3/P2RX1/NLGN1/DNAJC6/SH3GL3/ADCY1/CACNB2/BSN/PACSIN1/PCLO/GRIK5/SYT4/UNC13A/CADPS/LRRK2/SYP/SYT9/SLC18A2/CNR1/RIMS2/SNAP25/RIMS1/PRKCB/SNAP91/SH3GL2/CPLX2/SYT5/SYT8                                                                     | 30    |
| BP       | GO:0099003 | Vesicle-mediated transport in synapse    | 31/917    | 197/18,800 | 7.59E-09 | 6.92E-07 | 5.95E-07 | BRSK2/CEL/CHRN3/P2RX1/NLGN1/DNAJC6/SH3GL3/ADCY1/CACNB2/BSN/PACSIN1/PCLO/GRIK5/SYT4/UNC13A/CADPS/LRRK2/SYP/SYT9/SLC18A2/CNR1/RIMS2/SNAP25/RIMS1/PRKCB/SNAP91/SH3GL2/CPLX2/SYT5/CALY/SYT8                                                                | 31    |
| BP       | GO:0071805 | Potassium ion transmembrane transport    | 33/917    | 219/18,800 | 7.62E-09 | 6.92E-07 | 5.95E-07 | KCNK3/KCNJ5/AMIGO1/KCNA2/KCNAB1/AKAP6/KCNJ16/WNK2/DPP10/KCNH7/FXYD2/KCNB1/KCNA3/KCND3/ABCC9/ANK2/KCNV1/KCNJ11/HPN/ATP1A3/DPP6/KCNA5/KCNJ3/KCNMB2/HCN4/SNAP25/KCNB2/KCNG3/ATP4A/ABCC8/KCNH6/KCNJ6/KCNK16                                                | 33    |
| BP       | GO:0099024 | Plasma membrane invagination             | 25/917    | 137/18,800 | 1.03E-08 | 9.16E-07 | 7.87E-07 | CD36/XKR4/XKR7/IGHV3-64/IGHV6-1/IGHV2-5/IGHV3-74/IGHV4-4/IGHV3-20/IGHV3-7/IGHV3-15/IGHV1-45/IGHV3-72/IGHV3-48/IGHV2-26/IGHV3-49/IGHV4-28/IGHV5-51/IGHV1-69/IGHV4-39/IGHV4-59/IGHA2/IGHV3-21/IGHV3-13/IGHV1-18                                          | 25    |
| BP       | GO:0015844 | Monoamine transport                      | 19/917    | 83/18,800  | 1.31E-08 | 1.14E-06 | 9.83E-07 | P2RX1/SYT6/KCNA2/NOS1/VIP/ABAT/CARTPT/KCNB1/SLC6A4/CHRN2/SYT4/SLC29A4/SYT9/SLC18A2/CXCL12/CNR1/SYT5/CHGA/SYT8                                                                                                                                          | 19    |
| BP       | GO:0007416 | Synapse assembly                         | 29/917    | 180/18,800 | 1.34E-08 | 1.15E-06 | 9.87E-07 | ERBB4/NRCAM/CEL/NTRK2/AMIGO1/NLGN1/GABRB3/ADGRB3/SDK1/FLRT2/BSN/NRXN1/PCDH5/PCLO/LRRTM2/CHRN2/GHRL/SLITRK1/MUSK/DSCAM/CBLN1/IGFN1/GABRG2/GPM6A/CBLN4/CNTN5/GABRA2/LHFPL4/LRRTM3                                                                        | 29    |

(Continued)

Supplementary Table S1 (Continued)

| Ontology | ID         | Description                                   | GeneRatio | BgRatio    | p-Value  | p.adjust | q-Value  | geneID                                                                                                                                                                                                                                                             | Count |
|----------|------------|-----------------------------------------------|-----------|------------|----------|----------|----------|--------------------------------------------------------------------------------------------------------------------------------------------------------------------------------------------------------------------------------------------------------------------|-------|
| BP       | GO:0017157 | Regulation of exocytosis                      | 31/917    | 204/18,800 | 1.77E-08 | 1.49E-06 | 1.28E-06 | CHRN3/P2RX1/SYT6/NLGN1/RAB3C/ADCY1/CACNB2/KCNB1/SCAMP5/PCLO/SYT4/CADPS/CCR2/LRRK2/STXBP5L/SYP/SYT9/CNR1/RIMS2/LGI3/PRKCB/TRPV6/FGA/CPLX2/CFTR/SYT5/FGB/CDK5R2/SYT8/BLK/FGG                                                                                         | 31    |
| BP       | GO:0060078 | Regulation of postsynaptic membrane potential | 24/917    | 131/18,800 | 1.87E-08 | 1.54E-06 | 1.33E-06 | CHRN3/P2RX1/NLGN1/RELN/ABAT/SLC8A3/SLC8A2/NRXN1/CHRN2/CEL4/GHRL/GRIK5/LRRK2/RGS7BP/MAPK8IP2/GLRA3/CBLN1/RIMS2/RIMS1/GABRA4/GABRG2/SEZ6/GLRA1/GABRA2                                                                                                                | 24    |
| BP       | GO:0016064 | Immunoglobulin mediated immune response       | 32/917    | 216/18,800 | 1.95E-08 | 1.58E-06 | 1.36E-06 | C5/CLU/C6/C7/C8A/IGHV3-64/PTPRC/C4BPA/TLR8/IGHV6-1/IGHV2-5/IGHV3-74/IGHV4-4/IGHV3-20/IGHV3-7/IGHV3-15/IGHV1-45/IGHV3-72/IGHV3-48/APCS/IGHV2-26/IGHV3-49/IGHV4-28/IGHV5-51/CRP/IGHV1-69/IGHV4-39/IGHV4-59/IGHA2/IGHV3-21/IGHV3-13/IGHV1-18                          | 32    |
| BP       | GO:0019724 | B cell-mediated immunity                      | 32/917    | 219/18,800 | 2.73E-08 | 2.18E-06 | 1.87E-06 | C5/CLU/C6/C7/C8A/IGHV3-64/PTPRC/C4BPA/TLR8/IGHV6-1/IGHV2-5/IGHV3-74/IGHV4-4/IGHV3-20/IGHV3-7/IGHV3-15/IGHV1-45/IGHV3-72/IGHV3-48/APCS/IGHV2-26/IGHV3-49/IGHV4-28/IGHV5-51/CRP/IGHV1-69/IGHV4-39/IGHV4-59/IGHA2/IGHV3-21/IGHV3-13/IGHV1-18                          | 32    |
| BP       | GO:0010324 | Membrane invagination                         | 25/917    | 144/18,800 | 2.91E-08 | 2.28E-06 | 1.96E-06 | CD36/XKR4/XKR7/IGHV3-64/IGHV6-1/IGHV2-5/IGHV3-74/IGHV4-4/IGHV3-20/IGHV3-7/IGHV3-15/IGHV1-45/IGHV3-72/IGHV3-48/IGHV2-26/IGHV3-49/IGHV4-28/IGHV5-51/IGHV1-69/IGHV4-39/IGHV4-59/IGHA2/IGHV3-21/IGHV3-13/IGHV1-18                                                      | 25    |
| BP       | GO:0050851 | Antigen receptor-mediated signaling pathway   | 34/917    | 244/18,800 | 3.37E-08 | 2.60E-06 | 2.24E-06 | FYB2/VAV3/PVRIG/THEMIS/LAX1/CD8A/PRKCB/IGHV3-64/PTPRC/IGHV6-1/IGHV2-5/IGHV3-74/SH2D1A/TRAT1/IGHV4-4/IGHV3-20/IGHV3-7/IGHV3-15/IGHV1-45/IGHV3-72/IGHV3-48/IGHV2-26/IGHV3-49/IGHV4-28/MS4A1/IGHV5-51/IGHV1-69/IGHV4-39/IGHV4-59/BLK/IGHA2/IGHV3-21/IGHV3-13/IGHV1-18 | 34    |
| BP       | GO:0016079 | Synaptic vesicle exocytosis                   | 21/917    | 107/18,800 | 4.14E-08 | 3.14E-06 | 2.70E-06 | CHRN3/P2RX1/NLGN1/ADCY1/CACNB2/PCLO/GRIK5/SYT4/UNC13A/CADPS/LRRK2/SYP/SYT9/CNR1/RIMS2/SNAP25/RIMS1/PRKCB/CPLX2/SYT5/SYT8                                                                                                                                           | 21    |
| BP       | GO:0007586 | Digestion                                     | 24/917    | 137/18,800 | 4.59E-08 | 3.43E-06 | 2.95E-06 | AMY2A/CYP39A1/CEL/PNLIP/CLPS/PNLIPR2/PRSS1/CD36/CTRB2/CTRB1/CHRM3/TACR1/PRSS2/GHRL/CCKBR/SPINK1/NEUROD1/FGF10/PRSS3/ARX/CLPSL1/UCN3/SST/MUC6                                                                                                                       | 24    |

**Supplementary Table S1** (Continued)

| Ontology | ID         | Description                                                        | GeneRatio | BgRatio    | p-Value  | p.adjust | q-Value  | geneID                                                                                                                                                                                                                                                                                             | Count |
|----------|------------|--------------------------------------------------------------------|-----------|------------|----------|----------|----------|----------------------------------------------------------------------------------------------------------------------------------------------------------------------------------------------------------------------------------------------------------------------------------------------------|-------|
| BP       | GO:1903522 | Regulation of blood circulation                                    | 35/917    | 260/18,800 | 5.14E-08 | 3.73E-06 | 3.20E-06 | SPX/MYH7/P2RX1/KCNJ5/NOS1/MYH6/CHRM3/SLC8A3/SLC8A2/TACR1/DMD/CACNB2/SLC8A1/KCND3/CYSLTR1/GHRL/ATP2B2/ABCC9/ANK2/SCN3B/ATP1A3/AVPR1B/KCNA5/KCNJ3/CHRM2/KCNMB2/HCN4/AGTR2/CASR/KCNH6/GLP1R/FGA/FGF/CHGA/FGG                                                                                          | 35    |
| BP       | GO:0098659 | Inorganic cation import across plasma membrane                     | 22/917    | 118/18,800 | 5.23E-08 | 3.73E-06 | 3.20E-06 | SCNN1B/P2RX1/KCNJ5/KCNJ16/WNK2/SLC8A3/SLC8A2/FXYD2/SLC8A1/SCNN1G/ABCC9/KCNJ11/CNGA3/MIR210/CACNA1B/ATP1A3/KCNJ3/HCN4/ATP4A/TRPV6/SLC39A5/KCNJ6                                                                                                                                                     | 22    |
| BP       | GO:0099587 | Inorganic ion import across plasma membrane                        | 22/917    | 118/18,800 | 5.23E-08 | 3.73E-06 | 3.20E-06 | SCNN1B/P2RX1/KCNJ5/KCNJ16/WNK2/SLC8A3/SLC8A2/FXYD2/SLC8A1/SCNN1G/ABCC9/KCNJ11/CNGA3/MIR210/CACNA1B/ATP1A3/KCNJ3/HCN4/ATP4A/TRPV6/SLC39A5/KCNJ6                                                                                                                                                     | 22    |
| BP       | GO:0098657 | Import into cell                                                   | 33/917    | 238/18,800 | 6.04E-08 | 4.24E-06 | 3.64E-06 | SPX/SLC1A2/SCNN1B/P2RX1/KCNJ5/SLC7A2/NOS1/KCNJ16/WNK2/CD36/SLC8A3/SLC8A2/FXYD2/SLC6A4/SLC8A1/CLTRN/SCNN1G/ABCC9/SLC29A4/KCNJ11/CNGA3/SLC18A2/ITGA4/MIR210/CACNA1B/ATP1A3/KCNJ3/HCN4/SNAP25/ATP4A/TRPV6/SLC39A5/KCNJ6                                                                               | 33    |
| BP       | GO:0099565 | Chemical synaptic transmission, postsynaptic                       | 20/917    | 101/18,800 | 7.41E-08 | 5.12E-06 | 4.40E-06 | CHRN3/P2RX1/NLGN1/RELN/ABAT/SLC8A3/SLC8A2/NRXN1/CHRN2/CELF4/GHRL/GRIK5/LRRK2/MAPK8IP2/GLRA3/CBLN1/RIMS2/RIMS1/SEZ6/GLRA1                                                                                                                                                                           | 20    |
| BP       | GO:0050871 | Positive regulation of B cell activation                           | 25/917    | 152/18,800 | 8.78E-08 | 5.97E-06 | 5.13E-06 | VAV3/CHRN2/IGHV3-64/PTPRC/IGHV6-1/IGHV2-5/IGHV3-74/IGHV4-4/IGHV3-20/IGHV3-7/IGHV3-15/IGHV1-45/IGHV3-72/IGHV3-48/IGHV2-26/IGHV3-49/IGHV4-28/IGHV5-51/IGHV1-69/IGHV4-39/IGHV4-59/IGHA2/IGHV3-21/IGHV3-13/IGHV1-18                                                                                    | 25    |
| BP       | GO:0002768 | Immune response-regulating cell surface receptor signaling pathway | 40/917    | 328/18,800 | 9.25E-08 | 6.21E-06 | 5.34E-06 | GPLD1/PAK3/FYB2/VAV3/PVRIG/THEMIS/KIT/LAX1/CD8A/PRKCB/IGHV3-64/PTPRC/MS4A2/IGHV6-1/IGHV2-5/IGHV3-74/BTLA/SH2D1A/TRAT1/IGHV4-4/PLPP4/IGHV3-20/IGHV3-7/IGHV3-15/IGHV1-45/IGHV3-72/IGHV3-48/IGHV2-26/IGHV3-49/IGHV4-28/MS4A1/IGHV5-51/IGHV1-69/IGHV4-39/IGHV4-59/BLK/IGHA2/IGHV3-21/IGHV3-13/IGHV1-18 | 40    |
| BP       | GO:0032024 | Positive regulation of insulin secretion                           | 16/917    | 67/18,800  | 9.72E-08 | 6.43E-06 | 5.53E-06 | MYRIP/GPLD1/ABAT/GHRL/GPR27/NKX6-1/NR0B2/CASR/RFX6/CFTR/GCK/NR1H4/SLC30A8/FFAR1/UCN3/BLK                                                                                                                                                                                                           | 16    |

(Continued)



**Supplementary Table S1** (Continued)

| Ontology | ID         | Description                                                               | GeneRatio | BgRatio    | p-Value  | p.adjust | q-Value  | geneID                                                                                                                                                                                                                                                                              | Count |
|----------|------------|---------------------------------------------------------------------------|-----------|------------|----------|----------|----------|-------------------------------------------------------------------------------------------------------------------------------------------------------------------------------------------------------------------------------------------------------------------------------------|-------|
| BP       | GO:0007188 | Adenylate cyclase-modulating G protein-coupled receptor signaling pathway | 33/917    | 244/18,800 | 1.10E-07 | 7.19E-06 | 6.18E-06 | GPHA2/VIPR2/MTNR1A/VIP/ADCY1/CHRM3/ADGRB3/GPR37/P2RY12/PTGFR/GALR1/TSHR/GNAZ/ADCYAP1/GNAO1/ADGRG2/APLP1/SSTR2/AVPR1B/CHRM2/CNR1/RIMS2/NPY1R/GPR119/LPAR3/CASR/GLP1R/CHGA/CXCL9/UCN3/GRM4/SCTR/IAPP                                                                                  | 33    |
| BP       | GO:0006887 | Exocytosis                                                                | 42/917    | 357/18,800 | 1.22E-07 | 7.84E-06 | 6.74E-06 | BRSK2/CHRN3/P2RX1/SYT6/SYCN/NLGN1/RAB3C/ADCY1/CACNB2/KCNB1/SCAMP5/PCLO/KIT/CLTRN/GRIK5/SYT4/CRHBP/UNC13A/CADPS/CCR2/LRRK2/STXBP5L/SYP/SYT9/CNR1/RIMS2/SNAP25/LGI3/RIMS1/PRKCB/TRPV6/FGA/CPLX2/CFTR/SYT5/FGF/CHGA/TRARG1/CDK5R2/SYT8/BLK/FGG                                         | 42    |
| BP       | GO:0045055 | Regulated exocytosis                                                      | 32/917    | 234/18,800 | 1.32E-07 | 8.29E-06 | 7.13E-06 | CHRN3/P2RX1/SYT6/NLGN1/ADCY1/CACNB2/KCNB1/SCAMP5/PCLO/KIT/CLTRN/GRIK5/SYT4/CRHBP/UNC13A/CADPS/CCR2/LRRK2/SYP/SYT9/CNR1/RIMS2/SNAP25/RIMS1/PRKCB/TRPV6/CPLX2/SYT5/CHGA/CDK5R2/SYT8/BLK                                                                                               | 32    |
| BP       | GO:0060079 | Excitatory postsynaptic potential                                         | 19/917    | 95/18,800  | 1.33E-07 | 8.29E-06 | 7.13E-06 | CHRN3/P2RX1/NLGN1/RELN/SLC8A3/SLC8A2/NRXN1/CHRN2/CELFA4/GHRL/GRIK5/LRRK2/MAPK8IP2/GLRA3/CBLN1/RIMS2/RIMS1/SEZ6/GLRA1                                                                                                                                                                | 19    |
| BP       | GO:0043270 | Positive regulation of ion transport                                      | 35/917    | 273/18,800 | 1.74E-07 | 1.07E-05 | 9.23E-06 | PLA2G1B/P2RX1/ABCB1/AMIGO1/NOS1/AKAP6/RELN/FGF12/WNK2/RGN/ABAT/FXYD2/P2RY12/DMD/CACNB2/SLC6A4/SLC38A3/PIRT/CLTRN/CHRN2/PDZK1/SYT4/ANK2/CCR2/SCN3B/MIR210/AVPR1B/CXCL12/CASR/ABCC8/CYP4A11/CFTR/CXCL9/PLP1/FFAR1                                                                     | 35    |
| BP       | GO:0006814 | Sodium ion transport                                                      | 33/917    | 249/18,800 | 1.79E-07 | 1.09E-05 | 9.36E-06 | SCNN1B/NOS1/FGF12/WNK2/SLC6A16/SLC5A9/SLC8A3/SLC8A2/FXYD2/SCN3A/DMD/SLC5A7/SLC6A4/SLC8A1/SLC5A4/SLC38A3/SCN4A/SLC4A4/SLC4A10/SCNN1G/SLC17A4/SLC6A15/SLC17A1/SCN3B/SCN7A/SLC38A11/SLC38A4/ATP1A3/SLC5A8/HCN4/SLC10A2/ATP4A/SLC6A17                                                   | 33    |
| BP       | GO:0002429 | Immune response-activating cell surface receptor signaling pathway        | 37/917    | 300/18,800 | 2.10E-07 | 1.25E-05 | 1.07E-05 | GPLD1/PAK3/FYB2/VAV3/PVRIG/THEMIS/LAX1/CD8A/PRKCB/IGHV3-64/PTPRC/IGHV6-1/IGHV2-5/IGHV3-74/SH2D1A/TRAT1/IGHV4-4/PLPP4/IGHV3-20/IGHV3-7/IGHV3-15/IGHV1-45/IGHV3-72/IGHV3-48/IGHV2-26/IGHV3-49/IGHV4-28/MS4A1/IGHV5-51/IGHV1-69/IGHV4-39/IGHV4-59/BLK/IGHA2/IGHV3-21/IGHV3-13/IGHV1-18 | 37    |

**Supplementary Table S1** (Continued)

| Ontology | ID         | Description                                               | GeneRatio | BgRatio    | p-Value  | p.adjust | q-Value  | geneID                                                                                                                                                                                                                                                                              | Count |
|----------|------------|-----------------------------------------------------------|-----------|------------|----------|----------|----------|-------------------------------------------------------------------------------------------------------------------------------------------------------------------------------------------------------------------------------------------------------------------------------------|-------|
| BP       | GO:0002757 | Immune response-activating signal transduction            | 37/917    | 300/18,800 | 2.10E-07 | 1.25E-05 | 1.07E-05 | GPLD1/PAK3/FYB2/VAV3/PVRIG/THEMIS/LAX1/CD8A/PRKCB/IGHV3-64/PTPRC/IGHV6-1/IGHV2-5/IGHV3-74/SH2D1A/TRAT1/IGHV4-4/PLPP4/IGHV3-20/IGHV3-7/IGHV3-15/IGHV1-45/IGHV3-72/IGHV3-48/IGHV2-26/IGHV3-49/IGHV4-28/MS4A1/IGHV5-51/IGHV1-69/IGHV4-39/IGHV4-59/BLK/IGHA2/IGHV3-21/IGHV3-13/IGHV1-18 | 37    |
| BP       | GO:0003018 | Vascular process in circulatory system                    | 34/917    | 263/18,800 | 2.13E-07 | 1.25E-05 | 1.07E-05 | SLC1A2/SCNN1B/P2RX1/ABCB1/SLC16A12/SLC7A2/NOS1/CD36/UTS2R/CHRM3/SLC8A2/TACR1/PDE3A/SLC6A4/SLC8A1/SLC38A3/SLCO1C1/C2CD4B/CYSLTR1/SLC4A4/ABCC9/SLC29A4/AVPR1B/KCNA5/KCNMB2/AGTR2/SH3GL2/CASR/ABCC8/FGA/FGB/SLC6A17/CRP/FGG                                                            | 34    |
| BP       | GO:0050714 | Positive regulation of protein secretion                  | 22/917    | 128/18,800 | 2.34E-07 | 1.36E-05 | 1.17E-05 | MYRIP/PLA2G1B/GPLD1/ABAT/GHRL/GPR27/NKX6-1/PCSK1/NR0B2/CASR/RFX6/FGA/CFTR/GCK/NR1H4/IGF1/FGB/SLC30A8/FFAR1/UCN3/BLK/FGG                                                                                                                                                             | 22    |
| BP       | GO:0051937 | Catecholamine transport                                   | 16/917    | 72/18,800  | 2.83E-07 | 1.62E-05 | 1.39E-05 | SYT6/KCNA2/VIP/ABAT/CARTPT/KCNB1/CHRN2/SYT4/SLC29A4/SYT9/SLC18A2/CXCL12/CNR1/SYT5/CHGA/SYT8                                                                                                                                                                                         | 16    |
| BP       | GO:0098742 | Cell-cell adhesion via plasma membrane adhesion molecules | 35/917    | 279/18,800 | 2.96E-07 | 1.67E-05 | 1.44E-05 | UMOD/MMP24/AMIGO1/PCDHA3/NLGN1/PCDHA10/PCDHA4/REG3A/DSCAML1/SDK1/PCDHB1/PCDHB5/SELP/RET/PTPRT/PCDHA6/SLITRK1/CDH22/PCDH9/PCDHA1/CNTN2/DSCAM/CBLN1/PCDHA11/SELE/IGFN1/PCDHA12/PCDHAC1/PCDHGB5/CADM3/CDH10/ADIPOQ/NECTIN4/CDH19/UNC5D                                                 | 35    |
| BP       | GO:0015837 | Amine transport                                           | 19/917    | 100/18,800 | 3.09E-07 | 1.72E-05 | 1.48E-05 | SYT6/KCNA2/VIP/ABAT/CARTPT/KCNB1/SLC38A3/NPY5R/CLTRN/CHRN2/SYT4/SYT9/SLC18A2/AVPR1B/CXCL12/CNR1/SYT5/CHGA/SYT8                                                                                                                                                                      | 19    |
| BP       | GO:0050433 | Regulation of catecholamine secretion                     | 14/917    | 56/18,800  | 3.34E-07 | 1.84E-05 | 1.58E-05 | SYT6/KCNA2/VIP/ABAT/CARTPT/KCNB1/CHRN2/SYT4/SYT9/CXCL12/CNR1/SYT5/CHGA/SYT8                                                                                                                                                                                                         | 14    |
| BP       | GO:0051952 | Regulation of amine transport                             | 18/917    | 92/18,800  | 3.99E-07 | 2.17E-05 | 1.87E-05 | SYT6/KCNA2/VIP/ABAT/CARTPT/KCNB1/SLC38A3/NPY5R/CLTRN/CHRN2/SYT4/SYT9/AVPR1B/CXCL12/CNR1/SYT5/CHGA/SYT8                                                                                                                                                                              | 18    |
| BP       | GO:0050432 | Catecholamine secretion                                   | 14/917    | 57/18,800  | 4.23E-07 | 2.27E-05 | 1.96E-05 | SYT6/KCNA2/VIP/ABAT/CARTPT/KCNB1/CHRN2/SYT4/SYT9/CXCL12/CNR1/SYT5/CHGA/SYT8                                                                                                                                                                                                         | 14    |

(Continued)

Supplementary Table S1 (Continued)

| Ontology | ID         | Description                                                     | GeneRatio | BgRatio    | p-Value  | p.adjust | q-Value  | geneID                                                                                                                                                                                                                                                            | Count |
|----------|------------|-----------------------------------------------------------------|-----------|------------|----------|----------|----------|-------------------------------------------------------------------------------------------------------------------------------------------------------------------------------------------------------------------------------------------------------------------|-------|
| BP       | GO:0015850 | Organic hydroxy compound transport                              | 32/917    | 248/18,800 | 5.04E-07 | 2.68E-05 | 2.30E-05 | CEL/PNLIP/P2RX1/SYT6/KCNA2/CLU/NOS1/CD36/VIP/ABAT/CARTPT/KCNB1/SLC6A4/SLCO1C1/GALR1/CHRN2/GHRL/SYT4/SLC29A4/SYT9/ABCA8/SLC18A2/NROB2/SLC5A8/CXCL12/CNR1/SLC10A2/CFTR/SYT5/CHGA/MTTP/SYT8                                                                          | 32    |
| BP       | GO:0009749 | Response to glucose                                             | 27/917    | 189/18,800 | 5.20E-07 | 2.74E-05 | 2.35E-05 | BRSK2/GPLD1/CMA1/KCNB1/SLC8A1/AQP4/CLTRN/GHRL/GRIK5/GPR27/NKX6-1/PCSK1/NEUROD1/NROB2/CASR/RFX6/ZBED6/EPHA5/CFTR/GCK/NKX2-2/NR1H4/ADIPOQ/PTPRN/SLC30A8/PCK1/UCN3                                                                                                   | 27    |
| BP       | GO:0007269 | Neurotransmitter secretion                                      | 23/917    | 145/18,800 | 5.56E-07 | 2.86E-05 | 2.46E-05 | CHRN3/P2RX1/NLGN1/ADCY1/CACNB2/NRXN1/PCLO/GRIK5/SYT4/UNC13A/CADPS/LRRK2/SYP/SYT9/CNR1/RIMS2/SNAP25/RIMS1/PRKCB/CPLX2/SYT5/GRM4/SYT8                                                                                                                               | 23    |
| BP       | GO:0099643 | Signal release from synapse                                     | 23/917    | 145/18,800 | 5.56E-07 | 2.86E-05 | 2.46E-05 | CHRN3/P2RX1/NLGN1/ADCY1/CACNB2/NRXN1/PCLO/GRIK5/SYT4/UNC13A/CADPS/LRRK2/SYP/SYT9/CNR1/RIMS2/SNAP25/RIMS1/PRKCB/CPLX2/SYT5/GRM4/SYT8                                                                                                                               | 23    |
| BP       | GO:0007156 | Homophilic cell adhesion via plasma membrane adhesion molecules | 25/917    | 168/18,800 | 6.28E-07 | 3.19E-05 | 2.75E-05 | AMIGO1/PCDHA3/PCDHA10/PCDHA4/DSCAML1/SDK1/PCDHB1/PCDHB5/RET/PTPR1/PCDHA6/CDH22/PCDH9/PCDHA1/CNTN2/DSCAM/PCDHA11/IGFN1/PCDHA12/PCDHAC1/PCDHGB5/CADM3/CDH10/NECTIN4/CDH19                                                                                           | 25    |
| BP       | GO:0009746 | Response to hexose                                              | 27/917    | 193/18,800 | 7.93E-07 | 3.99E-05 | 3.43E-05 | BRSK2/GPLD1/CMA1/KCNB1/SLC8A1/AQP4/CLTRN/GHRL/GRIK5/GPR27/NKX6-1/PCSK1/NEUROD1/NROB2/CASR/RFX6/ZBED6/EPHA5/CFTR/GCK/NKX2-2/NR1H4/ADIPOQ/PTPRN/SLC30A8/PCK1/UCN3                                                                                                   | 27    |
| BP       | GO:0002377 | Immunoglobulin production                                       | 29/917    | 218/18,800 | 9.09E-07 | 4.52E-05 | 3.89E-05 | IGKV2-28/IGKV2D-28/PTPRC/IGLV5-37/IGLV7-46/IGLV7-43/IGKV1D-39/IGKV1-12/IGKV1-39/IGKV5-2/IGLV2-8/IGKV1D-13/IGLV2-18/IGKV1-17/IGKV2-24/IGKV1-6/IGLV4-60/IGLV6-57/IGKV1-16/IGLV4-69/IGLV10-54/IGLV3-27/IGLV5-45/IGKV4-1/IGLV3-19/IGKV3D-20/IGKV1-27/IGKV1-9/IGLV8-61 | 29    |
| BP       | GO:0007218 | Neuropeptide signaling pathway                                  | 19/917    | 108/18,800 | 1.07E-06 | 5.25E-05 | 4.51E-05 | GRPR/SORCS1/UTS2R/CARTPT/GPR37/NPY5R/GALR1/CYSLTR1/ADCYAP1/PRLHR/GLRA3/SSTR2/CPE/NPY1R/SSTR3/SCG5/NPY/GLRA1/PPY                                                                                                                                                   | 19    |
| BP       | GO:0048167 | Regulation of synaptic plasticity                               | 27/917    | 198/18,800 | 1.32E-06 | 6.43E-05 | 5.53E-05 | NTRK2/CX3CR1/RELN/ADCY1/SLC8A3/SLC8A2/KCNB1/TNR/NEURL1/LRRTM2/KIT/SLC4A10/FAM107A/SYT4/MAPT/CNTN2/SHISA9/SYP/SCGN/CBLN1/RIMS2/SNAP25/RIMS1/ITPKA/CPLX2/CAMK2B/SCTR                                                                                                | 27    |

**Supplementary Table S1** (Continued)

| Ontology | ID         | Description                                 | GeneRatio | BgRatio    | p-Value  | p.adjust | q-Value  | geneID                                                                                                                                                                                                                                                                   | Count |
|----------|------------|---------------------------------------------|-----------|------------|----------|----------|----------|--------------------------------------------------------------------------------------------------------------------------------------------------------------------------------------------------------------------------------------------------------------------------|-------|
| BP       | GO:0098739 | Import across plasma membrane               | 26/917    | 188/18,800 | 1.58E-06 | 7.59E-05 | 6.53E-05 | SLC1A2/SCNN1B/P2RX1/KCNJ5/SLC7A2/KCNJ16/WNK2/CD36/SLC8A3/SLC8A2/FXYD2/SLC8A1/CLTRN/SCNN1G/ABCC9/KCNJ11/CNGA3/MIR210/CACNA1B/ATP1A3/KCNJ3/HCN4/ATP4A/TRPV6/SLC39A5/KCNJ6                                                                                                  | 26    |
| BP       | GO:0034284 | Response to monosaccharide                  | 27/917    | 200/18,800 | 1.61E-06 | 7.59E-05 | 6.53E-05 | BRSK2/GPLD1/CMA1/KCNB1/SLC8A1/AQP4/CLTRN/GHRL/GRIK5/GPR27/NKX6-1/PCSK1/NEUROD1/NR0B2/CASR/RFX6/ZBED6/EPHA5/CFTR/GCK/NKX2-2/NR1H4/ADIPOQ/PTPRN/SLC30A8/PCK1/UCN3                                                                                                          | 27    |
| BP       | GO:0050864 | Regulation of B cell activation             | 27/917    | 200/18,800 | 1.61E-06 | 7.59E-05 | 6.53E-05 | VAV3/CHRN2/SFRP1/IGHV3-64/PTPRC/IGHV6-1/IGHV2-5/IGHV3-74/IGHV4-4/IGHV3-20/IGHV3-7/IGHV3-15/IGHV1-45/IGHV3-72/IGHV3-48/IGHV2-26/IGHV3-49/IGHV4-28/IGHV5-51/IGHV1-69/IGHV4-39/IGHV4-59/BLK/IGHA2/IGHV3-21/IGHV3-13/IGHV1-18                                                | 27    |
| BP       | GO:0035725 | Sodium ion transmembrane transport          | 25/917    | 177/18,800 | 1.68E-06 | 7.85E-05 | 6.75E-05 | SCNN1B/NOS1/FGF12/WNK2/SLC6A16/SLC8A3/SLC8A2/FXYD2/SCN3A/DMD/SLC6A4/SLC8A1/SCN4A/SLC4A4/SLC4A10/SCNN1G/SLC17A4/SLC6A15/SLC17A1/SCN3B/SCN7A/ATP1A3/HCN4/ATP4A/SLC6A17                                                                                                     | 25    |
| BP       | GO:0003012 | Muscle system process                       | 46/917    | 449/18,800 | 1.70E-06 | 7.85E-05 | 6.75E-05 | SPX/MYH7/SCNN1B/SORBS2/P2RX1/KCNJ5/DTNA/MYLK2/NOS1/AKAP6/GATM/FGF12/MYH6/KLF15/ABAT/GAMT/CHRM3/SLC8A3/TACR1/DMD/CACNB2/SLC8A1/TMOD1/SCN4A/KCND3/KIT/CHRN2/GHRL/GNAO1/ANK2/SCN3B/SCN7A/KLHL41/SSTR2/MYBPC2/KCNA5/KCNJ3/CHRM2/HCN4/KCNB2/MYOC/ABCC8/IGF1/CAMK2B/CHGA/GLRA1 | 46    |
| BP       | GO:0019226 | Transmission of nerve impulse               | 15/917    | 73/18,800  | 1.92E-06 | 8.75E-05 | 7.52E-05 | NRCAM/NTRK2/P2RX1/KCNA2/FGF12/CARTPT/SCN3A/NFASC/TNR/SCN4A/GHRL/SCN7A/CACNG5/KCNMB2/GLRA1                                                                                                                                                                                | 15    |
| BP       | GO:1903035 | Negative regulation of response to wounding | 17/917    | 92/18,800  | 1.93E-06 | 8.75E-05 | 7.52E-05 | F11/RTN4RL1/ABAT/KIAA0319/MMRN1/KLKB1/TNR/VTN/AJAP1/APOH/ABCC8/FGA/FGB/KRT1/APCS/KLK8/FGG                                                                                                                                                                                | 17    |
| BP       | GO:0019722 | Calcium-mediated signaling                  | 27/917    | 202/18,800 | 1.95E-06 | 8.78E-05 | 7.55E-05 | BHLHA15/CX3CR1/C10orf71/AKAP6/NR5A2/RGN/CHRM3/SLC8A2/P2RY12/DMD/KSR2/HOMER2/SLC8A1/PTGFR/SELP/MAPT/ANK2/CCR2/LRRK2/CXCR6/SELE/CCR5/PTPRC/XCR1/TRAT1/IGF1/CXCR5                                                                                                           | 27    |

(Continued)

Supplementary Table S1 (Continued)

| Ontology | ID         | Description                          | GeneRatio | BgRatio    | p-Value  | p.adjust | q-Value  | geneID                                                                                                                                                                                                                                                                       | Count |
|----------|------------|--------------------------------------|-----------|------------|----------|----------|----------|------------------------------------------------------------------------------------------------------------------------------------------------------------------------------------------------------------------------------------------------------------------------------|-------|
| BP       | GO:0006816 | Calcium ion transport                | 44/917    | 424/18,800 | 2.03E-06 | 9.02E-05 | 7.76E-05 | BHLHA15/PLA2G1B/P2RX1/NOS1/AKAP6/TRPM6/RGN/EPO/SLC8A3/SLC8A2/DMD/CACNB2/HOMER2/SLC8A1/FASLG/CYSLTR1/CHRN2/EGF/ATP2B2/ANK2/MCOLN3/CACNA2D2/SPINK1/TRPM3/CACNA1B/CACNG5/CCR5/CXCL12/PRKCB/CASR/PTPRC/GPM6A/TRPV6/XCR1/GCK/CAMK2B/PLPP4/CCL21/MRLN/CXCL9/PLP1/FFAR1/MS4A1/CCL19 | 44    |
| BP       | GO:0017156 | Calcium ion-regulated exocytosis     | 14/917    | 65/18,800  | 2.33E-06 | 0.000103 | 8.82E-05 | SYT6/KCNB1/SCAMP5/CLTRN/SYT4/UNC13A/CADPS/SYT9/RIMS2/RIMS1/TRPV6/SYT5/CDK5R2/SYT8                                                                                                                                                                                            | 14    |
| BP       | GO:0008217 | Regulation of blood pressure         | 25/917    | 183/18,800 | 3.12E-06 | 0.000136 | 0.000117 | SPX/P2RX1/ACSM3/NOS1/KL/CMA1/MYH6/UTS2R/ABAT/CARTPT/TACR1/KLK1/CTSG/ANPEP/TRHDE/AVPR1B/CNR1/NPY1R/AGTR2/GLP1R/CYP4A11/ADIPOQ/NPY/CHGA/KLK2                                                                                                                                   | 25    |
| BP       | GO:0006936 | Muscle contraction                   | 38/917    | 349/18,800 | 3.24E-06 | 0.00014  | 0.000121 | SPX/MYH7/SCNN1B/P2RX1/KCNJ5/DTNA/MYLK2/NOS1/FGF12/MYH6/ABAT/GAMT/CHRM3/SLC8A3/TACR1/DMD/CACNB2/SLC8A1/TMOD1/SCN4A/KCND3/KIT/CHRN2/GHRL/GNAO1/ANK2/SCN3B/SCN7A/KLHL41/SSTR2/MYBPC2/KCNA5/KCNJ3/CHRM2/HCN4/KCNB2/CHGA/GLRA1                                                    | 38    |
| BP       | GO:0021700 | Developmental maturation             | 34/917    | 296/18,800 | 3.29E-06 | 0.000141 | 0.000121 | BHLHA15/NRCAM/SYBU/CX3CR1/RELN/ZBTB16/EPO/ADGRB3/PDE3A/NRXN1/RET/NEURL1/BCL11A/UNC13A/LRRK2/NKX6-1/CNTN2/SPINK1/SYP/MYOC/SEZ6/ASCL1/CFTR/IGF1/ACTL6B/TDRD1/CAMK2B/PTPRN/CCL21/CDK5R2/FEV/PAEP/FGG/CCL19                                                                      | 34    |
| BP       | GO:0031644 | Regulation of nervous system process | 21/917    | 138/18,800 | 3.39E-06 | 0.000144 | 0.000124 | SPX/NLGN1/RELN/FGF12/VIP/ABAT/CARTPT/SLC8A3/SLC8A2/NRXN1/TNR/CELFA4/GHRL/LRRK2/SHISA9/CBLN1/CACNG5/RIMS2/RIMS1/GLRA1/KLK8                                                                                                                                                    | 21    |
| BP       | GO:0006909 | Phagocytosis                         | 35/917    | 310/18,800 | 3.50E-06 | 0.000147 | 0.000127 | CD36/RAB39A/VAV3/XKR4/FCN2/CCR2/XKR7/IGHV3-64/PTPRC/SPACA3/C4BPA/IGHV6-1/IGHV2-5/IGHV3-74/ADIPOQ/IGHV4-4/PLPP4/IGHV3-20/IGHV3-7/IGHV3-15/IGHV1-45/IGHV3-72/IGHV3-48/IGHV2-26/IGHV3-49/IGHV4-28/IGHV5-51/CRP/IGHV1-69/IGHV4-39/IGHV4-59/IGHA2/IGHV3-21/IGHV3-13/IGHV1-18      | 35    |
| BP       | GO:0050807 | Regulation of synapse organization   | 27/917    | 209/18,800 | 3.77E-06 | 0.000157 | 0.000135 | NRCAM/CTTNBP2/NTRK2/AMIGO1/NLGN1/PAK3/RELN/KIF1A/ADGRB3/FLRT2/NRXN1/NEURL1/LRRTM2/CHRN2/GHRL/SLITRK1/MUSK/LRRK2/C1QL3/CBLN1/CTNNA2/ITPKA/GPM6A/CAMK2B/LHFPL4/KLK8/LRRTM3                                                                                                     | 27    |

**Supplementary Table S1** (Continued)

| Ontology | ID         | Description                                  | GeneRatio | BgRatio    | p-Value  | p.adjust | q-Value  | geneID                                                                                                                                                                                                                                                                                                                                      | Count |
|----------|------------|----------------------------------------------|-----------|------------|----------|----------|----------|---------------------------------------------------------------------------------------------------------------------------------------------------------------------------------------------------------------------------------------------------------------------------------------------------------------------------------------------|-------|
| BP       | GO:0015872 | Dopamine transport                           | 12/917    | 51/18,800  | 4.60E-06 | 0.00019  | 0.000163 | SYT6/KCNA2/ABAT/CHRN2/SYT4/SLC29A4/SYT9/SLC18A2/CXCL12/CNR1/SYT5/SYT8                                                                                                                                                                                                                                                                       | 12    |
| BP       | GO:1903236 | Regulation of leukocyte tethering or rolling | 7/917     | 16/18,800  | 4.99E-06 | 0.000204 | 0.000176 | SELP/CCR2/ITGA4/SELE/CXCL12/CCL21/FUT9                                                                                                                                                                                                                                                                                                      | 7     |
| BP       | GO:0002764 | Immune response-regulating signaling pathway | 47/917    | 482/18,800 | 5.08E-06 | 0.000206 | 0.000177 | GPLD1/REG3G/PAK3/CD36/FYB2/VAV3/PVRIG/THEMIS/KIT/TLR7/LAX1/CD8A/PRKCB/IGHV3-64/PTPRC/MS4A2/TLR8/IGHV6-1/IGHV2-5/IGHV3-74/BTLA/TLR10/SH2D1A/TRAT1/NR1H4/IGHV4-4/PLPP4/IGHV3-20/IGHV3-7/IGHV3-15/IGHV1-45/IGHV3-72/S100A14/IGHV3-48/IGHV2-26/IGHV3-49/IGHV4-28/MS4A1/IGHV5-51/IGHV1-69/IGHV4-39/IGHV4-59/BLK/IGHA2/IGHV3-21/IGHV3-13/IGHV1-18 | 47    |
| BP       | GO:0009743 | Response to carbohydrate                     | 28/917    | 226/18,800 | 5.69E-06 | 0.000229 | 0.000197 | BRSK2/GPLD1/CMA1/KCNB1/SLC8A1/AQP4/CLTRN/GHRL/GRIK5/GPR27/NKX6-1/PCSK1/NEUROD1/NROB2/PRKCB/CASR/RFX6/ZBED6/EPHA5/CFTR/GCK/NKX2-2/NR1H4/ADIPOQ/PTPRN/SLC30A8/PCK1/UCN3                                                                                                                                                                       | 28    |
| BP       | GO:0001678 | Cellular glucose homeostasis                 | 22/917    | 154/18,800 | 5.78E-06 | 0.00023  | 0.000198 | BRSK2/GPLD1/CMA1/KLF15/CARTPT/KCNB1/AQP4/CLTRN/GHRL/GRIK5/GPR27/NEUROD1/CASR/RFX6/ZBED6/ABCC8/EPHA5/CFTR/GCK/NR1H4/PTPRN/PCK1                                                                                                                                                                                                               | 22    |
| BP       | GO:0050803 | Regulation of synapse structure or activity  | 27/917    | 215/18,800 | 6.45E-06 | 0.000255 | 0.000219 | NRCAM/CTTNBP2/NTRK2/AMIGO1/NLGN1/PAK3/RELN/KIF1A/ADGRB3/FLRT2/NRXN1/NEURL1/LRRTM2/CHRN2/GHRL/SLITRK1/MUSK/LRRK2/C1QL3/CBLN1/CTNNA2/ITPKA/GPM6A/CAMK2B/LHFPL4/CLK8/LRRTM3                                                                                                                                                                    | 27    |
| BP       | GO:0010975 | Regulation of neuron projection development  | 43/917    | 431/18,800 | 7.22E-06 | 0.000283 | 0.000244 | BRSK2/NRCAM/NTRK2/SERPINI1/AMIGO1/NLGN1/RTN4RL1/PAK3/MAP2/RELN/ALKAL2/KIF1A/SEMA6D/KIAA0319/EPO/ADGRB3/PACSIN1/TNR/RET/CHRN2/FSTL4/SLITRK1/BCL11A/MAPT/SFRP1/SEMA3E/LRRK2/CNTN2/DSCAM/ELAVL4/CSMD3/MIR210/CTNNA2/CXCL12/CNR1/SNAP25/LPAR3/ITPKA/SEZ6/CAMK2B/BMP5/CLK8/FUT9                                                                  | 43    |
| BP       | GO:0014046 | Dopamine secretion                           | 10/917    | 37/18,800  | 7.59E-06 | 0.000293 | 0.000252 | SYT6/KCNA2/ABAT/CHRN2/SYT4/SYT9/CXCL12/CNR1/SYT5/SYT8                                                                                                                                                                                                                                                                                       | 10    |
| BP       | GO:0014059 | Regulation of dopamine secretion             | 10/917    | 37/18,800  | 7.59E-06 | 0.000293 | 0.000252 | SYT6/KCNA2/ABAT/CHRN2/SYT4/SYT9/CXCL12/CNR1/SYT5/SYT8                                                                                                                                                                                                                                                                                       | 10    |
| BP       | GO:0016358 | Dendrite development                         | 28/917    | 231/18,800 | 8.65E-06 | 0.000331 | 0.000284 | CTNND2/NLGN1/PAK3/MAP2/RELN/KIF1A/KIAA0319/ADGRB3/GPR37/SDK1/PACSIN1/NEURL1/CHRN2/FSTL4/DCDC2/GHRL/BCL11A/LRRK2/MAPK8IP2/DSCAM/ELAVL4/CSMD3/CTNNA2/ITPKA/SEZ6/ACTL6B/CAMK2B/BMP5                                                                                                                                                            | 28    |

(Continued)



Supplementary Table S1 (Continued)

| Ontology | ID         | Description                                     | GeneRatio | BgRatio    | p-Value  | p.adjust | q-Value  | geneID                                                                                                                                                                                                                                                                                                                                    | Count |
|----------|------------|-------------------------------------------------|-----------|------------|----------|----------|----------|-------------------------------------------------------------------------------------------------------------------------------------------------------------------------------------------------------------------------------------------------------------------------------------------------------------------------------------------|-------|
| BP       | GO:0042310 | Vasoconstriction                                | 15/917    | 82/18,800  | 8.73E-06 | 0.000331 | 0.000285 | SCNN1B/P2RX1/CHRM3/TACR1/SLC6A4/SLC8A1/<br>CYSLTR1/AVPR1B/KCNA5/KCNMB2/CASR/FGA/FGB/<br>CRP/FGG                                                                                                                                                                                                                                           | 15    |
| BP       | GO:0042593 | Glucose homeostasis                             | 29/917    | 244/18,800 | 8.83E-06 | 0.000332 | 0.000286 | BHLHA15/BRSK2/PDK4/GPLD1/CMA1/KLF15/CARTPT/<br>KCNB1/AQP4/CLTRN/GHRL/GRIK5/GPR27/G6PC1/<br>NEUROD1/CNR1/CASR/RFX6/ZBED6/ABCC8/EPHA5/<br>CFTR/GCK/NR1H4/ADIPOQ/PTPRN/G6PC2/PCK1/<br>FFAR1                                                                                                                                                  | 29    |
| BP       | GO:0010038 | Response to metal ion                           | 37/917    | 351/18,800 | 9.16E-06 | 0.000342 | 0.000294 | KCNK3/MT1F/SYT6/NLGN1/GPLD1/BNIP3/ADGRV1/<br>ABAT/ADCY1/SLC30A2/MT1G/KIT/DLG2/SYT4/MAPT/<br>CRHBP/DPEP1/LRRK2/CNGA3/PCSK1/SYT9/KCNMB2/<br>OTC/MT1H/CASR/ABCC8/TRPV6/ASCL1/FGA/SYT5/<br>FGB/GLRA1/FABP4/SLC30A8/MTTP/SYT8/FGG                                                                                                              | 37    |
| BP       | GO:0033500 | Carbohydrate homeostasis                        | 29/917    | 245/18,800 | 9.56E-06 | 0.000354 | 0.000304 | BHLHA15/BRSK2/PDK4/GPLD1/CMA1/KLF15/CARTPT/<br>KCNB1/AQP4/CLTRN/GHRL/GRIK5/GPR27/G6PC1/<br>NEUROD1/CNR1/CASR/RFX6/ZBED6/ABCC8/EPHA5/<br>CFTR/GCK/NR1H4/ADIPOQ/PTPRN/G6PC2/PCK1/<br>FFAR1                                                                                                                                                  | 29    |
| BP       | GO:0030534 | Adult behavior                                  | 20/917    | 136/18,800 | 9.77E-06 | 0.000359 | 0.000309 | SLC1A2/FGF12/RNF180/ABAT/CARTPT/SDK1/<br>HOMER2/NRXN1/TMOD1/CHRN2/GHRL/SLITRK1/<br>CRHBP/CNTN2/CXCL12/GABRG2/SEZ6/NPY/GLRA1/<br>PAX5                                                                                                                                                                                                      | 20    |
| BP       | GO:0098815 | Modulation of excitatory postsynaptic potential | 10/917    | 39/18,800  | 1.27E-05 | 0.000462 | 0.000397 | NLGN1/RELN/SLC8A3/SLC8A2/NRXN1/CEL4/LRRK2/<br>CBLN1/RIMS2/RIMS1                                                                                                                                                                                                                                                                           | 10    |
| BP       | GO:0002443 | Leukocyte mediated immunity                     | 44/917    | 457/18,800 | 1.39E-05 | 0.000503 | 0.000432 | C5/PLA2G1B/SCNN1B/CX3CR1/CLU/C6/C7/KIT/CTSG/<br>DNASE1L3/CCR2/C8A/CD8A/IGHV3-64/PTPRC/C4BPA/<br>TLR8/IGHV6-1/IGHV2-5/IGHV3-74/CPLX2/SH2D1A/<br>IGHV4-4/CHGA/IGHV3-20/IGHV3-7/IGHV3-15/IGHV1-<br>45/IGHV3-72/IGHV3-48/APCS/IGHV2-26/IGHV3-49/<br>IGHV4-28/IGHV5-51/CRP/IGHV1-69/IGHV4-39/IGHV4-<br>59/BLK/IGHA2/IGHV3-21/IGHV3-13/IGHV1-18 | 44    |
| BP       | GO:0007611 | Learning or memory                              | 30/917    | 264/18,800 | 1.51E-05 | 0.00054  | 0.000464 | PRKAR2B/GRPR/NTRK2/CX3CR1/PAK5/GATM/RELN/<br>VIP/ADCY1/ADGRB3/SLC8A3/SLC8A2/TACR1/SLC6A4/<br>NRXN1/TNR/KIT/CHRN2/MUSK/SYT4/MAPT/CRHBP/<br>CNTN2/MAPK8IP2/ELAVL4/CNR1/SNAP25/ABCC8/<br>GLP1R/KLK8                                                                                                                                          | 30    |

**Supplementary Table S1** (Continued)

| Ontology | ID         | Description                                   | GeneRatio | BgRatio    | p-Value  | p.adjust | q-Value  | geneID                                                                                                                                                                                                                                                                             | Count |
|----------|------------|-----------------------------------------------|-----------|------------|----------|----------|----------|------------------------------------------------------------------------------------------------------------------------------------------------------------------------------------------------------------------------------------------------------------------------------------|-------|
| BP       | GO:1903305 | Regulation of regulated secretory pathway     | 20/917    | 140/18,800 | 1.52E-05 | 0.00054  | 0.000464 | CHRN3/P2RX1/SYT6/NLGN1/ADCY1/CACNB2/KCNB1/SCAMP5/SYT4/CCR2/LRRK2/SYP/SYT9/CNR1/PRKCB/TRPV6/SYT5/CDK5R2/SYT8/BLK                                                                                                                                                                    | 20    |
| BP       | GO:0051954 | Positive regulation of amine transport        | 10/917    | 40/18,800  | 1.62E-05 | 0.000571 | 0.000491 | VIP/ABAT/CARTPT/KCNB1/SLC38A3/CLTRN/CHRN2/SYT4/AVPR1B/CXCL12                                                                                                                                                                                                                       | 10    |
| BP       | GO:0050901 | Leukocyte tethering or rolling                | 9/917     | 33/18,800  | 2.01E-05 | 0.000704 | 0.000605 | CX3CR1/SELP/CCR2/ITGA4/MADCAM1/SELE/CXCL12/CCL21/FUT9                                                                                                                                                                                                                              | 9     |
| BP       | GO:0042113 | B cell activation                             | 35/917    | 336/18,800 | 2.05E-05 | 0.000707 | 0.000608 | FLT3/VAV3/KIT/CHRN2/SFRP1/LAX1/ITGA4/PRKCB/IGHV3-64/ONECUT1/PTPRC/IGHV6-1/IGHV2-5/IGHV3-74/IGHV4-4/IGHV3-20/IGHV3-7/IGHV3-15/CXCR5/IGHV1-45/IGHV3-72/IGHV3-48/IGHV2-26/IGHV3-49/IGHV4-28/MS4A1/IGHV5-51/IGHV1-69/IGHV4-39/IGHV4-59/BLK/IGHA2/IGHV3-21/IGHV3-13/IGHV1-18            | 35    |
| BP       | GO:0061564 | Axon development                              | 45/917    | 479/18,800 | 2.06E-05 | 0.000707 | 0.000608 | BRSK2/NRCAM/NTRK2/AMIGO1/RTN4RL1/PAK3/MAP2/RELN/SEMA6D/ADCY1/KIAA0319/NFASC/DSCAML1/NCAM1/FLRT2/NRXN1/TNR/RET/CHRN2/OLFM1/FSTL4/GDF7/SLITRK1/MAPT/SEMA3E/NKX6-1/CNTN2/KIF5C/APLP1/DSCAM/ITGA4/CTNNA2/DPYSL5/CXCL12/CNR1/GFRA3/LPAR3/FEZF1/EPHA5/CDK5R2/CNTN5/ARX/PLP1/UNC5D/KLK8   | 45    |
| BP       | GO:0042742 | Defense response to bacterium                 | 37/917    | 364/18,800 | 2.06E-05 | 0.000707 | 0.000608 | PLA2G1B/SCNN1B/REG3G/CD36/SELP/FCN2/CTSG/IGHV3-64/FGA/IGHV6-1/IGHV2-5/IGHV3-74/NR1H4/IGHV4-4/FCB/CHGA/IGHV3-20/IGHV3-7/IGHV3-15/IGHV1-45/JCHAIN/IGHV3-72/S100A14/IGHV3-48/IGHV2-26/IGHV3-49/IGHV4-28/ZG16/IGHV5-51/CRP/IGHV1-69/IGHV4-39/IGHV4-59/IGHA2/IGHV3-21/IGHV3-13/IGHV1-18 | 37    |
| BP       | GO:1990573 | Potassium ion import across plasma membrane   | 11/917    | 50/18,800  | 2.27E-05 | 0.000773 | 0.000665 | KCNJ5/KCNJ16/WNK2/FXYD2/ABCC9/KCNJ11/ATP1A3/KCNJ3/HCN4/ATP4A/KCNJ6                                                                                                                                                                                                                 | 11    |
| BP       | GO:0055067 | Monovalent inorganic cation homeostasis       | 21/917    | 157/18,800 | 2.60E-05 | 0.000878 | 0.000755 | SPX/SCNN1B/PDK4/RAB39A/TACR1/SLC8A1/FASLG/SLC26A4/SLC4A4/SLC4A10/SCNN1G/LRRK2/CCKBR/SCN7A/ATP1A3/AVPR1B/KCNA5/OTC/ATP4A/CYP4A11/CFTR                                                                                                                                               | 21    |
| BP       | GO:0045666 | Positive regulation of neuron differentiation | 15/917    | 91/18,800  | 3.19E-05 | 0.001062 | 0.000913 | NRCAM/NAP1L2/PROX1/SH3GL3/EPO/GDF7/NKX6-1/SOX11/NEUROD1/CXCL12/DUOXA1/PCP4/FEZF1/ASCL1/NKX2-2                                                                                                                                                                                      | 15    |

(Continued)

**Supplementary Table S1** (Continued)

| Ontology | ID         | Description                        | GeneRatio | BgRatio    | p-Value  | p.adjust | q-Value  | geneID                                                                                                                                                                                                                                                           | Count |
|----------|------------|------------------------------------|-----------|------------|----------|----------|----------|------------------------------------------------------------------------------------------------------------------------------------------------------------------------------------------------------------------------------------------------------------------|-------|
| BP       | GO:0070509 | Calcium ion import                 | 15/917    | 91/18,800  | 3.19E-05 | 0.001062 | 0.000913 | P2RX1/SLC8A3/SLC8A2/CACNB2/SLC8A1/EGF/SPINK1/CACNA1B/CXCL12/CASR/TRPV6/GCK/PLPP4/MRLN/MS4A1                                                                                                                                                                      | 15    |
| BP       | GO:0031016 | Pancreas development               | 14/917    | 81/18,800  | 3.37E-05 | 0.001113 | 0.000957 | PTF1A/PROX1/NR5A2/NKX6-1/PCSK1/NEUROD1/INSM1/ONECUT1/RFX6/ZBED6/FGF10/NKX2-2/BMP5/MSLN                                                                                                                                                                           | 14    |
| BP       | GO:0007409 | Axonogenesis                       | 41/917    | 430/18,800 | 3.39E-05 | 0.001113 | 0.000957 | BRSK2/NRCAM/NTRK2/AMIGO1/PAK3/MAP2/RELN/SEMA6D/ADCY1/KIAA0319/NFASC/DSCAML1/NCAM1/FLRT2/NRXN1/TNR/RET/CHRN2/OLFM1/FSTL4/GDF7/SLITRK1/MAPT/SEMA3E/NKX6-1/CNTN2/KIF5C/APLP1/DSCAM/ITGA4/CTNNA2/DPYSL5/CXCL12/GFRA3/LPAR3/FEZF1/EPHA5/CDK5R2/CNTN5/ARX/UNC5D        | 41    |
| BP       | GO:0015849 | Organic acid transport             | 33/917    | 318/18,800 | 3.77E-05 | 0.001229 | 0.001056 | SPX/SLC1A2/PLA2G1B/NTRK2/ABC1/SLC7A2/CD36/ABAT/ABCD2/SLC38A3/SLCO1C1/SLC26A4/NPY5R/CLTRN/SYT4/SLC6A15/SLC7A14/SLC29A4/SLC38A11/SLC22A9/SLC3A1/SLC38A4/NR0B2/AVPR1B/SLC5A8/SLC10A2/RBP2/CYP4A11/PMP2/SLC6A17/FABP4/PLA2G2D/SLC26A9                                | 33    |
| BP       | GO:0050890 | Cognition                          | 32/917    | 306/18,800 | 4.23E-05 | 0.00137  | 0.001178 | PRKAR2B/GRPR/NTRK2/CX3CR1/PAK5/GATM/RELN/VIP/ADCY1/ADGRB3/SLC8A3/SLC8A2/TACR1/SLC6A4/TUSC3/NRXN1/TNR/KIT/CHRN2/FAM107A/MUSK/SYT4/MAPT/CRHBP/CNTN2/MAPK8IP2/ELAVL4/CNR1/SNAP25/ABCC8/GLP1R/CLK8                                                                   | 32    |
| BP       | GO:0034329 | Cell junction assembly             | 40/917    | 420/18,800 | 4.33E-05 | 0.001389 | 0.001195 | ERBB4/NRCAM/CEL/NTRK2/CTNND2/AMIGO1/NLGN1/MPP7/GABRB3/ADGRB3/SDK1/FLRT2/BSN/NRXN1/PCDHB5/PCLO/LRRTM2/CHRN2/GHRL/SLITRK1/FAM107A/MUSK/CDH22/SFRP1/ANK2/DSCAM/CBLN1/IGFN1/MYOC/GABRG2/GPM6A/CDH10/CBLN4/NR1H4/CNTN5/CDH19/GABRA2/LHFPL4/COL17A1/LRRTM3             | 40    |
| BP       | GO:0009991 | Response to extracellular stimulus | 44/917    | 479/18,800 | 4.35E-05 | 0.001389 | 0.001195 | BHLHA15/SPX/SLC1A2/BRSK2/ELAPOR1/ACACB/SCNN1B/PDK4/CLPS/PROX1/BNIP3/ALB/KL/EPO/CARTPT/KCNB1/SLC6A4/SLC8A1/SLC38A3/GHRL/FAM107A/SFRP1/LRRK2/CNTN2/SPINK1/PCSK1/ITGA4/SSTR2/OTC/CNR1/CBS/CASR/SSTR3/PTPRC/ASCL1/SLC39A5/NR1H4/ADIPOQ/NPY/CLPSL1/PCK1/UCN3/SCTR/SST | 44    |

**Supplementary Table S1** (Continued)

| Ontology | ID         | Description                                         | GeneRatio | BgRatio    | p-Value  | p.adjust | q-Value  | geneID                                                                                                                                                                                                                                                                          | Count |
|----------|------------|-----------------------------------------------------|-----------|------------|----------|----------|----------|---------------------------------------------------------------------------------------------------------------------------------------------------------------------------------------------------------------------------------------------------------------------------------|-------|
| BP       | GO:0034764 | Positive regulation of transmembrane transport      | 25/917    | 213/18,800 | 4.44E-05 | 0.001409 | 0.001211 | SLC1A2/P2RX1/ABCB1/AMIGO1/NOS1/AKAP6/RELN/WNK2/RGN/KLF15/FXYD2/DMD/CACNB2/PIRT/CLTRN/PDZK1/ANK2/CCR2/MIR210/ABCC8/CFTR/IGF1/ADIPOQ/CXCL9/PLP1                                                                                                                                   | 25    |
| BP       | GO:0034767 | Positive regulation of ion transmembrane transport  | 21/917    | 163/18,800 | 4.57E-05 | 0.001436 | 0.001235 | P2RX1/ABCB1/AMIGO1/NOS1/AKAP6/RELN/WNK2/RGN/FXYD2/DMD/CACNB2/PIRT/CLTRN/PDZK1/ANK2/CCR2/MIR210/ABCC8/CFTR/CXCL9/PLP1                                                                                                                                                            | 21    |
| BP       | GO:0051223 | Regulation of protein transport                     | 45/917    | 495/18,800 | 4.59E-05 | 0.001436 | 0.001235 | MYRIP/BRSK2/PLA2G1B/CELA2A/GPLD1/CD36/ABAT/CARTPT/KCNB1/GHRL/PDZK1/SYT4/GPR27/SFRP1/LRRK2/NKX6-1/KCNJ11/PCSK1/STXB5L/NEUROD1/SYT9/NROB2/KCNA5/CNR1/SNAP25/CASR/RFX6/ZBED6/ABCC8/FGA/EPHA5/CFTR/GCK/NR1H4/IGF1/ADIPOQ/FGF/CHGA/G6PC2/SLC30A8/SFN/FFAR1/UCN3/BLK/FGG              | 45    |
| BP       | GO:0001764 | Neuron migration                                    | 21/917    | 164/18,800 | 5.01E-05 | 0.001555 | 0.001337 | NRCAM/NTRK2/NEXMIF/RELN/KIAA0319/FLRT2/DCDC2/ASTN1/NKX6-1/CNTN2/CTNNA2/CXCL12/GFRA3/FEZF1/GPM6A/DCX/ASCL1/CAMK2B/CDK5R2/ARX/UNC5D                                                                                                                                               | 21    |
| BP       | GO:0140115 | Export across plasma membrane                       | 13/917    | 74/18,800  | 5.35E-05 | 0.001651 | 0.001419 | ABCB1/KCNA2/SLC8A2/FXYD2/KCNB1/SLC8A1/KCND3/SLC4A4/PDZK1/SLC29A4/ATP1A3/KCNA5/ATP4A                                                                                                                                                                                             | 13    |
| BP       | GO:0050878 | Regulation of body fluid levels                     | 37/917    | 382/18,800 | 5.82E-05 | 0.001784 | 0.001533 | ERBB4/CELA2A/CEL/SCNN1B/P2RX1/F11/CD36/VIP/ABAT/CDO1/VAV3/CHRM3/TACR1/MMRN1/P2RY12/KLKB1/AQP4/SELP/PRLR/NEURL1/VTN/SCNN1G/CTSG/APOH/TFPI2/SPINK1/SERPINA10/FGA/CYP4A11/CFTR/FGF10/FGF/KRT1/SFN/KRT16/BLK/FGG                                                                    | 37    |
| BP       | GO:0002440 | Production of molecular mediator of immune response | 32/917    | 312/18,800 | 6.16E-05 | 0.001876 | 0.001613 | CD36/KIT/CCR2/IGKV2-28/IGKV2D-28/PTPRC/IGLV5-37/IGLV7-46/IGLV7-43/IGKV1D-39/IGKV1-12/IGKV1-39/IGKV5-2/IGLV2-8/IGKV1D-13/IGLV2-18/IGKV1-17/IGKV2-24/IGKV1-6/IGLV4-60/IGLV6-57/IGKV1-16/IGLV4-69/IGLV10-54/IGLV3-27/IGLV5-45/IGKV4-1/IGLV3-19/IGKV3D-20/IGKV1-27/IGKV1-9/IGLV8-61 | 32    |
| BP       | GO:0007626 | Locomotory behavior                                 | 23/917    | 192/18,800 | 6.45E-05 | 0.001951 | 0.001677 | SELENOP/PAK5/RELN/FGF12/ABAT/GPR37/TMOD1/TNR/USP2/CHRN2/SLC4A10/ASTN1/LRRK2/MCOLN3/CNTN2/DSCAM/ELAVL4/SLC18A2/CXCL12/SNAP25/NPY1R/SEZ6/GLRA1                                                                                                                                    | 23    |
| BP       | GO:1904862 | Inhibitory synapse assembly                         | 6/917     | 16/18,800  | 6.96E-05 | 0.002091 | 0.001798 | GABRB3/CBLN1/GABRG2/CBLN4/GABRA2/LHFPL4                                                                                                                                                                                                                                         | 6     |
| BP       | GO:0061045 | Negative regulation of wound healing                | 13/917    | 76/18,800  | 7.14E-05 | 0.002131 | 0.001832 | F11/ABAT/MMRN1/KLKB1/VTN/AJAP1/APOH/ABCC8/FGA/FGF/KRT1/APCS/FGG                                                                                                                                                                                                                 | 13    |

(Continued)

**Supplementary Table S1** (Continued)

| Ontology | ID         | Description                                                                                 | GeneRatio | BgRatio    | p-Value  | p.adjust | q-Value  | geneID                                                                                                                                                                   | Count |
|----------|------------|---------------------------------------------------------------------------------------------|-----------|------------|----------|----------|----------|--------------------------------------------------------------------------------------------------------------------------------------------------------------------------|-------|
| BP       | GO:0022898 | Regulation of transmembrane transporter activity                                            | 29/917    | 273/18,800 | 7.21E-05 | 0.002138 | 0.001838 | PM20D1/ABCB1/AMIGO1/NLGN1/KCNAB1/NOS1/AKAP6/RELN/FGF12/WNK2/RGN/CHRM3/EPO/FXYD2/DMD/CACNB2/PIRT/CLTRN/PDZK1/CRHBP/ANK2/CCR2/SHISA9/SCN3B/MAPK8IP2/CACNG5/ABCC8/CFTR/MRLN | 29    |
| BP       | GO:1902476 | Chloride transmembrane transport                                                            | 12/917    | 66/18,800  | 7.27E-05 | 0.002144 | 0.001843 | GABRB3/ANO5/ANO3/SLC26A4/GLRA3/GABRA4/CASR/GABRG2/CFTR/GLRA1/GABRA2/SLC26A9                                                                                              | 12    |
| BP       | GO:0071333 | Cellular response to glucose stimulus                                                       | 18/917    | 132/18,800 | 7.45E-05 | 0.002179 | 0.001874 | BRSK2/GPLD1/CMA1/KCNB1/AQP4/CLTRN/GHRL/GRIK5/GPR27/NEUROD1/CASR/RFX6/ZBED6/EPHA5/CFTR/NR1H4/PTPRN/PCK1                                                                   | 18    |
| BP       | GO:0051592 | Response to calcium ion                                                                     | 19/917    | 144/18,800 | 7.49E-05 | 0.002179 | 0.001874 | SYT6/NLGN1/GPLD1/ADGRV1/ADCY1/SYT4/CRHBP/DPEP1/PCSK1/SYT9/KCNMB2/CASR/TRPV6/FGA/SYT5/FGB/MTTP/SYT8/FGG                                                                   | 19    |
| BP       | GO:0061337 | Cardiac conduction                                                                          | 15/917    | 98/18,800  | 7.74E-05 | 0.002238 | 0.001924 | KCNJ5/SLC8A3/SLC8A2/CACNB2/SLC8A1/KCND3/ATP2B2/ABCC9/ANK2/SCN3B/ATP1A3/KCNA5/KCNJ3/HCN4/KCNH6                                                                            | 15    |
| BP       | GO:0051339 | Regulation of lyase activity                                                                | 13/917    | 77/18,800  | 8.21E-05 | 0.002359 | 0.002028 | GUCA1C/VIPR2/NOS1/ADGRV1/GALR1/TSHR/ADCYAP1/P2RY13/CCR2/MIR210/GLP1R/GUCA2A/GPR87                                                                                        | 13    |
| BP       | GO:0007187 | G protein-coupled receptor signaling pathway, coupled to cyclic nucleotide second messenger | 12/917    | 67/18,800  | 8.47E-05 | 0.002407 | 0.00207  | MTNR1A/CHRM3/TSHR/SSTR2/CHRM2/CNR1/NPY1R/AGTR2/LPAR3/SSTR3/XCR1/NPY                                                                                                      | 12    |
| BP       | GO:0086091 | Regulation of heart rate by cardiac conduction                                              | 9/917     | 39/18,800  | 8.48E-05 | 0.002407 | 0.00207  | KCNJ5/CACNB2/KCND3/ANK2/SCN3B/KCNA5/KCNJ3/HCN4/KCNH6                                                                                                                     | 9     |
| BP       | GO:0071331 | Cellular response to hexose stimulus                                                        | 18/917    | 134/18,800 | 9.08E-05 | 0.002562 | 0.002203 | BRSK2/GPLD1/CMA1/KCNB1/AQP4/CLTRN/GHRL/GRIK5/GPR27/NEUROD1/CASR/RFX6/ZBED6/EPHA5/CFTR/NR1H4/PTPRN/PCK1                                                                   | 18    |
| BP       | GO:0060402 | Calcium ion transport into cytosol                                                          | 21/917    | 171/18,800 | 9.24E-05 | 0.002592 | 0.002229 | PLA2G1B/P2RX1/NOS1/AKAP6/EPO/SLC8A3/SLC8A2/DMD/SLC8A1/FASLG/ANK2/MCOLN3/CACNA1B/CCR5/PTPRC/TRPV6/XCR1/CCL21/CXCL9/MS4A1/CCL19                                            | 21    |
| BP       | GO:0071322 | Cellular response to carbohydrate stimulus                                                  | 19/917    | 147/18,800 | 9.91E-05 | 0.002764 | 0.002376 | BRSK2/GPLD1/CMA1/KCNB1/AQP4/CLTRN/GHRL/GRIK5/GPR27/NEUROD1/PRKCB/CASR/RFX6/ZBED6/EPHA5/CFTR/NR1H4/PTPRN/PCK1                                                             | 19    |

**Supplementary Table S1** (Continued)

| Ontology | ID         | Description                                                         | GeneRatio | BgRatio    | p-Value  | p.adjust | q-Value  | geneID                                                                                                                                                                                                                                                     | Count |
|----------|------------|---------------------------------------------------------------------|-----------|------------|----------|----------|----------|------------------------------------------------------------------------------------------------------------------------------------------------------------------------------------------------------------------------------------------------------------|-------|
| BP       | GO:0008016 | Regulation of heart contraction                                     | 24/917    | 211/18,800 | 0.000103 | 0.002807 | 0.002413 | SPX/MYH7/KCNJ5/NOS1/MYH6/SLC8A3/SLC8A2/DMD/CACNB2/SLC8A1/KCND3/ATP2B2/ABCC9/ANK2/SCN3B/ATP1A3/KCNA5/KCNJ3/CHRM2/HCN4/AGTR2/KCNH6/GLP1R/CHGA                                                                                                                | 24    |
| BP       | GO:0050679 | Positive regulation of epithelial cell proliferation                | 24/917    | 211/18,800 | 0.000103 | 0.002807 | 0.002413 | PROX1/REG3G/VIP/STOX1/TACR1/REG3A/EGF/GHRL/SFRP1/HPN/SPINK1/SOX11/ITGA4/ZBED9/VEGFD/CXCL12/SCG2/THBS4/PKHD1/FGF10/IGF1/BMP5/PTPRN/FGFBP1                                                                                                                   | 24    |
| BP       | GO:0007158 | Neuron cell–cell adhesion                                           | 6/917     | 17/18,800  | 0.000103 | 0.002807 | 0.002413 | CEL/NLGN1/NRXN1/TNR/RET/ASTN1                                                                                                                                                                                                                              | 6     |
| BP       | GO:0048791 | Calcium ion-regulated exocytosis of neurotransmitter                | 6/917     | 17/18,800  | 0.000103 | 0.002807 | 0.002413 | SYT4/UNC13A/RIMS2/RIMS1/SYT5/SYT8                                                                                                                                                                                                                          | 6     |
| BP       | GO:0017158 | Regulation of calcium ion-dependent exocytosis                      | 9/917     | 40/18,800  | 0.000105 | 0.002834 | 0.002436 | SYT6/KCNB1/SCAMP5/SYT4/SYT9/TRPV6/SYT5/CDK5R2/SYT8                                                                                                                                                                                                         | 9     |
| BP       | GO:0042730 | Fibrinolysis                                                        | 7/917     | 24/18,800  | 0.000107 | 0.002879 | 0.002475 | F11/KLKB1/APOH/FGA/FGB/KRT1/FGG                                                                                                                                                                                                                            | 7     |
| BP       | GO:1904064 | Positive regulation of cation transmembrane transport               | 19/917    | 148/18,800 | 0.000109 | 0.002907 | 0.002499 | P2RX1/AMIGO1/NOS1/AKAP6/RELN/WNK2/RGN/FXYD2/DMD/CACNB2/PIRT/CLTRN/PDZK1/ANK2/CCR2/MIR210/ABCC8/CXCL9/PLP1                                                                                                                                                  | 19    |
| BP       | GO:0071326 | Cellular response to monosaccharide stimulus                        | 18/917    | 136/18,800 | 0.00011  | 0.002931 | 0.00252  | BRSK2/GPLD1/CMA1/KCNB1/AQP4/CLTRN/GHRL/GRIK5/GPR27/NEUROD1/CASR/RFX6/ZBED6/EPHA5/CFTR/NR1H4/PTPRN/PCK1                                                                                                                                                     | 18    |
| BP       | GO:0002449 | Lymphocyte mediated immunity                                        | 35/917    | 365/18,800 | 0.000112 | 0.002949 | 0.002536 | C5/CLU/C6/C7/CCR2/C8A/CD8A/IGHV3-64/PTPRC/C4BPA/TLR8/IGHV6-1/IGHV2-5/IGHV3-74/SH2D1A/IGHV4-4/IGHV3-20/IGHV3-7/IGHV3-15/IGHV1-45/IGHV3-72/IGHV3-48/APCS/IGHV2-26/IGHV3-49/IGHV4-28/IGHV5-51/CRP/IGHV1-69/IGHV4-39/IGHV4-59/IGHA2/IGHV3-21/IGHV3-13/IGHV1-18 | 35    |
| BP       | GO:0035773 | Insulin secretion involved in cellular response to glucose stimulus | 11/917    | 59/18,800  | 0.000114 | 0.002998 | 0.002578 | BRSK2/GPLD1/CLTRN/GHRL/GPR27/RFX6/ZBED6/EPHA5/CFTR/NR1H4/PTPRN                                                                                                                                                                                             | 11    |
| BP       | GO:0050806 | Positive regulation of synaptic transmission                        | 20/917    | 161/18,800 | 0.000115 | 0.003002 | 0.002581 | NTRK2/NLGN1/CX3CR1/RELN/ADCY1/SLC8A3/SLC8A2/TACR1/CACNB2/NRXN1/TNR/LRRTM2/FAM107A/CCR2/SCGN/CACNG5/CNR1/RIMS2/SNAP25/RIMS1                                                                                                                                 | 20    |

(Continued)



**Supplementary Table S1** (Continued)

| Ontology | ID         | Description                                                                                                               | GeneRatio | BgRatio    | p-Value  | p.adjust | q-Value  | geneID                                                                                                                                                                                                                                                                   | Count |
|----------|------------|---------------------------------------------------------------------------------------------------------------------------|-----------|------------|----------|----------|----------|--------------------------------------------------------------------------------------------------------------------------------------------------------------------------------------------------------------------------------------------------------------------------|-------|
| BP       | GO:0031639 | Plasminogen activation                                                                                                    | 7/917     | 25/18,800  | 0.000142 | 0.003681 | 0.003165 | F11/KLKB1/APOH/HPN/FGA/FGB/FGG                                                                                                                                                                                                                                           | 7     |
| BP       | GO:0060074 | Synapse maturation                                                                                                        | 7/917     | 25/18,800  | 0.000142 | 0.003681 | 0.003165 | SYBU/CX3CR1/RELN/NRXN1/NEURL1/SEZ6/CAMK2B                                                                                                                                                                                                                                | 7     |
| BP       | GO:0002460 | Adaptive immune response based on somatic recombination of immune receptors built from immunoglobulin superfamily domains | 35/917    | 370/18,800 | 0.000146 | 0.003744 | 0.003219 | C5/CLU/C6/C7/CCR2/C8A/CD8A/IGHV3-64/PTPRC/C4BPA/TLR8/IGHV6-1/IGHV2-5/IGHV3-74/IGHV4-4/IGHV3-20/IGHV3-7/IGHV3-15/IGHV1-45/IGHV3-72/IGHV3-48/APCS/IGHV2-26/IGHV3-49/IGHV4-28/IGHV5-51/CRP/IGHV1-69/IGHV4-39/IGHV4-59/IGHA2/IGHV3-21/IGHV3-13/CCL19/IGHV1-18                | 35    |
| BP       | GO:0051251 | Positive regulation of lymphocyte activation                                                                              | 35/917    | 371/18,800 | 0.000153 | 0.00392  | 0.00337  | VAV3/ZBTB16/EPO/TACR1/CHRN2/CCR2/TNFSF9/IGHV3-64/PTPRC/IGHV6-1/IGHV2-5/IGHV3-74/FGF10/IGF1/IGHV4-4/IGHV3-20/IGHV3-7/IGHV3-15/CCL21/IGHV1-45/IGHV3-72/PCK1/IGHV3-48/IGHV2-26/IGHV3-49/IGHV4-28/IGHV5-51/IGHV1-69/IGHV4-39/IGHV4-59/IGHA2/IGHV3-21/IGHV3-13/CCL19/IGHV1-18 | 35    |
| BP       | GO:0042445 | Hormone metabolic process                                                                                                 | 25/917    | 230/18,800 | 0.000154 | 0.00392  | 0.00337  | SCNN1B/GCNT4/PNLIP/MBOAT4/CHST9/CMA1/ADH1A/SLCO1C1/ADH1B/CTSG/HPN/PCSK1/UGT2B15/TPO/PRLHR/CPE/UGT2B11/CYP2C8/DUOXA1/PCSK2/SCG5/BMP5/TTR/UGT2B17/SLC30A8                                                                                                                  | 25    |
| BP       | GO:0048488 | Synaptic vesicle endocytosis                                                                                              | 11/917    | 61/18,800  | 0.000156 | 0.00392  | 0.00337  | CEL/NLGN1/DNAJC6/SH3GL3/PACIN1/LRRK2/SYP/SNAP91/SH3GL2/SYT5/SYT8                                                                                                                                                                                                         | 11    |
| BP       | GO:0140238 | Presynaptic endocytosis                                                                                                   | 11/917    | 61/18,800  | 0.000156 | 0.00392  | 0.00337  | CEL/NLGN1/DNAJC6/SH3GL3/PACIN1/LRRK2/SYP/SNAP91/SH3GL2/SYT5/SYT8                                                                                                                                                                                                         | 11    |
| BP       | GO:0031667 | Response to nutrient levels                                                                                               | 40/917    | 446/18,800 | 0.000159 | 0.003985 | 0.003426 | BHLHA15/SPX/BRSK2/ELAPOR1/ACACB/SCNN1B/PDK4/CLPS/PROX1/BNIP3/ALB/KL/EPO/CARTPT/KCNB1/SLC6A4/SLC8A1/SLC38A3/GHRL/FAM107A/SFRP1/LRRK2/CNTN2/SPINK1/PCSK1/SSTR2/OTC/CNR1/CASR/SSTR3/ASCL1/SLC39A5/NR1H4/ADIPOQ/NPY/CLPSL1/PCK1/UCN3/SCTR/SST                                | 40    |
| BP       | GO:0002027 | Regulation of heart rate                                                                                                  | 15/917    | 105/18,800 | 0.000172 | 0.00427  | 0.003671 | SPX/MYH7/KCNJ5/MYH6/DMD/CACNB2/SLC8A1/KCND3/ANK2/SCN3B/KCNA5/KCNJ3/HCN4/AGTR2/KCNH6                                                                                                                                                                                      | 15    |
| BP       | GO:1903034 | Regulation of response to wounding                                                                                        | 20/917    | 166/18,800 | 0.000175 | 0.004291 | 0.003689 | F11/RTN4RL1/REG3G/CD36/ABAT/KIAA0319/MMRN1/REG3A/KLKB1/TNR/VTN/AJAP1/APOH/ABCC8/FGA/FGB/KRT1/APCS/KLK8/FGG                                                                                                                                                               | 20    |

**Supplementary Table S1** (Continued)

| Ontology | ID         | Description                                                   | GeneRatio | BgRatio    | p-Value  | p.adjust | q-Value  | geneID                                                                                                                                                                                                                                      | Count |
|----------|------------|---------------------------------------------------------------|-----------|------------|----------|----------|----------|---------------------------------------------------------------------------------------------------------------------------------------------------------------------------------------------------------------------------------------------|-------|
| BP       | GO:0035296 | Regulation of tube diameter                                   | 18/917    | 141/18,800 | 0.000175 | 0.004291 | 0.003689 | SCNN1B/P2RX1/NOS1/UTS2R/CHRM3/TACR1/SLC6A4/SLC8A1/CYSLTR1/AVPR1B/KCNA5/KCNMB2/AGTR2/CASR/FGA/FGB/CRP/FGG                                                                                                                                    | 18    |
| BP       | GO:0097746 | Blood vessel diameter maintenance                             | 18/917    | 141/18,800 | 0.000175 | 0.004291 | 0.003689 | SCNN1B/P2RX1/NOS1/UTS2R/CHRM3/TACR1/SLC6A4/SLC8A1/CYSLTR1/AVPR1B/KCNA5/KCNMB2/AGTR2/CASR/FGA/FGB/CRP/FGG                                                                                                                                    | 18    |
| BP       | GO:0045664 | Regulation of neuron differentiation                          | 22/917    | 192/18,800 | 0.000177 | 0.004291 | 0.003689 | NRCAM/NAP1L2/NLGN1/PROX1/SH3GL3/EPO/SLC6A4/RET/GDF7/BCL11A/SFRP1/LRRK2/NKX6-1/CNTN2/SOX11/NEUROD1/CXCL12/DUOX1/PCP4/FEZF1/ASCL1/NKX2-2                                                                                                      | 22    |
| BP       | GO:0032411 | Positive regulation of transporter activity                   | 16/917    | 117/18,800 | 0.000178 | 0.004291 | 0.003689 | ABCB1/AMIGO1/AKAP6/RELN/WNK2/RGN/FXYD2/DMD/CACNB2/PIRT/PDZK1/ANK2/CCR2/ABCC8/CFTR/ADIPOQ                                                                                                                                                    | 16    |
| BP       | GO:0035249 | Synaptic transmission, glutamatergic                          | 14/917    | 94/18,800  | 0.000179 | 0.004291 | 0.003689 | P2RX1/NLGN1/RELN/NRXN1/TNR/GRIK5/UNC13A/CCR2/LRRK2/MAPK8IP2/CACNG5/GRIA2/CNR1/GRM4                                                                                                                                                          | 14    |
| BP       | GO:1901606 | Alpha-amino acid catabolic process                            | 14/917    | 94/18,800  | 0.000179 | 0.004291 | 0.003689 | GLS2/TDH/NOS1/CDO1/HOGA1/PAH/HPD/ASPA/HMGCLL1/MAT1A/PRODH2/OTC/CBS/GAD2                                                                                                                                                                     | 14    |
| BP       | GO:0045921 | Positive regulation of exocytosis                             | 13/917    | 83/18,800  | 0.00018  | 0.004304 | 0.0037   | NLGN1/CACNB2/KCNB1/SCAMP5/SYT4/CADPS/SYT9/CNR1/FGA/CFTR/FGB/CDK5R2/FGG                                                                                                                                                                      | 13    |
| BP       | GO:0016486 | Peptide hormone processing                                    | 8/917     | 34/18,800  | 0.000182 | 0.004312 | 0.003707 | MBOAT4/CMA1/CTSG/PCSK1/CPE/PCSK2/SCG5/SLC30A8                                                                                                                                                                                               | 8     |
| BP       | GO:0032414 | Positive regulation of ion transmembrane transporter activity | 15/917    | 106/18,800 | 0.000191 | 0.004509 | 0.003877 | ABCB1/AMIGO1/AKAP6/RELN/WNK2/RGN/FXYD2/DMD/CACNB2/PIRT/PDZK1/ANK2/CCR2/ABCC8/CFTR                                                                                                                                                           | 15    |
| BP       | GO:0035150 | Regulation of tube size                                       | 18/917    | 142/18,800 | 0.000192 | 0.004509 | 0.003877 | SCNN1B/P2RX1/NOS1/UTS2R/CHRM3/TACR1/SLC6A4/SLC8A1/CYSLTR1/AVPR1B/KCNA5/KCNMB2/AGTR2/CASR/FGA/FGB/CRP/FGG                                                                                                                                    | 18    |
| BP       | GO:0060047 | Heart contraction                                             | 26/917    | 247/18,800 | 0.000193 | 0.004521 | 0.003887 | SPX/MYH7/KCNJ5/MYLK2/NOS1/FGF12/MYH6/SLC8A3/SLC8A2/DMD/CACNB2/SLC8A1/KCND3/ATP2B2/ABCC9/ANK2/SCN3B/ATP1A3/KCNA5/KCNJ3/CHRM2/HCN4/AGTR2/KCNH6/GLP1R/CHGA                                                                                     | 26    |
| BP       | GO:0015711 | Organic anion transport                                       | 34/917    | 361/18,800 | 0.000196 | 0.004549 | 0.003911 | SLC1A2/PLA2G1B/NTRK2/SLC16A12/SLC7A2/CA4/SLCO4C1/CD36/ABAT/SLC38A3/SLCO1C1/SLC2A2/SLC26A4/NPY5R/SLC4A4/CLTRN/SLC4A10/SLC17A4/SYT4/SLC6A15/SLC17A1/SLC22A9/SLC3A1/NR0B2/AVPR1B/SLC5A8/SLC10A2/CASR/CYP4A11/CFTR/SLC6A17/MTTP/PLA2G2D/SLC26A9 | 34    |

(Continued)

**Supplementary Table S1** (Continued)

| Ontology | ID         | Description                                              | GeneRatio | BgRatio    | p-Value  | p.adjust | q-Value  | geneID                                                                                                                                                                                                                                                                                          | Count |
|----------|------------|----------------------------------------------------------|-----------|------------|----------|----------|----------|-------------------------------------------------------------------------------------------------------------------------------------------------------------------------------------------------------------------------------------------------------------------------------------------------|-------|
| BP       | GO:0050867 | Positive regulation of cell activation                   | 39/917    | 436/18,800 | 0.000202 | 0.004663 | 0.004009 | VAV3/ZBTB16/EPO/TACR1/SELP/CHRN2/CCR2/LRRK2/IL33/TNFSF9/IGHV3-64/PTPRC/SPACA3/IGHV6-1/IGHV2-5/IGHV3-74/FGF10/IGF1/IGHV4-4/IGHV3-20/IGHV3-7/IGHV3-15/CCL21/IGHV1-45/IGHV3-72/PCK1/IGHV3-48/IGHV2-26/IGHV3-49/IGHV4-28/IGHV5-51/IGHV1-69/IGHV4-39/IGHV4-59/IGHA2/IGHV3-21/IGHV3-13/CCL19/IGHV1-18 | 39    |
| BP       | GO:0002696 | Positive regulation of leukocyte activation              | 38/917    | 421/18,800 | 0.000203 | 0.004663 | 0.004009 | VAV3/ZBTB16/EPO/TACR1/CHRN2/CCR2/LRRK2/IL33/TNFSF9/IGHV3-64/PTPRC/SPACA3/IGHV6-1/IGHV2-5/IGHV3-74/FGF10/IGF1/IGHV4-4/IGHV3-20/IGHV3-7/IGHV3-15/CCL21/IGHV1-45/IGHV3-72/PCK1/IGHV3-48/IGHV2-26/IGHV3-49/IGHV4-28/IGHV5-51/IGHV1-69/IGHV4-39/IGHV4-59/IGHA2/IGHV3-21/IGHV3-13/CCL19/IGHV1-18      | 38    |
| BP       | GO:0006837 | Serotonin transport                                      | 6/917     | 19/18,800  | 0.000208 | 0.004669 | 0.004014 | P2RX1/NOS1/SLC6A4/SLC29A4/SLC18A2/CNR1                                                                                                                                                                                                                                                          | 6     |
| BP       | GO:0010738 | Regulation of protein kinase A signaling                 | 6/917     | 19/18,800  | 0.000208 | 0.004669 | 0.004014 | AKAP6/ADGRV1/AKAP7/LRRK2/ADIPOQ/IAPP                                                                                                                                                                                                                                                            | 6     |
| BP       | GO:0086014 | Atrial cardiac muscle cell action potential              | 6/917     | 19/18,800  | 0.000208 | 0.004669 | 0.004014 | KCNJ5/CACNB2/ANK2/SCN3B/KCNA5/KCNJ3                                                                                                                                                                                                                                                             | 6     |
| BP       | GO:0086026 | Atrial cardiac muscle cell to AV node cell signaling     | 6/917     | 19/18,800  | 0.000208 | 0.004669 | 0.004014 | KCNJ5/CACNB2/ANK2/SCN3B/KCNA5/KCNJ3                                                                                                                                                                                                                                                             | 6     |
| BP       | GO:0086066 | Atrial cardiac muscle cell to AV node cell communication | 6/917     | 19/18,800  | 0.000208 | 0.004669 | 0.004014 | KCNJ5/CACNB2/ANK2/SCN3B/KCNA5/KCNJ3                                                                                                                                                                                                                                                             | 6     |
| BP       | GO:0051965 | Positive regulation of synapse assembly                  | 11/917    | 63/18,800  | 0.00021  | 0.004695 | 0.004037 | NTRK2/AMIGO1/NLGN1/ADGRB3/FLRT2/NRXN1/LRRTM2/GHRL/SLITRK1/CBLN1/LRRTM3                                                                                                                                                                                                                          | 11    |
| BP       | GO:0032409 | Regulation of transporter activity                       | 30/917    | 305/18,800 | 0.000217 | 0.004824 | 0.004148 | PM20D1/ABC1/AMIGO1/NLGN1/KCNAB1/NOS1/AKAP6/RELN/FGF12/WNK2/RGN/CHRM3/EPO/FXYD2/DMD/CACNB2/PIRT/CLTRN/PDZK1/CRHBP/ANK2/CCR2/SHISA9/SCN3B/MAPK8IP2/CACNG5/ABCC8/CFTR/ADIPOQ/MRLN                                                                                                                  | 30    |
| BP       | GO:0032412 | Regulation of ion transmembrane transporter activity     | 27/917    | 263/18,800 | 0.000222 | 0.004907 | 0.004219 | ABC1/AMIGO1/NLGN1/KCNAB1/NOS1/AKAP6/RELN/FGF12/WNK2/RGN/CHRM3/EPO/FXYD2/DMD/CACNB2/PIRT/PDZK1/CRHBP/ANK2/CCR2/SHISA9/SCN3B/MAPK8IP2/CACNG5/ABCC8/CFTR/MRLN                                                                                                                                      | 27    |

**Supplementary Table S1** (Continued)

| Ontology | ID         | Description                                     | GeneRatio | BgRatio    | p-Value  | p.adjust | q-Value  | geneID                                                                                                                                                                                                                                               | Count |
|----------|------------|-------------------------------------------------|-----------|------------|----------|----------|----------|------------------------------------------------------------------------------------------------------------------------------------------------------------------------------------------------------------------------------------------------------|-------|
| BP       | GO:0006937 | Regulation of muscle contraction                | 20/917    | 170/18,800 | 0.000241 | 0.005266 | 0.004527 | SPX/MYH7/P2RX1/MYLK2/NOS1/ABAT/CHRM3/SLC8A3/TACR1/DMD/SLC8A1/SCN4A/KIT/GHRL/ANK2/SSTR2/CHRM2/HCN4/KCNB2/CHGA                                                                                                                                         | 20    |
| BP       | GO:0048469 | Cell maturation                                 | 21/917    | 183/18,800 | 0.000241 | 0.005266 | 0.004527 | BHLHA15/NRCAM/EPO/ADGRB3/PDE3A/RET/BCL11A/LRRK2/NKX6-1/CNTN2/SPINK1/MYOC/ASCL1/CFTR/ACTL6B/TDRD1/CCL21/FEV/PAEP/FGG/CCL19                                                                                                                            | 21    |
| BP       | GO:0019229 | Regulation of vasoconstriction                  | 11/917    | 64/18,800  | 0.000243 | 0.005266 | 0.004527 | P2RX1/CHRM3/TACR1/CYSLTR1/AVPR1B/KCNA5/KCNMB2/CASR/FGA/FGB/FGG                                                                                                                                                                                       | 11    |
| BP       | GO:0031638 | Zymogen activation                              | 11/917    | 64/18,800  | 0.000243 | 0.005266 | 0.004527 | CUZD1/F11/KLKB1/KLK1/APOH/HPN/FGA/PRSS3/FGB/KLK2/FGG                                                                                                                                                                                                 | 11    |
| BP       | GO:0051960 | Regulation of nervous system development        | 39/917    | 440/18,800 | 0.000243 | 0.005266 | 0.004527 | NTRK2/AMIGO1/NLGN1/CX3CR1/PAK3/MAP2/RELN/SEMA6D/KIAA0319/ADGRB3/FLRT2/NRXN1/TNR/NEURL1/LRRTM2/KIT/FSTL4/GHRL/ELAPOR2/SLITRK1/ASPA/SYT4/MAPT/SEMA3E/NKX6-1/SOX11/DSCAM/CBLN1/CXCL12/LPAR3/FEZF1/ITPKA/ABCC8/ASCL1/RXRG/NKX2-2/CAMK2B/KLK8/LRRTM3      | 39    |
| BP       | GO:0006968 | Cellular defense response                       | 10/917    | 54/18,800  | 0.000246 | 0.005287 | 0.004545 | UMOD/CX3CR1/PNLIPRP2/DCDC2/CCR2/IL33/CCR5/SH2D1A/TRAT1/CXCL9                                                                                                                                                                                         | 10    |
| BP       | GO:0033605 | Positive regulation of catecholamine secretion  | 5/917     | 13/18,800  | 0.000253 | 0.005423 | 0.004663 | VIP/CARTPT/KCNB1/CHRN2/CXCL12                                                                                                                                                                                                                        | 5     |
| BP       | GO:0090066 | Regulation of anatomical structure size         | 42/917    | 487/18,800 | 0.000257 | 0.005476 | 0.004708 | NRCAM/SCNN1B/P2RX1/NPHS1/NOS1/PAK3/MAP2/UTS2R/SEMA6D/VAV3/KIAA0319/CHRM3/SPTB/TACR1/SLC6A4/SLC8A1/TMOD1/AQP4/TNR/RET/CYSLTR1/OLFM1/FSTL4/MAPT/SEMA3E/LRRK2/NKX6-1/CNTN2/DSCAM/AVPR1B/KCNA5/CXCL12/KCNMB2/AGTR2/LPAR3/CASR/FGA/FGB/CCL21/SCTR/CRP/FGG | 42    |
| BP       | GO:1904062 | Regulation of cation transmembrane transport    | 33/917    | 352/18,800 | 0.000263 | 0.005575 | 0.004793 | P2RX1/PM20D1/AMIGO1/NLGN1/KCNAB1/NOS1/AKAP6/RELN/FGF12/WNK2/RGN/DPP10/EPO/FXYD2/DMD/CACNB2/SLC8A1/PIRT/CLTRN/PDZK1/CRHBP/ANK2/CCR2/SHISA9/SCN3B/MAPK8IP2/MIR210/CACNG5/DPP6/ABCC8/MRLN/CXCL9/PLP1                                                    | 33    |
| BP       | GO:0042551 | Neuron maturation                               | 9/917     | 45/18,800  | 0.000273 | 0.005761 | 0.004953 | NRCAM/ADGRB3/RET/BCL11A/LRRK2/CNTN2/MYOC/ACTL6B/FEV                                                                                                                                                                                                  | 9     |
| BP       | GO:0086010 | Membrane depolarization during action potential | 8/917     | 36/18,800  | 0.000278 | 0.005815 | 0.005    | SCN3A/CACNB2/SLC8A1/SCN4A/ANK2/SCN3B/SCN7A/HCN4                                                                                                                                                                                                      | 8     |
| BP       | GO:0140448 | Signaling receptor ligand precursor processing  | 8/917     | 36/18,800  | 0.000278 | 0.005815 | 0.005    | MBOAT4/CMA1/CTSG/PCSK1/CPE/PCSK2/SCG5/SLC30A8                                                                                                                                                                                                        | 8     |

(Continued)

Supplementary Table S1 (Continued)

| Ontology | ID         | Description                                       | GeneRatio | BgRatio    | p-Value  | p.adjust | q-Value  | geneID                                                                                                                                                                                                                                  | Count |
|----------|------------|---------------------------------------------------|-----------|------------|----------|----------|----------|-----------------------------------------------------------------------------------------------------------------------------------------------------------------------------------------------------------------------------------------|-------|
| BP       | GO:0010232 | Vascular transport                                | 13/917    | 87/18,800  | 0.000292 | 0.006053 | 0.005204 | SLC1A2/ABCB1/SLC16A12/SLC7A2/CD36/SLC8A2/SLC38A3/SLCO1C1/SLC4A4/ABCC9/SLC29A4/AVPR1B/SLC6A17                                                                                                                                            | 13    |
| BP       | GO:0150104 | Transport across blood-brain barrier              | 13/917    | 87/18,800  | 0.000292 | 0.006053 | 0.005204 | SLC1A2/ABCB1/SLC16A12/SLC7A2/CD36/SLC8A2/SLC38A3/SLCO1C1/SLC4A4/ABCC9/SLC29A4/AVPR1B/SLC6A17                                                                                                                                            | 13    |
| BP       | GO:0048588 | Developmental cell growth                         | 24/917    | 227/18,800 | 0.000314 | 0.006496 | 0.005585 | NRCAM/SORBS2/AKAP6/MAP2/SEMA6D/KIAA0319/TNR/OLFM1/FSTL4/BCL11A/SYT4/MAPT/SEMA3E/UNC13A/SPAG6/NKX6-1/DSCAM/ITGA4/CXCL12/RIMS2/RIMS1/SH3GL2/LPAR3/IGF1                                                                                    | 24    |
| BP       | GO:0006821 | Chloride transport                                | 15/917    | 111/18,800 | 0.000319 | 0.006548 | 0.005629 | ABCB1/GABRB3/ANO5/ANO3/SLC26A4/SLC4A10/GLRA3/GABRA4/CASR/GABRG2/CFTR/CLIC3/GLRA1/GABRA2/SLC26A9                                                                                                                                         | 15    |
| BP       | GO:0010876 | Lipid localization                                | 39/917    | 446/18,800 | 0.00032  | 0.006548 | 0.005629 | SPX/PLA2G1B/FITM1/CEL/ACACB/PNLIP/ABCB1/ABCA3/CLU/CD36/XKR4/LPA/ABCD2/TTPA/ANO3/FASLG/SLCO1C1/GALR1/GHRL/APOH/ABCA8/SLC22A9/NROB2/AVPR1B/XKR7/SLC5A8/SLC10A2/RBP2/CYP4A11/CFTR/ADIPOQ/VSTM2A/PMP2/FABP4/MTTP/PLA2G2D/SERPINA5/CIDEA/CRP | 39    |
| BP       | GO:2000300 | Regulation of synaptic vesicle exocytosis         | 10/917    | 56/18,800  | 0.000335 | 0.006822 | 0.005865 | CHRN3/P2RX1/NLGN1/ADCY1/CACNB2/SYT4/LRRK2/SYP/CNR1/PRKCB                                                                                                                                                                                | 10    |
| BP       | GO:0051962 | Positive regulation of nervous system development | 27/917    | 270/18,800 | 0.000338 | 0.006863 | 0.005901 | NTRK2/AMIGO1/NLGN1/CX3CR1/PAK3/RELN/ADGRB3/FLRT2/NRXN1/NEURL1/LRRTM2/KIT/GHRL/SLITRK1/ASPA/MAPT/NKX6-1/SOX11/DSCAM/CBLN1/CXCL12/LPAR3/ITPKA/ASCL1/NKX2-2/CAMK2B/LRRTM3                                                                  | 27    |
| BP       | GO:0046683 | Response to organophosphorus                      | 16/917    | 124/18,800 | 0.000349 | 0.007055 | 0.006066 | AQP8/P2RX1/AKAP6/CDO1/P2RY12/PDE3A/SLC6A4/SLC8A1/CRHBP/ABCC9/KCNJ11/CNGA3/HCN4/CFTR/ADIPOQ/PCK1                                                                                                                                         | 16    |
| BP       | GO:0009063 | Cellular amino acid catabolic process             | 15/917    | 112/18,800 | 0.000353 | 0.007095 | 0.0061   | GLS2/TDH/NOS1/ABAT/CDO1/HOGA1/PAH/HPD/ASPA/HMGCLL1/MAT1A/PRODH2/OTC/CBS/GAD2                                                                                                                                                            | 15    |
| BP       | GO:0003015 | Heart process                                     | 26/917    | 257/18,800 | 0.000361 | 0.007237 | 0.006222 | SPX/MYH7/KCNJ5/MYLK2/NOS1/FGF12/MYH6/SLC8A3/SLC8A2/DMD/CACNB2/SLC8A1/KCND3/ATP2B2/ABCC9/ANK2/SCN3B/ATP1A3/KCNA5/KCNJ3/CHRM2/HCN4/AGTR2/KCNH6/GLP1R/CHGA                                                                                 | 26    |
| BP       | GO:0048638 | Regulation of developmental growth                | 31/917    | 329/18,800 | 0.000365 | 0.007281 | 0.00626  | ERBB4/NRCAM/ACACB/PROX1/AKAP6/MAP2/MYH6/TGFBR3/GAMT/SEMA6D/KIAA0319/SLC6A4/TNR/OLFM1/FSTL4/GHRL/BCL11A/MUSK/SYT4/MAPT/SEMA3E/UNC13A/NKX6-1/DSCAM/CXCL12/RIMS2/NPY1R/RIMS1/LPAR3/IGF1/ARX                                                | 31    |

**Supplementary Table S1** (Continued)

| Ontology | ID         | Description                                      | GeneRatio | BgRatio    | p-Value  | p.adjust | q-Value  | geneID                                                                                                                                                                                                                  | Count |
|----------|------------|--------------------------------------------------|-----------|------------|----------|----------|----------|-------------------------------------------------------------------------------------------------------------------------------------------------------------------------------------------------------------------------|-------|
| BP       | GO:0031279 | Regulation of cyclase activity                   | 12/917    | 78/18,800  | 0.000375 | 0.007454 | 0.006409 | <i>GUCA1C/VIPR2/NOS1/ADGRV1/GALR1/TSHR/ADCYAP1/P2RY13/CCR2/GLP1R/GUCA2A/GPR87</i>                                                                                                                                       | 12    |
| BP       | GO:0042136 | Neurotransmitter biosynthetic process            | 5/917     | 14/18,800  | 0.000378 | 0.007475 | 0.006427 | <i>NOS1/SLC5A7/PAH/CHAT/GAD2</i>                                                                                                                                                                                        | 5     |
| BP       | GO:0098661 | Inorganic anion transmembrane transport          | 13/917    | 90/18,800  | 0.000409 | 0.008064 | 0.006933 | <i>GABRB3/ANO5/ANO3/SLC26A4/SLC17A1/GLRA3/GABRA4/CASR/GABRG2/CFTR/GLRA1/GABRA2/SLC26A9</i>                                                                                                                              | 13    |
| BP       | GO:0007617 | Mating behavior                                  | 8/917     | 38/18,800  | 0.000412 | 0.008072 | 0.00694  | <i>P2RX1/MTNR1A/VIP/ABAT/TACR1/SLC6A4/MAPK8IP2/CNR1</i>                                                                                                                                                                 | 8     |
| BP       | GO:0030900 | Forebrain development                            | 34/917    | 376/18,800 | 0.000415 | 0.008107 | 0.00697  | <i>SLC1A2/ERBB4/CCDC141/NTRK2/PROX1/BNIP3/RTN4RL1/RELN/P2RY12/SLC8A1/TNR/FOXP2/CHRN2/SLC4A10/GDF7/LRRK2/CNTN2/PCSK1/NEUROD1/APLP1/ELAVL4/EOMES/SSTR2/CXCL12/FEZF1/SSTR3/ASCL1/PITX1/EPHA5/FGF10/NPY/CDK5R2/ARX/PAX5</i> | 34    |
| BP       | GO:0071695 | Anatomical structure maturation                  | 25/917    | 246/18,800 | 0.000434 | 0.008447 | 0.007262 | <i>BHLHA15/NRCAM/CX3CR1/ZBTB16/EPO/ADGRB3/PDE3A/RET/BCL11A/LRRK2/NKX6-1/CNTN2/SPINK1/MYOC/ASCL1/CFTR/IGF1/ACTL6B/TDRD1/CCL21/CDK5R2/FEV/PAEP/FGG/CCL19</i>                                                              | 25    |
| BP       | GO:0006941 | Striated muscle contraction                      | 20/917    | 178/18,800 | 0.000443 | 0.008582 | 0.007378 | <i>MYH7/KCNJ5/DTNA/MYLK2/NOS1/FGF12/MYH6/SLC8A3/DMD/CACNB2/SLC8A1/SCN4A/KCND3/ANK2/SCN3B/KLHL41/KCNA5/KCNJ3/HCN4/CHGA</i>                                                                                               | 20    |
| BP       | GO:0030195 | Negative regulation of blood coagulation         | 9/917     | 48/18,800  | 0.000453 | 0.008728 | 0.007504 | <i>F11/ABAT/KLKB1/VTN/APOH/FGA/FGB/KRT1/FGG</i>                                                                                                                                                                         | 9     |
| BP       | GO:0051963 | Regulation of synapse assembly                   | 14/917    | 103/18,800 | 0.000471 | 0.009046 | 0.007777 | <i>NTRK2/AMIGO1/NLGN1/ADGRB3/FLRT2/NRXN1/LRRTM2/CHRN2/GHRL/SLITRK1/MUSK/CBLN1/LHFPL4/LRRTM3</i>                                                                                                                         | 14    |
| BP       | GO:0007411 | Axon guidance                                    | 24/917    | 234/18,800 | 0.000491 | 0.009387 | 0.008071 | <i>NRCAM/RELN/SEMA6D/NFASC/DSCAML1/NCAM1/FLRT2/NRXN1/TNR/RET/GDF7/SEMA3E/CNTN2/KIF5C/DSCAM/DPYSL5/CXCL12/GFRA3/FEZF1/EPHA5/CDK5R2/CNTN5/ARX/UNC5D</i>                                                                   | 24    |
| BP       | GO:0002691 | Regulation of cellular extravasation             | 8/917     | 39/18,800  | 0.000496 | 0.009407 | 0.008088 | <i>PDGFD/SELP/CCR2/ITGA4/SELE/CXCL12/CCL21/FUT9</i>                                                                                                                                                                     | 8     |
| BP       | GO:0090278 | Negative regulation of peptide hormone secretion | 8/917     | 39/18,800  | 0.000496 | 0.009407 | 0.008088 | <i>CARTPT/KCNB1/GHRL/CRHBP/SFRP1/KCNJ11/ABCC8/CHGA</i>                                                                                                                                                                  | 8     |
| BP       | GO:0007620 | Copulation                                       | 6/917     | 22/18,800  | 0.000504 | 0.009521 | 0.008186 | <i>P2RX1/VIP/ABAT/TACR1/SLC6A4/CNR1</i>                                                                                                                                                                                 | 6     |

(Continued)



Supplementary Table S1 (Continued)

| Ontology | ID         | Description                                                                       | GeneRatio | BgRatio    | p-Value  | p.adjust | q-Value  | geneID                                                                                                                                                                                                 | Count |
|----------|------------|-----------------------------------------------------------------------------------|-----------|------------|----------|----------|----------|--------------------------------------------------------------------------------------------------------------------------------------------------------------------------------------------------------|-------|
| BP       | GO:0097485 | Neuron projection guidance                                                        | 24/917    | 235/18,800 | 0.000522 | 0.009819 | 0.008442 | <i>NRCAM/RELN/SEMA6D/NFASC/DSCAML1/NCAM1/FLRT2/NRXN1/TNR/RET/GDF7/SEMA3E/CNTN2/KIF5C/DSCAM/DPYSL5/CXCL12/GFRA3/FEZF1/EPHA5/CDK5R2/CNTN5/ARX/UNC5D</i>                                                  | 24    |
| BP       | GO:0097553 | Calcium ion transmembrane import into cytosol                                     | 18/917    | 154/18,800 | 0.000524 | 0.009819 | 0.008442 | <i>P2RX1/NOS1/AKAP6/SLC8A3/SLC8A2/DMD/SLC8A1/FASLG/ANK2/MCOLN3/CACNA1B/CCR5/PTPRC/TRPV6/XCR1/CCL21/CXCL9/CCL19</i>                                                                                     | 18    |
| BP       | GO:1900047 | Negative regulation of hemostasis                                                 | 9/917     | 49/18,800  | 0.000531 | 0.009905 | 0.008516 | <i>F11/ABAT/KLKB1/VTN/APOH/FGA/FGB/KRT1/FGG</i>                                                                                                                                                        | 9     |
| BP       | GO:0051966 | Regulation of synaptic transmission, glutamatergic                                | 11/917    | 70/18,800  | 0.000541 | 0.009996 | 0.008594 | <i>NLGN1/RELN/NRXN1/TNR/UNC13A/CCR2/LRRK2/MAPK8IP2/CACNG5/CNR1/GRM4</i>                                                                                                                                | 11    |
| BP       | GO:0036376 | Sodium ion export across plasma membrane                                          | 5/917     | 15/18,800  | 0.000544 | 0.009996 | 0.008594 | <i>FXYD2/SLC8A1/SLC4A4/ATP1A3/ATP4A</i>                                                                                                                                                                | 5     |
| BP       | GO:0048172 | Regulation of short-term neuronal synaptic plasticity                             | 5/917     | 15/18,800  | 0.000544 | 0.009996 | 0.008594 | <i>SLC8A2/SLC4A10/SYT4/SHISA9/SYP</i>                                                                                                                                                                  | 5     |
| BP       | GO:0099509 | Regulation of presynaptic cytosolic calcium ion concentration                     | 5/917     | 15/18,800  | 0.000544 | 0.009996 | 0.008594 | <i>P2RX1/CACNB2/ATP2B2/SCGN/CNR1</i>                                                                                                                                                                   | 5     |
| BP       | GO:0046942 | Carboxylic acid transport                                                         | 27/917    | 279/18,800 | 0.000565 | 0.010322 | 0.008874 | <i>SLC1A2/PLA2G1B/NTRK2/SLC16A12/SLC7A2/CD36/ABAT/SLC38A3/SLCO1C1/SLC26A4/NPY5R/CLTRN/SLC17A4/SYT4/SLC6A15/SLC17A1/SLC22A9/SLC3A1/NROB2/AVPR1B/SLC5A8/SLC10A2/CASR/CYP4A11/SLC6A17/PLA2G2D/SLC26A9</i> | 27    |
| BP       | GO:0007189 | Adenylate cyclase-activating G protein-coupled receptor signaling pathway         | 18/917    | 155/18,800 | 0.000567 | 0.010322 | 0.008874 | <i>GPHA2/VIP/ADCY1/ADGRB3/PTGFR/GALR1/TSHR/ADCYAP1/ADGRG2/APLP1/CNR1/GPR119/LPAR3/GLP1R/CHGA/CXCL9/UCN3/IAPP</i>                                                                                       | 18    |
| BP       | GO:0002792 | Negative regulation of peptide secretion                                          | 8/917     | 40/18,800  | 0.000594 | 0.010776 | 0.009265 | <i>CARTPT/KCNB1/GHRL/CRHBP/SFRP1/KCNJ11/ABCC8/CHGA</i>                                                                                                                                                 | 8     |
| BP       | GO:0019933 | Camp-mediated signaling                                                           | 9/917     | 50/18,800  | 0.00062  | 0.011116 | 0.009557 | <i>PEX5L/AKAP6/ADCY1/PDE3A/PDE3B/ADCYAP1/GLP1R/EPHA5/SCTR</i>                                                                                                                                          | 9     |
| BP       | GO:0048168 | Regulation of neuronal synaptic plasticity                                        | 9/917     | 50/18,800  | 0.00062  | 0.011116 | 0.009557 | <i>SLC8A2/NEURL1/KIT/SLC4A10/SYT4/CNTN2/SHISA9/SYP/CAMK2B</i>                                                                                                                                          | 9     |
| BP       | GO:0061178 | Regulation of insulin secretion involved in cellular response to glucose stimulus | 9/917     | 50/18,800  | 0.00062  | 0.011116 | 0.009557 | <i>BRSK2/GPLD1/GHRL/GPR27/RFX6/ZBED6/EPHA5/CFTR/NR1H4</i>                                                                                                                                              | 9     |

**Supplementary Table S1** (Continued)

| Ontology | ID         | Description                                                                 | GeneRatio | BgRatio    | p-Value  | p.adjust | q-Value  | geneID                                                                                                                                                                                                     | Count |
|----------|------------|-----------------------------------------------------------------------------|-----------|------------|----------|----------|----------|------------------------------------------------------------------------------------------------------------------------------------------------------------------------------------------------------------|-------|
| BP       | GO:0007612 | Learning                                                                    | 17/917    | 145/18,800 | 0.000715 | 0.012772 | 0.010981 | PRKAR2B/NTRK2/PAK5/RELN/ADGRB3/SLC8A3/SLC8A2/TACR1/NRXN1/TNR/KIT/CHRN2/CNTN2/MAPK8IP2/ELAVL4/SNAP25/ABCC8                                                                                                  | 17    |
| BP       | GO:0007157 | Heterophilic cell-cell adhesion via plasma membrane cell adhesion molecules | 9/917     | 51/18,800  | 0.00072  | 0.012824 | 0.011025 | UMOD/AMIGO1/NLGN1/REG3A/SELP/CBLN1/SELE/CADM3/NECTIN4                                                                                                                                                      | 9     |
| BP       | GO:0035883 | Enteroendocrine cell differentiation                                        | 7/917     | 32/18,800  | 0.00074  | 0.013117 | 0.011277 | NKX6-1/NEUROD1/INSM1/RFX6/ZBED6/NKX2-2/BMP5                                                                                                                                                                | 7     |
| BP       | GO:1990138 | Neuron projection extension                                                 | 19/917    | 172/18,800 | 0.000751 | 0.013268 | 0.011407 | NRCAM/MAP2/SEMA6D/KIAA0319/TNR/OLFM1/BCL11A/SYT4/MAPT/SEMA3E/UNC13A/SPAG6/NKX6-1/DSCAM/ITGA4/CXCL12/RIMS2/RIMS1/SH3GL2                                                                                     | 19    |
| BP       | GO:0061041 | Regulation of wound healing                                                 | 16/917    | 133/18,800 | 0.000765 | 0.013448 | 0.011562 | F11/REG3G/CD36/ABAT/MMRN1/REG3A/KLKB1/VTN/AJAP1/APOH/ABCC8/FGA/FGB/KRT1/APCS/FGG                                                                                                                           | 16    |
| BP       | GO:0070588 | Calcium ion transmembrane transport                                         | 29/917    | 314/18,800 | 0.000767 | 0.013448 | 0.011562 | BHLHA15/P2RX1/NOS1/AKAP6/TRPM6/RGN/SLC8A3/SLC8A2/DMD/CACNB2/SLC8A1/FASLG/ATP2B2/ANK2/MCOLN3/CACNA2D2/TRPM3/CACNA1B/CACNG5/CCR5/PTPRC/GPM6A/TRPV6/XCR1/CCL21/MRLN/CXCL9/PLP1/CCL19                          | 29    |
| BP       | GO:0036465 | Synaptic vesicle recycling                                                  | 11/917    | 73/18,800  | 0.000779 | 0.013554 | 0.011654 | CEL/NLGN1/DNAJC6/SH3GL3/PACIN1/LRRK2/SYP/SNAP91/SH3GL2/SYT5/SYT8                                                                                                                                           | 11    |
| BP       | GO:0140029 | Exocytic process                                                            | 11/917    | 73/18,800  | 0.000779 | 0.013554 | 0.011654 | P2RX1/NLGN1/RAB3C/KCNB1/GRIK5/UNC13A/SYT9/SNAP25/CPLX2/CFTR/TRARG1                                                                                                                                         | 11    |
| BP       | GO:0014074 | Response to purine-containing compound                                      | 16/917    | 134/18,800 | 0.000831 | 0.014335 | 0.012325 | AQP8/P2RX1/AKAP6/CDO1/P2RY12/PDE3A/SLC6A4/SLC8A1/CRHBP/ABCC9/KCNJ11/CNGA3/HCN4/CFTR/ADIPOQ/PCK1                                                                                                            | 16    |
| BP       | GO:0006869 | Lipid transport                                                             | 34/917    | 391/18,800 | 0.000831 | 0.014335 | 0.012325 | SPX/PLA2G1B/CEL/PNLIP/ABCB1/ABCA3/CLU/CD36/XKR4/LPA/ABCD2/TTPA/ANO3/FASLG/SLCO1C1/GALR1/GHRL/APOH/ABCA8/SLC22A9/NROB2/AVPR1B/XKR7/SLC5A8/SLC10A2/RBP2/CYP4A11/CFTR/ADIPOQ/PMP2/FABP4/MTTP/PLA2G2D/SERPINA5 | 34    |
| BP       | GO:0050819 | Negative regulation of coagulation                                          | 9/917     | 52/18,800  | 0.000834 | 0.014335 | 0.012325 | F11/ABAT/KLKB1/VTN/APOH/FGA/FGB/KRT1/FGG                                                                                                                                                                   | 9     |
| BP       | GO:0007274 | Neuromuscular synaptic transmission                                         | 6/917     | 24/18,800  | 0.000836 | 0.014335 | 0.012325 | DTNA/MYLK2/SLC5A7/CHRN2/CHAT/RIMBP2                                                                                                                                                                        | 6     |

(Continued)

Supplementary Table S1 (Continued)

| Ontology | ID         | Description                                             | GeneRatio | BgRatio    | p-Value  | p.adjust | q-Value  | geneID                                                                                                                                                                                                               | Count |
|----------|------------|---------------------------------------------------------|-----------|------------|----------|----------|----------|----------------------------------------------------------------------------------------------------------------------------------------------------------------------------------------------------------------------|-------|
| BP       | GO:0016485 | Protein processing                                      | 24/917    | 243/18,800 | 0.000841 | 0.014362 | 0.012347 | CUZD1/MBOAT4/F11/CMA1/KLKB1/TLL1/KLK1/CTSG/APOH/LRRK2/CNTN2/HPN/PCSK1/CPE/PCSK2/SCG5/FGA/KLK13/PRSS3/FGB/SLC30A8/TMPRSS4/KLK2/FGG                                                                                    | 24    |
| BP       | GO:0007613 | Memory                                                  | 15/917    | 122/18,800 | 0.000881 | 0.014985 | 0.012883 | CX3CR1/PAK5/RELN/ADCY1/SLC8A3/SLC8A2/TACR1/SLC6A4/CHRN2/MUSK/SYT4/MAPT/CNR1/ABCC8/KLK8                                                                                                                               | 15    |
| BP       | GO:0045907 | Positive regulation of vasoconstriction                 | 7/917     | 33/18,800  | 0.0009   | 0.015198 | 0.013067 | TACR1/CYSLTR1/AVPR1B/CASR/FGA/FGB/FGG                                                                                                                                                                                | 7     |
| BP       | GO:1902656 | Calcium ion import into cytosol                         | 7/917     | 33/18,800  | 0.0009   | 0.015198 | 0.013067 | P2RX1/SLC8A3/SLC8A2/SLC8A1/CACNA1B/TRPV6/MS4A1                                                                                                                                                                       | 7     |
| BP       | GO:0046928 | Regulation of neurotransmitter secretion                | 12/917    | 86/18,800  | 0.000925 | 0.015571 | 0.013388 | CHRN3/P2RX1/NLGN1/ADCY1/CACNB2/SYT4/LRRK2/SYP/CNR1/RIMS1/PRKCB/CPLX2                                                                                                                                                 | 12    |
| BP       | GO:0050773 | Regulation of dendrite development                      | 13/917    | 98/18,800  | 0.000936 | 0.015695 | 0.013494 | PAK3/RELN/KIAA0319/ADGRB3/PACSIN1/CHRN2/BCL11A/ELAVL4/CSMD3/ITPKA/SEZ6/CAMK2B/BMP5                                                                                                                                   | 13    |
| BP       | GO:0010043 | Response to zinc ion                                    | 9/917     | 53/18,800  | 0.000962 | 0.016028 | 0.01378  | KCNK3/MT1F/SLC30A2/MT1G/OTC/MT1H/ABCC8/GLRA1/SLC30A8                                                                                                                                                                 | 9     |
| BP       | GO:1901605 | Alpha-amino acid metabolic process                      | 21/917    | 203/18,800 | 0.000963 | 0.016028 | 0.01378  | GNMT/GLS2/TDH/NOS1/CDO1/HOGA1/PAH/HPD/NAT8L/PSAT1/ASPA/DPEP1/HMGCLL1/MAT1A/PRODH2/ART4/OTC/CBS/GAD2/ATCAY/NR1H4                                                                                                      | 21    |
| BP       | GO:0009410 | Response to xenobiotic stimulus                         | 35/917    | 411/18,800 | 0.001015 | 0.016787 | 0.014433 | AOX1/SLC1A2/KCNK3/ACACB/SCNN1B/ABCB1/ABCA3/GSTA2/GPLD1/NOS1/ABAT/VAV3/ADCY1/PDE3A/SLC6A4/SLC8A1/SULT1C4/RET/PPM1E/CRHBP/SFRP1/DPEP1/NKX6-1/KCNJ11/PCSK1/UGT2B15/NEUROD1/UGT2B11/CYP2C8/OTC/ABCC8/GAD2/ADIPOQ/CA9/SST | 35    |
| BP       | GO:0099173 | Postsynapse organization                                | 18/917    | 163/18,800 | 0.001026 | 0.016787 | 0.014433 | NRCAM/CEL/CTNND2/NLGN1/PAK3/RELN/KIF1A/CNKSR2/NRXN1/LRRTM2/GHRL/MUSK/LRRK2/INA/CBLN1/ITPKA/CAMK2B/LHFPL4                                                                                                             | 18    |
| BP       | GO:0019233 | Sensory perception of pain                              | 13/917    | 99/18,800  | 0.00103  | 0.016787 | 0.014433 | SPX/MMP24/KCNA2/VIP/TACR1/PHF24/CHRN2/CCR2/SCN3B/CXCL12/CNR1/NPY1R/IAPP                                                                                                                                              | 13    |
| BP       | GO:0051588 | Regulation of neurotransmitter transport                | 13/917    | 99/18,800  | 0.00103  | 0.016787 | 0.014433 | CHRN3/P2RX1/NLGN1/NOS1/ADCY1/CACNB2/SYT4/LRRK2/SYP/CNR1/RIMS1/PRKCB/CPLX2                                                                                                                                            | 13    |
| BP       | GO:0045956 | Positive regulation of calcium ion-dependent exocytosis | 5/917     | 17/18,800  | 0.001034 | 0.016787 | 0.014433 | KCNB1/SCAMP5/SYT4/SYT9/CDK5R2                                                                                                                                                                                        | 5     |

**Supplementary Table S1** (Continued)

| Ontology | ID         | Description                                        | GeneRatio | BgRatio    | p-Value  | p.adjust | q-Value  | geneID                                                                                                                                                                     | Count |
|----------|------------|----------------------------------------------------|-----------|------------|----------|----------|----------|----------------------------------------------------------------------------------------------------------------------------------------------------------------------------|-------|
| BP       | GO:0051969 | Regulation of transmission of nerve impulse        | 5/917     | 17/18,800  | 0.001034 | 0.016787 | 0.014433 | <i>FGF12/CARTPT/TNR/GHRL/GLRA1</i>                                                                                                                                         | 5     |
| BP       | GO:0072376 | Protein activation cascade                         | 5/917     | 17/18,800  | 0.001034 | 0.016787 | 0.014433 | <i>KLKB1/APOH/FGA/FGB/FGG</i>                                                                                                                                              | 5     |
| BP       | GO:0021537 | Telencephalon development                          | 24/917    | 247/18,800 | 0.001056 | 0.017027 | 0.014639 | <i>SLC1A2/ERBB4/CCDC141/NTRK2/PROX1/BNIP3/RTN4RL1/RELN/P2RY12/SLC8A1/TNR/FOXP2/LRRK2/CNTN2/NEUROD1/EOMES/CXCL12/FEZF1/ASCL1/EPHA5/NPY/CDK5R2/ARX/PAX5</i>                  | 24    |
| BP       | GO:0098656 | Anion transmembrane transport                      | 24/917    | 247/18,800 | 0.001056 | 0.017027 | 0.014639 | <i>SLC1A2/ABCB1/SLC16A12/SLC7A2/GABRB3/ANO5/ANO3/SLC38A3/SLC26A4/SLC4A4/CLTRN/SLC4A10/SLC17A1/GLRA3/SLC22A9/SLC3A1/SLC5A8/GABRA4/CASR/GABRG2/CFTR/GLRA1/GABRA2/SLC26A9</i> | 24    |
| BP       | GO:0071248 | Cellular response to metal ion                     | 20/917    | 191/18,800 | 0.001083 | 0.017331 | 0.014901 | <i>KCNK3/MT1F/SYT6/NLGN1/GPLD1/BNIP3/ADGRV1/ADCY1/MT1G/DLG2/SYT4/CRHBP/DPEP1/LRRK2/SYT9/MT1H/SYT5/GLRA1/FABP4/SYT8</i>                                                     | 20    |
| BP       | GO:0035590 | Purinergic nucleotide receptor signaling pathway   | 7/917     | 34/18,800  | 0.001086 | 0.017331 | 0.014901 | <i>P2RX1/P2RY12/CTSG/P2RY13/GPR34/CNTN2/GPR87</i>                                                                                                                          | 7     |
| BP       | GO:0086019 | Cell-cell signaling involved in cardiac conduction | 7/917     | 34/18,800  | 0.001086 | 0.017331 | 0.014901 | <i>KCNJ5/CACNB2/ANK2/SCN3B/KCNA5/KCNJ3/HCN4</i>                                                                                                                            | 7     |
| BP       | GO:0002067 | Glandular epithelial cell differentiation          | 9/917     | 54/18,800  | 0.001105 | 0.017577 | 0.015112 | <i>PROX1/NKX6-1/NEUROD1/INSM1/RFX6/ZBED6/ASCL1/NKX2-2/BMP5</i>                                                                                                             | 9     |
| BP       | GO:0060560 | Developmental growth involved in morphogenesis     | 23/917    | 234/18,800 | 0.001139 | 0.018029 | 0.015501 | <i>NRCAM/MAP2/SEMA6D/KIAA0319/TNR/OLFM1/FSTL4/BCL11A/SYT4/MAPT/SFRP1/SEMA3E/UNC13A/SPAG6/NKX6-1/DSCAM/ITGA4/CXCL12/RIMS2/RIMS1/SH3GL2/LPAR3/FGF10</i>                      | 23    |
| BP       | GO:0060048 | Cardiac muscle contraction                         | 16/917    | 138/18,800 | 0.001141 | 0.018029 | 0.015501 | <i>MYH7/KCNJ5/MYLK2/NOS1/FGF12/MYH6/DMD/CACNB2/SLC8A1/KCND3/ANK2/SCN3B/KCNA5/KCNJ3/HCN4/CHGA</i>                                                                           | 16    |
| BP       | GO:0019098 | Reproductive behavior                              | 8/917     | 44/18,800  | 0.001152 | 0.018132 | 0.015589 | <i>P2RX1/MTNR1A/VIP/ABAT/TACR1/SLC6A4/MAPK8IP2/CNR1</i>                                                                                                                    | 8     |
| BP       | GO:0002526 | Acute inflammatory response                        | 14/917    | 113/18,800 | 0.001198 | 0.018743 | 0.016114 | <i>REG3G/KL/EPO/TACR1/REG3A/KLKB1/NPY5R/C2CD4B/DNASE1L3/CNR1/NPY/PLA2G2D/APCS/CRP</i>                                                                                      | 14    |

(Continued)

Supplementary Table S1 (Continued)

| Ontology | ID         | Description                                              | GeneRatio | BgRatio    | p-Value  | p.adjust | q-Value  | geneID                                                                                                                                                                                              | Count |
|----------|------------|----------------------------------------------------------|-----------|------------|----------|----------|----------|-----------------------------------------------------------------------------------------------------------------------------------------------------------------------------------------------------|-------|
| BP       | GO:0050900 | Leukocyte migration                                      | 33/917    | 384/18,800 | 0.001199 | 0.018743 | 0.016114 | C5/PLA2G1B/UMOD/PDGFD/GP2/CX3CR1/VAV3/TACR1/P2RY12/SELP/RET/KIT/CTSG/CCR2/CCL14/ITGA4/VEGFD/MADCAM1/SELE/CCR5/CXCL12/GPR18/SCG2/THBS4/GPR15/CHGA/BMP5/CCL21/CXCR5/CXCL9/S100A14/FUT9/CCL19          | 33    |
| BP       | GO:0086001 | Cardiac muscle cell action potential                     | 11/917    | 77/18,800  | 0.001226 | 0.019102 | 0.016423 | KCNJ5/FGF12/DMD/CACNB2/SLC8A1/KCND3/ANK2/SCN3B/KCNA5/KCNJ3/HCN4                                                                                                                                     | 11    |
| BP       | GO:0048813 | Dendrite morphogenesis                                   | 16/917    | 139/18,800 | 0.001233 | 0.019148 | 0.016462 | CTNND2/NLGN1/PAK3/MAP2/RELN/KIF1A/ADGRB3/CHRN2/DCDC2/LRRK2/MAPK8IP2/DSCAM/ELAVL4/CTNNA2/ITPKA/CAMK2B                                                                                                | 16    |
| BP       | GO:0090257 | Regulation of muscle system process                      | 24/917    | 250/18,800 | 0.001247 | 0.019299 | 0.016592 | SPX/MYH7/P2RX1/MYLK2/NOS1/AKAP6/ABAT/CHRM3/SLC8A3/TACR1/DMD/SLC8A1/SCN4A/KIT/GHRL/ANK2/SSTR2/CHRM2/HCN4/KCNB2/ABCC8/IGF1/CAMK2B/CHGA                                                                | 24    |
| BP       | GO:0070098 | Chemokine-mediated signaling pathway                     | 12/917    | 89/18,800  | 0.001257 | 0.019394 | 0.016674 | CX3CR1/CCR2/CCL14/CXCR6/CCR5/CXCL12/ACKR1/XCR1/CCL21/CXCR5/CXCL9/CCL19                                                                                                                              | 12    |
| BP       | GO:0060998 | Regulation of dendritic spine development                | 9/917     | 55/18,800  | 0.001265 | 0.019453 | 0.016725 | NLGN1/PAK3/RELN/KIF1A/SDK1/NEURL1/FSTL4/ITPKA/CAMK2B                                                                                                                                                | 9     |
| BP       | GO:0030193 | Regulation of blood coagulation                          | 10/917    | 66/18,800  | 0.001278 | 0.019581 | 0.016835 | F11/CD36/ABAT/KLKB1/VTN/APOH/FGA/FGB/KRT1/FGG                                                                                                                                                       | 10    |
| BP       | GO:0019228 | Neuronal action potential                                | 7/917     | 35/18,800  | 0.001301 | 0.019873 | 0.017086 | P2RX1/KCNA2/FGF12/SCN3A/SCN4A/SCN7A/KCNMB2                                                                                                                                                          | 7     |
| BP       | GO:0010959 | Regulation of metal ion transport                        | 34/917    | 403/18,800 | 0.001392 | 0.020961 | 0.018021 | PLA2G1B/P2RX1/AMIGO1/KCNAB1/NOS1/AKAP6/FGF12/WNK2/RGN/VIP/DPP10/EPO/FXYD2/DMD/CACNB2/HOMER2/SLC8A1/EGF/ANK2/SCN3B/SPINK1/MIR210/DPP6/KCNA5/CXCL12/CASR/ABCC8/GCK/CAMK2B/PLPP4/MRLN/CXCL9/PLP1/FFAR1 | 34    |
| BP       | GO:0050770 | Regulation of axonogenesis                               | 17/917    | 154/18,800 | 0.001404 | 0.020961 | 0.018021 | BRSK2/NTRK2/AMIGO1/PAK3/MAP2/SEMA6D/KIAA0319/TNR/RET/FSTL4/SLITRK1/MAPT/SEMA3E/CNTN2/DSCAM/CXCL12/LPAR3                                                                                             | 17    |
| BP       | GO:0051610 | Serotonin uptake                                         | 4/917     | 11/18,800  | 0.001409 | 0.020961 | 0.018021 | NOS1/SLC6A4/SLC29A4/SLC18A2                                                                                                                                                                         | 4     |
| BP       | GO:0086070 | SA node cell to atrial cardiac muscle cell communication | 4/917     | 11/18,800  | 0.001409 | 0.020961 | 0.018021 | ANK2/SCN3B/KCNA5/HCN4                                                                                                                                                                               | 4     |
| BP       | GO:0097048 | Dendritic cell apoptotic process                         | 4/917     | 11/18,800  | 0.001409 | 0.020961 | 0.018021 | CXCL12/CCL21/BLK/CCL19                                                                                                                                                                              | 4     |
| BP       | GO:0099171 | Presynaptic modulation of chemical synaptic transmission | 4/917     | 11/18,800  | 0.001409 | 0.020961 | 0.018021 | CACNB2/SYT4/CNR1/PRKCB                                                                                                                                                                              | 4     |

**Supplementary Table S1** (Continued)

| Ontology | ID         | Description                                                                                | GeneRatio | BgRatio    | p-Value  | p.adjust | q-Value  | geneID                                                                                                                                                                                                                                           | Count |
|----------|------------|--------------------------------------------------------------------------------------------|-----------|------------|----------|----------|----------|--------------------------------------------------------------------------------------------------------------------------------------------------------------------------------------------------------------------------------------------------|-------|
| BP       | GO:1903238 | Positive regulation of leukocyte tethering or rolling                                      | 4/917     | 11/18,800  | 0.001409 | 0.020961 | 0.018021 | <i>SELP/CCR2/ITGA4/SELE</i>                                                                                                                                                                                                                      | 4     |
| BP       | GO:2000668 | Regulation of dendritic cell apoptotic process                                             | 4/917     | 11/18,800  | 0.001409 | 0.020961 | 0.018021 | <i>CXCL12/CCL21/BLK/CCL19</i>                                                                                                                                                                                                                    | 4     |
| BP       | GO:0046395 | Carboxylic acid catabolic process                                                          | 23/917    | 238/18,800 | 0.001428 | 0.02114  | 0.018175 | <i>GLS2/TDH/CEL/ACACB/NOS1/ABAT/CDO1/ACADL/HOGA1/ABCD2/PAH/HPD/ASPA/HMGCLL1/MAT1A/PRODH2/OTC/CNR1/CBS/GAD2/CYP4A11/ADIPOQ/PCK1</i>                                                                                                               | 23    |
| BP       | GO:0035418 | Protein localization to synapse                                                            | 10/917    | 67/18,800  | 0.001438 | 0.02114  | 0.018175 | <i>NPHS1/NLGN1/RELN/BSN/NRXN1/PCLO/DLG2/MAPT/KIF5C/SNAP25</i>                                                                                                                                                                                    | 10    |
| BP       | GO:0043113 | Receptor clustering                                                                        | 9/917     | 56/18,800  | 0.001443 | 0.02114  | 0.018175 | <i>NLGN1/RELN/NRXN1/DLG2/GRIK5/MUSK/ITGA4/MADCAM1/LHFPL4</i>                                                                                                                                                                                     | 9     |
| BP       | GO:0055078 | Sodium ion homeostasis                                                                     | 9/917     | 56/18,800  | 0.001443 | 0.02114  | 0.018175 | <i>SPX/SCNN1B/TACR1/SLC8A1/SCNN1G/SCN7A/ATP1A3/ATP4A/CYP4A11</i>                                                                                                                                                                                 | 9     |
| BP       | GO:0061756 | Leukocyte adhesion to vascular endothelial cell                                            | 9/917     | 56/18,800  | 0.001443 | 0.02114  | 0.018175 | <i>CX3CR1/SELP/CCR2/ITGA4/MADCAM1/SELE/CXCL12/CCL21/FUT9</i>                                                                                                                                                                                     | 9     |
| BP       | GO:0060284 | Regulation of cell development                                                             | 40/917    | 500/18,800 | 0.001518 | 0.022157 | 0.019049 | <i>NTRK2/AMIGO1/CX3CR1/PAK3/MAP2/RELN/SEMA6D/KIAA0319/TTPA/PDE3A/TNR/RET/NEURL1/KIT/FSTL4/SLITRK1/BCL11A/ASPA/SYT4/MAPT/SEMA3E/LRRK2/NKX6-1/SOX11/DSCAM/CXCL12/LPAR3/MYOC/FEZF1/ITPKA/ABCC8/ASCL1/FGA/NKX2-2/IGF1/ADIPOQ/CAMK2B/FGF/PAEP/FGG</i> | 40    |
| BP       | GO:0031018 | Endocrine pancreas development                                                             | 8/917     | 46/18,800  | 0.001556 | 0.022647 | 0.019471 | <i>NKX6-1/NEUROD1/INSM1/ONECUT1/RFX6/ZBED6/NKX2-2/BMP5</i>                                                                                                                                                                                       | 8     |
| BP       | GO:1900046 | Regulation of hemostasis                                                                   | 10/917    | 68/18,800  | 0.001613 | 0.023402 | 0.02012  | <i>F11/CD36/ABAT/KLKB1/VTN/APOH/FGA/FGF/KRT1/FGG</i>                                                                                                                                                                                             | 10    |
| BP       | GO:0035774 | Positive regulation of insulin secretion involved in cellular response to glucose stimulus | 6/917     | 27/18,800  | 0.001623 | 0.023402 | 0.02012  | <i>GPLD1/GHRL/GPR27/RFX6/CFTR/NR1H4</i>                                                                                                                                                                                                          | 6     |
| BP       | GO:0051350 | Negative regulation of lyase activity                                                      | 6/917     | 27/18,800  | 0.001623 | 0.023402 | 0.02012  | <i>ADGRV1/GALR1/P2RY13/CCR2/MIR210/GPR87</i>                                                                                                                                                                                                     | 6     |
| BP       | GO:0098900 | Regulation of action potential                                                             | 9/917     | 57/18,800  | 0.001641 | 0.023589 | 0.020281 | <i>FGF12/CD36/SLC8A2/TACR1/KCNB1/CHRN2/ANK2/HCN4/CNR1</i>                                                                                                                                                                                        | 9     |

(Continued)

**Supplementary Table S1** (Continued)

| Ontology | ID         | Description                                       | GeneRatio | BgRatio    | p-Value  | p.adjust | q-Value  | geneID                                                                                                                                           | Count |
|----------|------------|---------------------------------------------------|-----------|------------|----------|----------|----------|--------------------------------------------------------------------------------------------------------------------------------------------------|-------|
| BP       | GO:0002065 | Columnar/cuboidal epithelial cell differentiation | 12/917    | 92/18,800  | 0.001682 | 0.024101 | 0.020721 | <i>PROX1/ENAM/NKX6-1/SOX11/NEUROD1/INSM1/RFX6/ZBED6/ASCL1/NKX2-2/NPY/BMP5</i>                                                                    | 12    |
| BP       | GO:0016054 | Organic acid catabolic process                    | 23/917    | 242/18,800 | 0.001777 | 0.025338 | 0.021785 | <i>GLS2/TDH/CEL/ACACB/NOS1/ABAT/CDO1/ACADL/HOGA1/ABCD2/PAH/HPD/ASPA/HMGCLL1/MAT1A/PRODH2/OTC/CNR1/CBS/GAD2/CYP4A11/ADIPOQ/PCK1</i>               | 23    |
| BP       | GO:1901890 | Positive regulation of cell junction assembly     | 13/917    | 105/18,800 | 0.001779 | 0.025338 | 0.021785 | <i>NTRK2/AMIGO1/NLGN1/ADGRB3/FLRT2/NRXN1/LRRTM2/GHRL/SLITRK1/SFRP1/CBLN1/MYOC/LRRTM3</i>                                                         | 13    |
| BP       | GO:0002673 | Regulation of acute inflammatory response         | 8/917     | 47/18,800  | 0.001797 | 0.025427 | 0.021861 | <i>KLKB1/NPY5R/C2CD4B/DNASE1L3/CNR1/NPY/PLA2G2D/APCS</i>                                                                                         | 8     |
| BP       | GO:0042220 | Response to cocaine                               | 8/917     | 47/18,800  | 0.001797 | 0.025427 | 0.021861 | <i>SLC1A2/ABAT/SDK1/HOMER2/CHRN2/CRHBP/ELAVL4/CNR1</i>                                                                                           | 8     |
| BP       | GO:0032094 | Response to food                                  | 7/917     | 37/18,800  | 0.00183  | 0.025824 | 0.022202 | <i>SPX/SCNN1B/CLPS/CARTPT/GHRL/NPY/CLPSL1</i>                                                                                                    | 7     |
| BP       | GO:0022029 | Telencephalon cell migration                      | 9/917     | 58/18,800  | 0.00186  | 0.026009 | 0.022362 | <i>CCDC141/RELN/P2RY12/TNR/LRRK2/CNTN2/CXCL12/CDK5R2/ARX</i>                                                                                     | 9     |
| BP       | GO:0045761 | Regulation of adenylate cyclase activity          | 9/917     | 58/18,800  | 0.00186  | 0.026009 | 0.022362 | <i>VIPR2/ADGRV1/GALR1/TSHR/ADCYAP1/P2RY13/CCR2/GLP1R/GPR87</i>                                                                                   | 9     |
| BP       | GO:0086065 | Cell communication involved in cardiac conduction | 9/917     | 58/18,800  | 0.00186  | 0.026009 | 0.022362 | <i>KCNJ5/CACNB2/SLC8A1/ANK2/SCN3B/ATP1A3/KCNA5/KCNJ3/HCN4</i>                                                                                    | 9     |
| BP       | GO:0007631 | Feeding behavior                                  | 13/917    | 106/18,800 | 0.00194  | 0.027039 | 0.023247 | <i>NTRK2/CARTPT/TACR1/NPY5R/GHRL/CNTN2/DACH1/PRLHR/CNR1/NPY1R/NPY/PPY/IAPP</i>                                                                   | 13    |
| BP       | GO:0051259 | Protein complex oligomerization                   | 23/917    | 244/18,800 | 0.001978 | 0.027134 | 0.023328 | <i>GNMT/SLC1A2/ACACB/ABCA3/KCNA2/TRPM6/KCTD16/KCNB1/AQP4/KCNA3/KCND3/KCNV1/PEG10/MAT1A/TRPM3/GLRA3/KCNA5/SCARA5/KCNB2/KCNG3/KCTD8/KRT1/MS4A1</i> | 23    |
| BP       | GO:0001835 | Blastocyst hatching                               | 6/917     | 28/18,800  | 0.001982 | 0.027134 | 0.023328 | <i>AKAP3/ARHGDI6/PPP4R4/ST8SIA6/ZBED6/PLPP4</i>                                                                                                  | 6     |
| BP       | GO:0035188 | Hatching                                          | 6/917     | 28/18,800  | 0.001982 | 0.027134 | 0.023328 | <i>AKAP3/ARHGDI6/PPP4R4/ST8SIA6/ZBED6/PLPP4</i>                                                                                                  | 6     |
| BP       | GO:0042133 | Neurotransmitter metabolic process                | 6/917     | 28/18,800  | 0.001982 | 0.027134 | 0.023328 | <i>NOS1/ABAT/SLC5A7/PAH/CHAT/GAD2</i>                                                                                                            | 6     |
| BP       | GO:0071684 | Organism emergence from protective structure      | 6/917     | 28/18,800  | 0.001982 | 0.027134 | 0.023328 | <i>AKAP3/ARHGDI6/PPP4R4/ST8SIA6/ZBED6/PLPP4</i>                                                                                                  | 6     |



**Supplementary Table S1** (Continued)

| Ontology | ID          | Description                                                 | GeneRatio | BgRatio    | p-Value  | p.adjust | q-Value  | geneID                                                                                                                    | Count |
|----------|-------------|-------------------------------------------------------------|-----------|------------|----------|----------|----------|---------------------------------------------------------------------------------------------------------------------------|-------|
| BP       | GO:0090330  | Regulation of platelet aggregation                          | 6/917     | 28/18,800  | 0.001982 | 0.027134 | 0.023328 | <i>CELA2A/ABAT/MMRN1/CTSG/BLK/FGG</i>                                                                                     | 6     |
| BP       | GO:0051260  | Protein homooligomerization                                 | 19/917    | 187/18,800 | 0.002024 | 0.027413 | 0.023569 | <i>GNMT/SLC1A2/ACACB/ABCA3/KCNA2/KCTD16/KCNB1/AQP4/KCNA3/KCND3/KCNV1/PEG10/MAT1A/GLRA3/KCNA5/SCARA5/KCNB2/KCNG3/KCTD8</i> | 19    |
| BP       | GO:0048709  | Oligodendrocyte differentiation                             | 12/917    | 94/18,800  | 0.002026 | 0.027413 | 0.023569 | <i>NTRK2/CLU/BNIP3/SOX6/SLC8A3/ASPA/NKX6-1/CNTN2/SOX11/ASCL1/NKX2-2/PLP1</i>                                              | 12    |
| BP       | GO:1905954  | Positive regulation of lipid localization                   | 12/917    | 94/18,800  | 0.002026 | 0.027413 | 0.023569 | <i>FITM1/ACACB/ABCA3/CD36/FASLG/GALR1/GHRL/AVPR1B/CYP4A11/ADIPOQ/VSTM2A/CIDEA</i>                                         | 12    |
| BP       | GO:0072148  | Epithelial cell fate commitment                             | 4/917     | 12/18,800  | 0.002032 | 0.027413 | 0.023569 | <i>PROX1/NEUROD1/NKX2-2/ARX</i>                                                                                           | 4     |
| BP       | GO:1901142  | Insulin metabolic process                                   | 4/917     | 12/18,800  | 0.002032 | 0.027413 | 0.023569 | <i>CELA2A/CPE/PCSK2/SLC30A8</i>                                                                                           | 4     |
| BP       | GO:0050805  | Negative regulation of synaptic transmission                | 10/917    | 71/18,800  | 0.002247 | 0.03014  | 0.025913 | <i>KCNB1/SLC6A4/TNR/NPY5R/CEL4/SYT4/MAPT/LRRK2/CBLN1/ADIPOQ</i>                                                           | 10    |
| BP       | GO:0050818  | Regulation of coagulation                                   | 10/917    | 71/18,800  | 0.002247 | 0.03014  | 0.025913 | <i>F11/CD36/ABAT/KLKB1/VTN/APOH/FGA/FGB/KRT1/FGG</i>                                                                      | 10    |
| BP       | GO:0019935  | Cyclic-nucleotide-mediated signaling                        | 11/917    | 83/18,800  | 0.002273 | 0.030405 | 0.026141 | <i>PEX5L/AKAP6/CD36/ADCY1/PDE3A/PDE3B/ADCYAP1/GLP1R/EPHA5/RUNDC3A/SCTR</i>                                                | 11    |
| BP       | GO:0061387  | Regulation of extent of cell growth                         | 13/917    | 108/18,800 | 0.002296 | 0.030625 | 0.02633  | <i>NRCAM/MAP2/SEMA6D/KIAA0319/TNR/OLFM1/FSTL4/MAPT/SEMA3E/NKX6-1/DSCAM/CXCL12/LPAR3</i>                                   | 13    |
| BP       | GO:1903793  | Positive regulation of anion transport                      | 8/917     | 49/18,800  | 0.002365 | 0.031402 | 0.026998 | <i>ABCB1/ABAT/SLC38A3/CLTRN/SYT4/AVPR1B/CYP4A11/CFTR</i>                                                                  | 8     |
| BP       | GO:00468,88 | Negative regulation of hormone secretion                    | 9/917     | 60/18,800  | 0.002368 | 0.031402 | 0.026998 | <i>CARTPT/KCNB1/GHRL/CRHBP/SFRP1/KCNJ11/ABCC8/ADIPOQ/CHGA</i>                                                             | 9     |
| BP       | GO:0003309  | Type B pancreatic cell differentiation                      | 6/917     | 29/18,800  | 0.002397 | 0.031425 | 0.027018 | <i>NKX6-1/INSM1/RFX6/ZBED6/NKX2-2/BMP5</i>                                                                                | 6     |
| BP       | GO:0007271  | Synaptic transmission, cholinergic                          | 6/917     | 29/18,800  | 0.002397 | 0.031425 | 0.027018 | <i>CHRN3/CHRM3/TACR1/RIC3/SLC5A7/CHRN2</i>                                                                                | 6     |
| BP       | GO:0015701  | Bicarbonate transport                                       | 6/917     | 29/18,800  | 0.002397 | 0.031425 | 0.027018 | <i>CA4/SLC26A4/SLC4A4/SLC4A10/CFTR/SLC26A9</i>                                                                            | 6     |
| BP       | GO:0051968  | Positive regulation of synaptic transmission, glutamatergic | 6/917     | 29/18,800  | 0.002397 | 0.031425 | 0.027018 | <i>NLGN1/RELN/NRXN1/TNR/CCR2/CACNG5</i>                                                                                   | 6     |

(Continued)

Supplementary Table S1 (Continued)

| Ontology | ID         | Description                                                   | GeneRatio | BgRatio    | p-Value  | p.adjust | q-Value  | geneID                                                                  | Count |
|----------|------------|---------------------------------------------------------------|-----------|------------|----------|----------|----------|-------------------------------------------------------------------------|-------|
| BP       | GO:0051899 | Membrane depolarization                                       | 11/917    | 84/18,800  | 0.002503 | 0.032632 | 0.028055 | SCN3A/CACNB2/SLC8A1/SCN4A/CHRN2/ANK2/LRRK2/SCN3B/SCN7A/HCN4/MYOC        | 11    |
| BP       | GO:0071277 | Cellular response to calcium ion                              | 11/917    | 84/18,800  | 0.002503 | 0.032632 | 0.028055 | SYT6/NLGN1/GPLD1/ADGRV1/ADCY1/SYT4/CRHBP/DPEP1/SYT9/SYT5/SYT8           | 11    |
| BP       | GO:1904994 | Regulation of leukocyte adhesion to vascular endothelial cell | 7/917     | 39/18,800  | 0.002513 | 0.032663 | 0.028082 | SELP/CCR2/ITGA4/SELE/CXCL12/CCL21/FUT9                                  | 7     |
| BP       | GO:1990868 | Response to chemokine                                         | 12/917    | 97/18,800  | 0.002648 | 0.034233 | 0.029432 | CX3CR1/CCR2/CCL14/CXCR6/CCR5/CXCL12/ACKR1/XCR1/CCL21/CXCR5/CXCL9/CCL19  | 12    |
| BP       | GO:1990869 | Cellular response to chemokine                                | 12/917    | 97/18,800  | 0.002648 | 0.034233 | 0.029432 | CX3CR1/CCR2/CCL14/CXCR6/CCR5/CXCL12/ACKR1/XCR1/CCL21/CXCR5/CXCL9/CCL19  | 12    |
| BP       | GO:0021885 | Forebrain cell migration                                      | 9/917     | 61/18,800  | 0.00266  | 0.034293 | 0.029483 | CCDC141/RELN/P2RY12/TNR/LRRK2/CNTN2/CXCL12/CDK5R2/ARX                   | 9     |
| BP       | GO:0099054 | Presynapse assembly                                           | 8/917     | 50/18,800  | 0.002697 | 0.034578 | 0.029728 | CEL/NLGN1/BSN/PCLO/SLITRK1/CBLN1/CNTN5/LRRTM3                           | 8     |
| BP       | GO:1903307 | Positive regulation of regulated secretory pathway            | 8/917     | 50/18,800  | 0.002697 | 0.034578 | 0.029728 | NLGN1/CACNB2/KCNB1/SCAMP5/SYT4/SYT9/CNR1/CDK5R2                         | 8     |
| BP       | GO:0043266 | Regulation of potassium ion transport                         | 13/917    | 110/18,800 | 0.002705 | 0.034579 | 0.02973  | AMIGO1/KCNAB1/NOS1/AKAP6/WNK2/VIP/DPP10/FXYD2/ANK2/DPP6/KCNA5/ABCC8/GCK | 13    |
| BP       | GO:0045123 | Cellular extravasation                                        | 10/917    | 73/18,800  | 0.00277  | 0.035321 | 0.030367 | PDGFD/CX3CR1/SELP/CCR2/ITGA4/MADCAM1/SELE/CXCL12/CCL21/FUT9             | 10    |
| BP       | GO:0033604 | Negative regulation of catecholamine secretion                | 4/917     | 13/18,800  | 0.002822 | 0.035882 | 0.03085  | ABAT/SYT4/CNR1/CHGA                                                     | 4     |
| BP       | GO:0086011 | Membrane repolarization during action potential               | 6/917     | 30/18,800  | 0.002874 | 0.03615  | 0.03108  | KCNJ5/KCNH7/KCND3/KCNA5/KCNJ3/KCNH6                                     | 6     |
| BP       | GO:0120162 | Positive regulation of cold-induced thermogenesis             | 12/917    | 98/18,800  | 0.002887 | 0.03615  | 0.03108  | ESRRG/GATM/CD36/ACADL/KSR2/PRLR/TSHR/GHRL/ADCYAP1/CCR2/ADIPOQ/FABP4     | 12    |
| BP       | GO:0007194 | Negative regulation of adenylate cyclase activity             | 5/917     | 21/18,800  | 0.00289  | 0.03615  | 0.03108  | ADGRV1/GALR1/P2RY13/CCR2/GPR87                                          | 5     |
| BP       | GO:0032098 | Regulation of appetite                                        | 5/917     | 21/18,800  | 0.00289  | 0.03615  | 0.03108  | SPX/CARTPT/GHRL/NPY/SCTR                                                | 5     |
| BP       | GO:0044241 | Lipid digestion                                               | 5/917     | 21/18,800  | 0.00289  | 0.03615  | 0.03108  | CEL/PNLIP/PNLIPRP2/CD36/ARX                                             | 5     |

**Supplementary Table S1** (Continued)

| Ontology | ID         | Description                                      | GeneRatio | BgRatio    | p-Value  | p.adjust | q-Value  | geneID                                                                                                                                                                                                                            | Count |
|----------|------------|--------------------------------------------------|-----------|------------|----------|----------|----------|-----------------------------------------------------------------------------------------------------------------------------------------------------------------------------------------------------------------------------------|-------|
| BP       | GO:0099558 | Maintenance of synapse structure                 | 5/917     | 21/18,800  | 0.00289  | 0.03615  | 0.03108  | ADGRB3/BSN/PCLO/CBLN1/CBLN4                                                                                                                                                                                                       | 5     |
| BP       | GO:0010720 | Positive regulation of cell development          | 26/917    | 297/18,800 | 0.002949 | 0.036785 | 0.031626 | NTRK2/AMIGO1/CX3CR1/PAK3/RELN/PDE3A/RET/NEURL1/KIT/SLITRK1/ASPA/MAPT/NKX6-1/SOX11/DSCAM/CXCL12/LPAR3/MYOC/ITPKA/ASCL1/FGA/NKX2-2/ADIPOQ/CAMK2B/FGF/FGG                                                                            | 26    |
| BP       | GO:0099175 | Regulation of postsynapse organization           | 11/917    | 86/18,800  | 0.003019 | 0.037562 | 0.032294 | NRCAM/NLGN1/PAK3/RELN/KIF1A/LRRTM2/GHRL/LRRK2/CBLN1/ITPKA/CAMK2B                                                                                                                                                                  | 11    |
| BP       | GO:0051932 | Synaptic transmission, gabaergic                 | 8/917     | 51/18,800  | 0.003065 | 0.038028 | 0.032695 | NLGN1/TACR1/NPY5R/PHF24/CNR1/GABRA4/GABRG2/GABRA2                                                                                                                                                                                 | 8     |
| BP       | GO:2001257 | Regulation of cation channel activity            | 18/917    | 180/18,800 | 0.003114 | 0.038533 | 0.033129 | AMIGO1/NLGN1/KCNAB1/NOS1/AKAP6/RELN/FGF12/EPO/DMD/CACNB2/PIRT/CRHBP/ANK2/CCR2/SHISA9/MAPK8IP2/CACNG5/ABCC8                                                                                                                        | 18    |
| BP       | GO:0015908 | Fatty acid transport                             | 12/917    | 99/18,800  | 0.003143 | 0.03879  | 0.03335  | SPX/PLA2G1B/CD36/ABCD2/SLC22A9/AVPR1B/SLC5A8/RBP2/CYP4A11/PMP2/FABP4/PLA2G2D                                                                                                                                                      | 12    |
| BP       | GO:0006939 | Smooth muscle contraction                        | 13/917    | 112/18,800 | 0.003171 | 0.03903  | 0.033556 | SPX/SCNN1B/P2RX1/ABAT/CHRM3/TACR1/SLC8A1/KIT/CHRN2/GHRL/SSTR2/CHRM2/KCNB2                                                                                                                                                         | 13    |
| BP       | GO:0045987 | Positive regulation of smooth muscle contraction | 6/917     | 31/18,800  | 0.00342  | 0.041937 | 0.036055 | SPX/ABAT/CHRM3/TACR1/KIT/GHRL                                                                                                                                                                                                     | 6     |
| BP       | GO:0018958 | Phenol-containing compound metabolic process     | 13/917    | 113/18,800 | 0.003427 | 0.041937 | 0.036055 | GCNT4/KL/RNF180/ABAT/GPR37/PAH/SLCO1C1/CHRN2/HPN/TPO/INSM1/DUOXA1/NPY                                                                                                                                                             | 13    |
| BP       | GO:1901652 | Response to peptide                              | 38/917    | 491/18,800 | 0.003464 | 0.041937 | 0.036055 | PLA2G1B/CELA2A/GRB14/PDK4/GLPD1/REG3G/KL/CD36/KLF15/TGFBR3/REG1B/CDO1/REG3A/ECHDC3/TSHR/GHRL/PDE3B/REG1A/CRHBP/NKX6-1/SPINK1/PCSK1/ITGA4/CACNA1B/ATP1A3/CXCL12/OTC/PRKCB/AGTR2/CASR/ABCC8/GLP1R/GCK/NR1H4/IGF1/ADIPOQ/TRARG1/PCK1 | 38    |
| BP       | GO:0007215 | Glutamate receptor signaling pathway             | 8/917     | 52/18,800  | 0.003471 | 0.041937 | 0.036055 | KCNB1/HOMER2/FRRS1L/GRIK5/GRIA2/GRIA4/PLP1/GRM4                                                                                                                                                                                   | 8     |
| BP       | GO:0086009 | Membrane repolarization                          | 8/917     | 52/18,800  | 0.003471 | 0.041937 | 0.036055 | KCNJ5/AKAP6/KCNH7/KCND3/ANK2/KCNA5/KCNJ3/KCNH6                                                                                                                                                                                    | 8     |
| BP       | GO:0097479 | Synaptic vesicle localization                    | 8/917     | 52/18,800  | 0.003471 | 0.041937 | 0.036055 | BRSK2/NLGN1/MAP2/PCLO/LRRK2/KIF5C/SNAP91/AP3B2                                                                                                                                                                                    | 8     |

(Continued)

**Supplementary Table S1** (Continued)

| Ontology | ID         | Description                                                         | GeneRatio | BgRatio    | p-Value  | p.adjust | q-Value  | geneID                                                                                                               | Count |
|----------|------------|---------------------------------------------------------------------|-----------|------------|----------|----------|----------|----------------------------------------------------------------------------------------------------------------------|-------|
| BP       | GO:0099172 | Presynapse organization                                             | 8/917     | 52/18,800  | 0.003471 | 0.041937 | 0.036055 | CEL/NLGN1/BSN/PCLO/SLITRK1/CBLN1/CNTN5/LRRTM3                                                                        | 8     |
| BP       | GO:0015698 | Inorganic anion transport                                           | 18/917    | 182/18,800 | 0.003505 | 0.042247 | 0.036322 | ABCB1/GABRB3/ANO5/ANO3/SLC26A4/SLC4A4/SLC4A10/ABCC9/SLC17A1/GLRA3/GABRA4/CASR/GABRG2/CFTR/CLIC3/GLRA1/GABRA2/SLC26A9 | 18    |
| BP       | GO:0006883 | Cellular sodium ion homeostasis                                     | 5/917     | 22/18,800  | 0.003592 | 0.042844 | 0.036836 | SCNN1B/SLC8A1/SCNN1G/ATP1A3/ATP4A                                                                                    | 5     |
| BP       | GO:0086012 | Membrane depolarization during cardiac muscle cell action potential | 5/917     | 22/18,800  | 0.003592 | 0.042844 | 0.036836 | CACNB2/SLC8A1/ANK2/SCN3B/HCN4                                                                                        | 5     |
| BP       | GO:0099500 | Vesicle fusion to plasma membrane                                   | 5/917     | 22/18,800  | 0.003592 | 0.042844 | 0.036836 | GRIK5/SYT9/SNAP25/CPLX2/TRARG1                                                                                       | 5     |
| BP       | GO:2000310 | Regulation of NMDA receptor activity                                | 5/917     | 22/18,800  | 0.003592 | 0.042844 | 0.036836 | NLGN1/RELN/CRHBP/CCR2/MAPK8IP2                                                                                       | 5     |
| BP       | GO:0043200 | Response to amino acid                                              | 13/917    | 114/18,800 | 0.003701 | 0.044025 | 0.037851 | CASTOR3/SLC1A2/NTRK2/AMIGO1/PDGFD/CASTOR2/CDO1/NEURL1/BCL11A/GLRA3/GLRA1/PCK1/SST                                    | 13    |
| BP       | GO:0098930 | Axonal transport                                                    | 9/917     | 64/18,800  | 0.003711 | 0.044032 | 0.037857 | SYBU/MAP2/KIF1A/DLG2/MAPT/KIF5C/AGBL4/AP3B2/CALY                                                                     | 9     |
| BP       | GO:0021953 | Central nervous system neuron differentiation                       | 17/917    | 169/18,800 | 0.003765 | 0.044297 | 0.038084 | NTRK2/PROX1/MAP2/CHRN2/SLC4A10/GDF7/MAPT/NKX6-1/CNTN2/ELAVL4/CBLN1/EOMES/AGBL4/ASCL1/NKX2-2/NPY/ARX                  | 17    |
| BP       | GO:0002864 | Regulation of acute inflammatory response to antigenic stimulus     | 4/917     | 14/18,800  | 0.0038   | 0.044297 | 0.038084 | NPY5R/CNR1/NPY/PLA2G2D                                                                                               | 4     |
| BP       | GO:0034392 | Negative regulation of smooth muscle cell apoptotic process         | 4/917     | 14/18,800  | 0.0038   | 0.044297 | 0.038084 | APOH/MIR210/GRIA4/IGF1                                                                                               | 4     |
| BP       | GO:0035589 | G protein-coupled purinergic nucleotide receptor signaling pathway  | 4/917     | 14/18,800  | 0.0038   | 0.044297 | 0.038084 | P2RY12/P2RY13/GPR34/GPR87                                                                                            | 4     |
| BP       | GO:0048681 | Negative regulation of axon regeneration                            | 4/917     | 14/18,800  | 0.0038   | 0.044297 | 0.038084 | RTN4RL1/KIAA0319/TNR/KLK8                                                                                            | 4     |

**Supplementary Table S1** (Continued)

| Ontology | ID         | Description                               | GeneRatio | BgRatio    | p-Value  | p.adjust | q-Value  | geneID                                                                                                                                                                                                                                                                                                                                                                                                                                                            | Count |
|----------|------------|-------------------------------------------|-----------|------------|----------|----------|----------|-------------------------------------------------------------------------------------------------------------------------------------------------------------------------------------------------------------------------------------------------------------------------------------------------------------------------------------------------------------------------------------------------------------------------------------------------------------------|-------|
| BP       | GO:0050930 | Induction of positive chemotaxis          | 4/917     | 14/18,800  | 0.0038   | 0.044297 | 0.038084 | VEGFD/CXCL12/SCG2/FGF10                                                                                                                                                                                                                                                                                                                                                                                                                                           | 4     |
| BP       | GO:0090128 | Regulation of synapse maturation          | 4/917     | 14/18,800  | 0.0038   | 0.044297 | 0.038084 | RELN/NRXN1/NEURL1/CAMK2B                                                                                                                                                                                                                                                                                                                                                                                                                                          | 4     |
| BP       | GO:0014003 | Oligodendrocyte development               | 7/917     | 42/18,800  | 0.003883 | 0.045151 | 0.038819 | CLU/ASPA/CNTN2/SOX11/ASCL1/NKX2-2/PLP1                                                                                                                                                                                                                                                                                                                                                                                                                            | 7     |
| BP       | GO:0007589 | Body fluid secretion                      | 11/917    | 89/18,800  | 0.003951 | 0.045824 | 0.039397 | ERBB4/CEL/SCNN1B/VIP/CDO1/CHRM3/TACR1/PRLR/NEURL1/SPINK1/FGF10                                                                                                                                                                                                                                                                                                                                                                                                    | 11    |
| BP       | GO:0071711 | Basement membrane organization            | 6/917     | 32/18,800  | 0.004038 | 0.046603 | 0.040067 | GAS2/CMA1/LAMB4/FLRT2/HPN/MMP11                                                                                                                                                                                                                                                                                                                                                                                                                                   | 6     |
| BP       | GO:0098703 | Calcium ion import across plasma membrane | 6/917     | 32/18,800  | 0.004038 | 0.046603 | 0.040067 | P2RX1/SLC8A3/SLC8A2/SLC8A1/CACNA1B/TRPV6                                                                                                                                                                                                                                                                                                                                                                                                                          | 6     |
| BP       | GO:0006940 | Regulation of smooth muscle contraction   | 9/917     | 65/18,800  | 0.004125 | 0.047488 | 0.040828 | SPX/P2RX1/ABAT/CHRM3/TACR1/KIT/GHRL/CHRM2/KCNB2                                                                                                                                                                                                                                                                                                                                                                                                                   | 9     |
| BP       | GO:0097529 | Myeloid leukocyte migration               | 21/917    | 229/18,800 | 0.004186 | 0.048076 | 0.041333 | C5/PLA2G1B/UMOD/PDGFDP/GP2/CX3CR1/VAV3/P2RY12/KIT/CTSG/CCR2/CCL14/VEGFD/CXCL12/SCG2/THBS4/CHGA/CCL21/CXCL9/S100A14/CCL19                                                                                                                                                                                                                                                                                                                                          | 21    |
| BP       | GO:0070252 | Actin-mediated cell contraction           | 12/917    | 103/18,800 | 0.004357 | 0.049915 | 0.042915 | MYH7/KCNJ5/MYLK2/FGF12/MYH6/CACNB2/KCND3/ANK2/SCN3B/KCNA5/KCNJ3/HCN4                                                                                                                                                                                                                                                                                                                                                                                              | 12    |
| CC       | GO:0019814 | Immunoglobulin complex                    | 51/967    | 167/19,594 | 7.67E-27 | 3.61E-24 | 2.76E-24 | IGKV2-28/IGKV2D-28/IGHV3-64/IGHV6-1/IGHV2-5/IGHV3-74/IGLV5-37/IGHV4-4/IGLV7-46/IGHV3-20/IGLV7-43/IGKV1D-39/IGKV1-12/IGHV3-7/IGHV3-15/IGKV1-39/IGHV1-45/JCHAIN/IGKV5-2/IGLV2-8/IGKV1D-13/IGHV3-72/IGLV2-18/IGKV1-17/IGKV2-24/IGHV3-48/IGHV2-26/IGHV3-49/IGHV4-28/IGKV1-6/IGLV4-60/IGLV6-57/IGKV1-16/IGLV4-69/IGLV10-54/IGHV5-51/IGLV3-27/IGLV5-45/IGKV4-1/IGHV1-69/IGLV3-19/IGHV4-39/IGKV3D-20/IGKV1-27/IGHV4-59/IGHA2/IGHV3-21/IGKV1-9/IGHV3-13/IGLV8-61/IGHV1-18 | 51    |
| CC       | GO:0009897 | External side of plasma membrane          | 73/967    | 455/19,594 | 2.88E-19 | 6.78E-17 | 5.19E-17 | NRCAM/SCNN1B/P2RX1/ABCB1/NLGN1/LIFR/GP2/CX3CR1/CA4/CD36/IL12RB2/TGFB3/NCAM1/FASLG/AQP4/SELP/PRLR/KIT/CHRN2/SCNN1G/IL5RA/ASTN1/ANPEP/CCR2/GFRA1/ITGA4/CXCR6/SELE/CCR5/CD8A/CXCL12/KCNJ3/GRIA2/SCARA5/GFRA3/IGHV3-64/CLEC10A/PTPRC/MS4A2/PKHD1/TLR8/FGA/XCR1/IGHV6-1/IGHV2-5/IGHV3-74/EPHA5/CLEC17A/IGHV4-4/FGF/GLRA1/IGHV3-20/IGHV3-7/IGHV3-15/CXCR5/                                                                                                              | 73    |

(Continued)

Supplementary Table S1 (Continued)

| Ontology | ID         | Description        | GeneRatio | BgRatio    | p-Value  | p.adjust | q-Value  | geneID                                                                                                                                                                                                                                                                                                                                                                                                                                                   | Count |
|----------|------------|--------------------|-----------|------------|----------|----------|----------|----------------------------------------------------------------------------------------------------------------------------------------------------------------------------------------------------------------------------------------------------------------------------------------------------------------------------------------------------------------------------------------------------------------------------------------------------------|-------|
|          |            |                    |           |            |          |          |          | IGHV1-45/CXCL9/IGHV3-72/SERPINA5/IGHV3-48/IGHV2-26/IGHV3-49/IGHV4-28/MS4A1/IGHV5-51/IGHV1-69/IGHV4-39/IGHV4-59/IGHA2/IGHV3-21/FGG/IGHV3-13/IGHV1-18                                                                                                                                                                                                                                                                                                      |       |
| CC       | GO:0098793 | Presynapse         | 72/967    | 492/19,594 | 8.81E-17 | 1.38E-14 | 1.06E-14 | SLC1A2/ERBB4/CTTNBP2/CEL/NTRK2/P2RX1/SYT6/NLGN1/KCNA2/SV2B/RAB3C/KCTD16/DNAJC6/SH3GL3/SLC8A3/SLC8A2/CACNB2/SLC6A4/SLC8A1/BSN/NRXN1/SCAMP5/PACIN1/KCNA3/PCLO/CHRNA2/SLC4A10/GRIK5/ATP2B2/SYT4/CRHBP/SLC18A3/UNC13A/CADPS/LRRK2/SLC29A4/RGS7BP/PCSK1/SYP/SYT9/SCGN/SLC18A2/SVOP/AVPR1B/KCNJ3/TRIM9/CNR1/RIMS2/SNAP25/LG13/RIMS1/PRKCB/SNAP91/SH3GL2/CASR/ABCC8/GPM6A/CADM3/CPLX2/CDH10/KCTD8/GAD2/SYT5/ATCAY/NPY/SLC6A17/PTPRN/CNTN5/GABRA2/UCN3/GRM4/SYT8 | 72    |
| CC       | GO:0043025 | Neuronal cell body | 69/967    | 482/19,594 | 1.25E-15 | 1.47E-13 | 1.12E-13 | PRKAR2B/SORBS2/CTNND2/TLL7/SERPINI1/AMIGO1/CX3CR1/KCNA2/RTN4RL1/MAP2/CKNSR2/VIP/SLC8A3/SLC8A2/RIC3/KCNB1/SLC5A7/SLC8A1/NRXN1/RET/KCND3/NEURL1/OLFM1/SLC4A10/PRPH/DLG2/ADCYAP1/GRIK5/ATP2B2/ASTN1/SYT4/MAPT/CRHBP/CCR2/LRRK2/CNTN2/RGS7BP/HPN/CNGA3/PCSK1/KIF5C/GFRA1/MAPK8IP2/DSCAM/ELAVL4/GLRA3/ITGA4/TUBB4A/DPYSL5/CACNA1B/ATP1A3/AVPR1B/GRIA2/NRSN1/KCNB2/PCSK2/GRIA4/CASR/GPM6A/SEZ6/ASCL1/CPLX2/EPHA5/SYT5/NPY/GLRA1/PTPRN/GABRA2/SST               | 69    |
| CC       | GO:0097060 | Synaptic membrane  | 59/967    | 373/19,594 | 1.69E-15 | 1.59E-13 | 1.21E-13 | SLC1A2/ERBB4/NRCAM/CEL/CHRNA3/SYNE1/P2RX1/NLGN1/KCNA2/KCTD16/GABRB3/CKNSR2/ADCY1/CHRM3/DMD/KCNB1/MAGEE1/SLC6A4/SLC8A1/NRXN1/KCNA3/KCND3/LRRTM2/CHRNA2/DLG2/SLITRK1/GRIK5/ATP2B2/MUSK/ANK2/UNC13A/CNTN2/SHISA9/RGS7BP/SYP/GLRA3/CBLN1/CACNG5/KCNJ3/CHRM2/GRIA2/CNR1/RIMS2/SNAP25/RIMS1/SNAP91/GRIA4/GABRA4/GABRG2/GPM6A/CADM3/CDH10/KCTD8/GAD2/GLRA1/CNTN5/GABRA2/LHFPL4/LRRTM3                                                                           | 59    |
| CC       | GO:0043204 | Perikaryon         | 34/967    | 153/19,594 | 9.19E-14 | 7.21E-12 | 5.51E-12 | CTNND2/TLL7/SERPINI1/AMIGO1/KCNA2/RTN4RL1/VIP/SLC8A3/SLC8A2/KCNB1/SLC5A7/NEURL1/OLFM1/SLC4A10/PRPH/DLG2/ADCYAP1/GRIK5/ASTN1/CRHBP/CCR2/LRRK2/RGS7BP/CNGA3/PCSK1/ELAVL4/GLRA3/AVPR1B/KCNB2/PCSK2/CPLX2/NPY/GLRA1/PTPRN                                                                                                                                                                                                                                    | 34    |

**Supplementary Table S1** (Continued)

| Ontology | ID         | Description                              | GeneRatio | BgRatio    | p-Value  | p.adjust | q-Value  | geneID                                                                                                                                                                                                                                                                                                         | Count |
|----------|------------|------------------------------------------|-----------|------------|----------|----------|----------|----------------------------------------------------------------------------------------------------------------------------------------------------------------------------------------------------------------------------------------------------------------------------------------------------------------|-------|
| CC       | GO:0034702 | Ion channel complex                      | 48/967    | 294/19,594 | 2.28E-13 | 1.53E-11 | 1.17E-11 | CHRN3/SCNN1B/KCNJ5/KCNA2/KCNAB1/AKAP6/KCNJ16/GABRB3/DPP10/SCN3A/CACNB2/KCNB1/KCNA3/SCN4A/UNC80/KCND3/CHRN2/SCNN1G/GRIK5/ABCC9/KCNV1/SHISA9/KCNJ11/CACNA2D2/SCN3B/CNGA3/SCN7A/GLRA3/CACNA1B/CACNG5/DPP6/KCNA5/KCNJ3/KCNMB2/GRIA2/HCN4/KCNB2/KCNG3/GRIA4/GABRA4/GABRG2/ABCC8/TRPV6/CFTR/KCNJ6/CLIC3/GLRA1/GABRA2 | 48    |
| CC       | GO:0042571 | Immunoglobulin complex, circulating      | 23/967    | 77/19,594  | 1.30E-12 | 7.66E-11 | 5.86E-11 | IGHV3-64/IGHV6-1/IGHV2-5/IGHV3-74/IGHV4-4/IGHV3-20/IGHV3-7/IGHV3-15/IGHV1-45/JCHAIN/IGHV3-72/IGHV3-48/IGHV2-26/IGHV3-49/IGHV4-28/IGHV5-51/IGHV1-69/IGHV4-39/IGHV4-59/IGHA2/IGHV3-21/IGHV3-13/IGHV1-18                                                                                                          | 23    |
| CC       | GO:0045211 | Postsynaptic membrane                    | 44/967    | 271/19,594 | 2.79E-12 | 1.46E-10 | 1.12E-10 | ERBB4/NRCAM/CEL/CHRN3/SYNE1/P2RX1/NLGN1/KCTD16/GABRB3/CNKSR2/ADCY1/CHRM3/DMD/KCNB1/MAGEE1/SLC6A4/SLC8A1/KCNA3/KCND3/LRRTM2/CHRN2/DLG2/SLITRK1/GRIK5/ATP2B2/MUSK/ANK2/CNTN2/SHISA9/RGS7BP/GLRA3/CBLN1/CACNG5/CHRM2/GRIA2/GRIA4/GABRA4/GABRG2/CDH10/KCTD8/GLRA1/GABRA2/LHFPL4/LRRTM3                             | 44    |
| CC       | GO:0034703 | Cation channel complex                   | 38/967    | 221/19,594 | 1.49E-11 | 7.00E-10 | 5.35E-10 | SCNN1B/KCNJ5/KCNA2/KCNAB1/AKAP6/KCNJ16/DPP10/SCN3A/CACNB2/KCNB1/KCNA3/SCN4A/UNC80/KCND3/SCNN1G/GRIK5/ABCC9/KCNV1/SHISA9/KCNJ11/CACNA2D2/SCN3B/CNGA3/SCN7A/CACNA1B/CACNG5/DPP6/KCNA5/KCNJ3/KCNMB2/GRIA2/HCN4/KCNB2/KCNG3/GRIA4/ABCC8/TRPV6/KCNJ6                                                                | 38    |
| CC       | GO:0099240 | Intrinsic component of synaptic membrane | 31/967    | 160/19,594 | 4.96E-11 | 2.12E-09 | 1.62E-09 | SLC1A2/ERBB4/NRCAM/CEL/P2RX1/NLGN1/KCNA2/ADCY1/SLC6A4/SLC8A1/KCNA3/KCND3/LRRTM2/CHRN2/SLITRK1/GRIK5/ATP2B2/CNTN2/SHISA9/RGS7BP/CACNG5/KCNJ3/CNR1/GABRA4/GABRG2/GPM6A/CADM3/CDH10/CNTN5/GABRA2/LRRTM3                                                                                                           | 31    |
| CC       | GO:0044306 | Neuron projection terminus               | 27/967    | 129/19,594 | 1.40E-10 | 5.49E-09 | 4.20E-09 | SLC1A2/NTRK2/KCNA2/SLC8A3/SLC8A2/DMD/SLC8A1/BSN/PACIN1/KCNA3/SLC4A10/GRIK5/CRHBP/SLC18A3/UNC13A/LRRK2/PCSK1/SYP/SCGN/SLC18A2/AVPR1B/PRKCB/CASR/CPLX2/NPY/PTPRN/UCN3                                                                                                                                            | 27    |
| CC       | GO:1902495 | Transmembrane transporter complex        | 50/967    | 377/19,594 | 1.87E-10 | 6.77E-09 | 5.18E-09 | CHRN3/SCNN1B/KCNJ5/KCNA2/KCNAB1/AKAP6/KCNJ16/GABRB3/DPP10/FXYD2/SCN3A/CACNB2/KCNB1/KCNA3/SCN4A/UNC80/KCND3/CHRN2/SCNN1G/GRIK5/ABCC9/KCNV1/SHISA9/KCNJ11/CACNA2D2/SCN3B/CNGA3/SCN7A/GLRA3/CACNA1B/CACNG5/ATP1A3/DPP6/KCNA5/KCNJ3/KCNMB2/                                                                        | 50    |

(Continued)



Supplementary Table S1 (Continued)

| Ontology | ID         | Description                                  | GeneRatio | BgRatio    | p-Value  | p.adjust | q-Value  | geneID                                                                                                                                                                                                                                                                                                                      | Count |
|----------|------------|----------------------------------------------|-----------|------------|----------|----------|----------|-----------------------------------------------------------------------------------------------------------------------------------------------------------------------------------------------------------------------------------------------------------------------------------------------------------------------------|-------|
|          |            |                                              |           |            |          |          |          | GRIA2/HCN4/KCNB2/KCNG3/GRIA4/GABRA4/GABRG2/ABCC8/TRPV6/CFTR/KCNJ6/CLIC3/GLRA1/GABRA2                                                                                                                                                                                                                                        |       |
| CC       | GO:0150034 | Distal axon                                  | 40/967    | 270/19,594 | 4.77E-10 | 1.60E-08 | 1.23E-08 | BRSK2/NTRK2/KCNA2/MAP2/SLC8A3/SLC8A2/SLC8A1/PACSN1/KCNA3/OLFM1/SLC4A10/GRIK5/PCDH9/MAPT/CRHBP/SLC18A3/UNC13A/LRRK2/PCSK1/KIF5C/SYP/SCGN/DSCAM/ELAVL4/SLC18A2/ITGA4/STMN4/AVPR1B/CNR1/SNAP25/NRSN1/PRKCB/CASR/GPM6A/CPLX2/ATCAY/NPY/PTPRN/CDK5R2/UCN3                                                                        | 40    |
| CC       | GO:0099699 | Integral component of synaptic membrane      | 28/967    | 149/19,594 | 8.86E-10 | 2.78E-08 | 2.13E-08 | SLC1A2/ERBB4/NRCAM/CEL/P2RX1/NLGN1/KCNA2/ADCY1/SLC6A4/SLC8A1/KCNA3/KCND3/LRRTM2/CHRN2/SLITRK1/GRIK5/ATP2B2/SHISA9/CACNG5/KCNJ3/CNR1/GABRA4/GABRG2/GPM6A/CADM3/CDH10/GABRA2/LRRTM3                                                                                                                                           | 28    |
| CC       | GO:0031045 | Dense core granule                           | 12/967    | 26/19,594  | 9.92E-10 | 2.92E-08 | 2.23E-08 | SPX/MYRIP/KIF1A/SYT4/CRHBP/CADPS/SYT9/SCG2/SYT5/NPY/CHGA/SYT8                                                                                                                                                                                                                                                               | 12    |
| CC       | GO:0043679 | Axon terminus                                | 24/967    | 113/19,594 | 1.07E-09 | 2.98E-08 | 2.27E-08 | NTRK2/KCNA2/SLC8A3/SLC8A2/SLC8A1/PACSN1/KCNA3/SLC4A10/GRIK5/CRHBP/SLC18A3/UNC13A/LRRK2/PCSK1/SYP/SCGN/SLC18A2/AVPR1B/PRKCB/CASR/CPLX2/NPY/PTPRN/UCN3                                                                                                                                                                        | 24    |
| CC       | GO:1990351 | Transporter complex                          | 50/967    | 399/19,594 | 1.36E-09 | 3.57E-08 | 2.73E-08 | CHRN2/SCNN1B/KCNJ5/KCNA2/KCNAB1/AKAP6/KCNJ16/GABRB3/DPP10/FXYD2/SCN3A/CACNB2/KCNB1/KCNA3/SCN4A/UNC80/KCND3/CHRN2/SCNN1G/GRIK5/ABCC9/KCNV1/SHISA9/KCNJ11/CACNA2D2/SCN3B/CNGA3/SCN7A/GLRA3/CACNA1B/CACNG5/ATP1A3/DPP6/KCNA5/KCNJ3/KCNMB2/GRIA2/HCN4/KCNB2/KCNG3/GRIA4/GABRA4/GABRG2/ABCC8/TRPV6/CFTR/KCNJ6/CLIC3/GLRA1/GABRA2 | 50    |
| CC       | GO:0034705 | Potassium channel complex                    | 21/967    | 89/19,594  | 1.56E-09 | 3.86E-08 | 2.95E-08 | KCNJ5/KCNA2/KCNAB1/KCNJ16/DPP10/KCNB1/KCNA3/KCND3/GRIK5/ABCC9/KCNV1/KCNJ11/DPP6/KCNA5/KCNJ3/KCNMB2/HCN4/KCNB2/KCNG3/ABCC8/KCNJ6                                                                                                                                                                                             | 21    |
| CC       | GO:0098936 | Intrinsic component of postsynaptic membrane | 24/967    | 123/19,594 | 6.45E-09 | 1.52E-07 | 1.16E-07 | ERBB4/NRCAM/CEL/P2RX1/NLGN1/ADCY1/SLC6A4/SLC8A1/KCNA3/KCND3/LRRTM2/CHRN2/SLITRK1/GRIK5/ATP2B2/CNTN2/SHISA9/RGS7BP/CACNG5/GABRA4/GABRG2/CDH10/GABRA2/LRRTM3                                                                                                                                                                  | 24    |

**Supplementary Table S1** (Continued)

| Ontology | ID         | Description                                                 | GeneRatio | BgRatio    | p-Value  | p.adjust | q-Value  | geneID                                                                                                                                                                                                                                                                                                | Count |
|----------|------------|-------------------------------------------------------------|-----------|------------|----------|----------|----------|-------------------------------------------------------------------------------------------------------------------------------------------------------------------------------------------------------------------------------------------------------------------------------------------------------|-------|
| CC       | GO:0042734 | Presynaptic membrane                                        | 26/967    | 143/19,594 | 7.28E-09 | 1.63E-07 | 1.25E-07 | SLC1A2/ERBB4/P2RX1/KCNA2/KCTD16/SLC6A4/NRXN1/KCNA3/CHRN2/GRIK5/ATP2B2/UNC13A/RGS7BP/SYP/KCNJ3/CNR1/RIMS2/SNAP25/RIMS1/SNAP91/GPM6A/CADM3/CDH10/KCTD8/GAD2/CNTN5                                                                                                                                       | 26    |
| CC       | GO:0062023 | Collagen-containing extracellular matrix                    | 49/967    | 429/19,594 | 4.12E-08 | 8.83E-07 | 6.75E-07 | FGL1/CLU/PRSS1/CMA1/LAMB4/MMRN1/NCAM1/GDF10/SBSPON/ANGPTL1/ATRNL1/AMBP/TNR/VTN/FCN2/COL21A1/CTSG/APOH/SFRP1/MATN4/FREM1/COL25A1/TNXB/APLP1/CBLN1/ABI3BP/CXCL12/COL14A1/MYOC/OGN/COL7A1/THBS4/FGA/CBLN4/COL19A1/FGF10/VIT/ADIPOQ/FGF/KRT1/COL11A1/FIBCD1/SERPINA5/ANGPTL7/COL17A1/APCS/LRRC15/ZG16/FGG | 49    |
| CC       | GO:0099634 | Postsynaptic specialization membrane                        | 22/967    | 116/19,594 | 4.69E-08 | 9.61E-07 | 7.35E-07 | ERBB4/NRCAM/CEL/NLGN1/CNKSR2/ADCY1/KCND3/LRRTM2/CHRN2/DLG2/SLITRK1/GRIK5/ATP2B2/SHISA9/RGS7BP/CACNG5/GRIA2/GABRA4/GABRG2/CDH10/GABRA2/LRRTM3                                                                                                                                                          | 22    |
| CC       | GO:0098948 | Intrinsic component of postsynaptic specialization membrane | 18/967    | 80/19,594  | 5.04E-08 | 9.89E-07 | 7.56E-07 | ERBB4/NRCAM/CEL/NLGN1/ADCY1/KCND3/LRRTM2/CHRN2/SLITRK1/GRIK5/ATP2B2/SHISA9/RGS7BP/GABRA4/GABRG2/CDH10/GABRA2/LRRTM3                                                                                                                                                                                   | 18    |
| CC       | GO:0099055 | Integral component of postsynaptic membrane                 | 22/967    | 118/19,594 | 6.47E-08 | 1.22E-06 | 9.31E-07 | ERBB4/NRCAM/CEL/P2RX1/NLGN1/ADCY1/SLC6A4/SLC8A1/KCNA3/KCND3/LRRTM2/CHRN2/SLITRK1/GRIK5/ATP2B2/SHISA9/CACNG5/GABRA4/GABRG2/CDH10/GABRA2/LRRTM3                                                                                                                                                         | 22    |
| CC       | GO:0099060 | Integral component of postsynaptic specialization membrane  | 17/967    | 77/19,594  | 1.59E-07 | 2.87E-06 | 2.20E-06 | ERBB4/NRCAM/CEL/NLGN1/ADCY1/KCND3/LRRTM2/CHRN2/SLITRK1/GRIK5/ATP2B2/SHISA9/GABRA4/GABRG2/CDH10/GABRA2/LRRTM3                                                                                                                                                                                          | 17    |
| CC       | GO:0098978 | Glutamatergic synapse                                       | 39/967    | 319/19,594 | 1.72E-07 | 2.99E-06 | 2.29E-06 | SLC1A2/PRKAR2B/ERBB4/NRCAM/CTTNBP2/P2RX1/NLGN1/PAK3/CNKSR2/SH3GL3/ADCY1/HOMER2/BSN/TNR/KCNA3/PCLO/LRRTM2/GHRL/SLITRK1/GRIK5/ATP2B2/SYT4/CADPS/LRRK2/SHISA9/RGS7BP/ELAVL4/CBLN1/CACNG5/CNR1/SNAP25/SH3GL2/GABRG2/GPM6A/CPLX2/CDH10/SLC6A17/CALY/LRRTM3                                                 | 39    |
| CC       | GO:0008076 | Voltage-gated potassium channel complex                     | 17/967    | 79/19,594  | 2.35E-07 | 3.96E-06 | 3.03E-06 | KCNJ5/KCNA2/KCNAB1/KCNJ16/DPP10/KCNB1/KCNA3/KCND3/KCNV1/DPP6/KCNA5/KCNJ3/KCNMB2/HCN4/KCNB2/KCNG3/KCNJ6                                                                                                                                                                                                | 17    |

(Continued)

**Supplementary Table S1** (Continued)

| Ontology | ID         | Description                                 | GeneRatio | BgRatio    | p-Value  | p.adjust | q-Value  | geneID                                                                                                                                                                                                                                                     | Count |
|----------|------------|---------------------------------------------|-----------|------------|----------|----------|----------|------------------------------------------------------------------------------------------------------------------------------------------------------------------------------------------------------------------------------------------------------------|-------|
| CC       | GO:0098889 | Intrinsic component of presynaptic membrane | 16/967    | 74/19,594  | 4.95E-07 | 8.05E-06 | 6.15E-06 | SLC1A2/ERBB4/P2RX1/KCNA2/SLC6A4/KCNA3/CHRN2/GRIK5/ATP2B2/RGS7BP/KCNJ3/CNR1/GPM6A/CADM3/CDH10/CNTN5                                                                                                                                                         | 16    |
| CC       | GO:0072562 | Blood microparticle                         | 23/967    | 147/19,594 | 8.78E-07 | 1.38E-05 | 1.05E-05 | CLU/ALB/PRSS1/GC/AMBP/VTN/FCN2/AFM/C8A/IGKV2D-28/C4BPA/FGA/FGB/KRT1/IGHV3-7/IGKV1-39/JCHAIN/IGKV1-17/APCS/IGKV4-1/IGHA2/FGG/IGHV3-13                                                                                                                       | 23    |
| CC       | GO:0098992 | Neuronal dense core vesicle                 | 7/967     | 13/19,594  | 9.22E-07 | 1.40E-05 | 1.07E-05 | KIF1A/SYT4/CADPS/SCG2/SYT5/NPY/CHGA                                                                                                                                                                                                                        | 7     |
| CC       | GO:0099572 | Postsynaptic specialization                 | 39/967    | 341/19,594 | 9.59E-07 | 1.41E-05 | 1.08E-05 | ERBB4/NRCAM/CEL/NTRK2/CTNND2/NLGN1/NOS1/BNIP3/PAK3/CNKSR2/DNAJC6/SH3GL3/ADCY1/SLC8A3/SLC8A2/ANKS1B/HOMER2/SLC8A1/BSN/PCLO/KCND3/NEURL1/LRRTM2/CHRN2/DLG2/SLITRK1/GRIK5/BCL11A/ATP2B2/SHISA9/RGS7BP/MAPK8IP2/CACNG5/GRIA2/GABRA4/GABRG2/CDH10/GABRA2/LRRTM3 | 39    |
| CC       | GO:0044304 | Main axon                                   | 14/967    | 61/19,594  | 1.19E-06 | 1.70E-05 | 1.30E-05 | SLC1A2/NRCAM/KCNA2/KCNAB1/MAP2/NFASC/DLG2/MAPT/CRHBP/CNTN2/CNGA3/TUBB4A/MYOC/UCN3                                                                                                                                                                          | 14    |
| CC       | GO:0098982 | GABA-ergic synapse                          | 15/967    | 70/19,594  | 1.27E-06 | 1.76E-05 | 1.34E-05 | ERBB4/BSN/PCLO/KCND3/LRRTM2/SLITRK1/ATP2B2/CNR1/GABRA4/GABRG2/CDH10/CBLN4/SLC6A17/CNTN5/GABRA2                                                                                                                                                             | 15    |
| CC       | GO:0030672 | Synaptic vesicle membrane                   | 18/967    | 103/19,594 | 2.66E-06 | 3.49E-05 | 2.66E-05 | SYT6/SV2B/RAB3C/BSN/SCAMP5/SYT4/UNC13A/LRRK2/SYP/SYT9/SLC18A2/SVOP/ABCC8/GAD2/SYT5/SLC6A17/GABRA2/SYT8                                                                                                                                                     | 18    |
| CC       | GO:0099501 | Exocytic vesicle membrane                   | 18/967    | 103/19,594 | 2.66E-06 | 3.49E-05 | 2.66E-05 | SYT6/SV2B/RAB3C/BSN/SCAMP5/SYT4/UNC13A/LRRK2/SYP/SYT9/SLC18A2/SVOP/ABCC8/GAD2/SYT5/SLC6A17/GABRA2/SYT8                                                                                                                                                     | 18    |
| CC       | GO:0099056 | Integral component of presynaptic membrane  | 14/967    | 67/19,594  | 3.92E-06 | 4.99E-05 | 3.81E-05 | SLC1A2/ERBB4/P2RX1/KCNA2/SLC6A4/KCNA3/CHRN2/GRIK5/ATP2B2/KCNJ3/CNR1/GPM6A/CADM3/CDH10                                                                                                                                                                      | 14    |
| CC       | GO:0016324 | Apical plasma membrane                      | 37/967    | 358/19,594 | 1.86E-05 | 0.00023  | 0.000176 | SCNN1B/SORBS2/ABCB1/UMOD/GP2/CA4/TRPM6/KL/CD36/SLC38A3/SLC2A2/SLC26A4/SLC4A10/SCNN1G/PDZK1/ATP2B2/SLC17A4/AJAP1/CD300LG/DPEP1/ANK2/ADGRG2/SLC17A1/SLC29A4/HPN/SLC3A1/KCNA5/SLC5A8/SLC10A2/CASR/ATP4A/PKHD1/CBLIF/CYP4A11/CFTR/PAPPA2/SLC26A9               | 37    |

**Supplementary Table S1** (Continued)

| Ontology | ID         | Description                | GeneRatio | BgRatio    | p-Value  | p.adjust | q-Value  | geneID                                                                                                                                                                                                                                                                   | Count |
|----------|------------|----------------------------|-----------|------------|----------|----------|----------|--------------------------------------------------------------------------------------------------------------------------------------------------------------------------------------------------------------------------------------------------------------------------|-------|
| CC       | GO:0098984 | Neuron to neuron synapse   | 36/967    | 347/19,594 | 2.21E-05 | 0.000267 | 0.000204 | <i>ERBB4/NRCAM/NTRK2/CTNND2/NLGN1/NOS1/BNIP3/PAK3/CNKSR2/DNAJC6/SH3GL3/AKAP7/ADCY1/SLC8A3/SLC8A2/ANKS1B/HOMER2/SLC8A1/BSN/PCLO/KCND3/NEURL1/LRRTM2/DLG2/SLITRK1/GRIK5/BCL11A/ATP2B2/SHISA9/RGS7BP/SYT9/MAPK8IP2/CACNG5/ATP1A3/GRIA2/LRRTM3</i>                           | 36    |
| CC       | GO:0030658 | Transport vesicle membrane | 25/967    | 205/19,594 | 2.84E-05 | 0.000335 | 0.000256 | <i>SYT6/CA4/SV2B/RAB3C/BSN/SCAMP5/SYT4/SLC18A3/UNC13A/LRRK2/SYP/SYT9/SCGN/SLC18A2/SCG3/SVOP/CPE/ABCC8/GAD2/SYT5/SLC6A17/PTPRN/SLC30A8/GABRA2/SYT8</i>                                                                                                                    | 25    |
| CC       | GO:0014069 | Postsynaptic density       | 33/967    | 318/19,594 | 4.77E-05 | 0.000548 | 0.000419 | <i>ERBB4/NRCAM/NTRK2/CTNND2/NLGN1/NOS1/BNIP3/PAK3/CNKSR2/DNAJC6/SH3GL3/ADCY1/SLC8A3/SLC8A2/ANKS1B/HOMER2/SLC8A1/BSN/PCLO/KCND3/NEURL1/LRRTM2/DLG2/SLITRK1/GRIK5/BCL11A/ATP2B2/SHISA9/RGS7BP/MAPK8IP2/CACNG5/GRIA2/LRRTM3</i>                                             | 33    |
| CC       | GO:0032279 | Asymmetric synapse         | 33/967    | 323/19,594 | 6.48E-05 | 0.000727 | 0.000556 | <i>ERBB4/NRCAM/NTRK2/CTNND2/NLGN1/NOS1/BNIP3/PAK3/CNKSR2/DNAJC6/SH3GL3/ADCY1/SLC8A3/SLC8A2/ANKS1B/HOMER2/SLC8A1/BSN/PCLO/KCND3/NEURL1/LRRTM2/DLG2/SLITRK1/GRIK5/BCL11A/ATP2B2/SHISA9/RGS7BP/MAPK8IP2/CACNG5/GRIA2/LRRTM3</i>                                             | 33    |
| CC       | GO:0045177 | Apical part of cell        | 40/967    | 424/19,594 | 6.95E-05 | 0.000762 | 0.000582 | <i>AQP8/EPB41L4B/SCNN1B/SORBS2/ABCB1/UMOD/GP2/CA4/TRPM6/KL/CD36/HOMER2/SLC38A3/SLC2A2/SLC26A4/SLC4A10/SCNN1G/PDZK1/ATP2B2/SLC17A4/AJAP1/CD300LG/DPEP1/ANK2/ADGRG2/SLC17A1/SLC29A4/HPN/SLC3A1/KCNA5/SLC5A8/SLC10A2/CASR/ATP4A/PKHD1/CBLIF/CYP4A11/CFTR/PAPPA2/SLC26A9</i> | 40    |
| CC       | GO:0043195 | Terminal bouton            | 10/967    | 48/19,594  | 9.66E-05 | 0.001022 | 0.000781 | <i>NTRK2/GRIK5/SLC18A3/UNC13A/LRRK2/SYP/SCGN/SLC18A2/CPLX2/NPY</i>                                                                                                                                                                                                       | 10    |
| CC       | GO:0044298 | Cell body membrane         | 8/967     | 31/19,594  | 9.77E-05 | 0.001022 | 0.000781 | <i>AMIGO1/CX3CR1/KCNA2/P2RY12/KCNB1/ATP2B2/ATP1A3/KCNB2</i>                                                                                                                                                                                                              | 8     |
| CC       | GO:0030133 | Transport vesicle          | 38/967    | 402/19,594 | 0.0001   | 0.001028 | 0.000786 | <i>SPX/MYRIP/CTTNBP2/SYT6/CA4/SV2B/RAB3C/BSN/SCAMP5/SYT4/SLC18A3/UNC13A/LRRK2/IL33/PCSK1/SYP/SYT9/SCGN/SLC18A2/SCG3/SVOP/CPE/TRIM9/SNAP25/NRSN1/LG13/SNAP91/PCSK2/ABCC8/GAD2/SYT5/IGF1/CHGA/SLC6A17/PTPRN/SLC30A8/GABRA2/SYT8</i>                                        | 38    |

(Continued)

Supplementary Table S1 (Continued)

| Ontology | ID         | Description                                          | GeneRatio | BgRatio    | p-Value  | p.adjust | q-Value  | geneID                                                                                                                                                                          | Count |
|----------|------------|------------------------------------------------------|-----------|------------|----------|----------|----------|---------------------------------------------------------------------------------------------------------------------------------------------------------------------------------|-------|
| CC       | GO:0008021 | Synaptic vesicle                                     | 23/967    | 196/19,594 | 0.000106 | 0.001063 | 0.000812 | CTTNBP2/SYT6/SV2B/RAB3C/BSN/SCAMP5/SYT4/<br>UNC13A/LRRK2/SYP/SYT9/SLC18A2/SVOP/TRIM9/<br>SNAP25/LGI3/SNAP91/ABCC8/GAD2/SYT5/SLC6A17/<br>GABRA2/SYT8                             | 23    |
| CC       | GO:0098839 | Postsynaptic density membrane                        | 14/967    | 89/19,594  | 0.000111 | 0.001093 | 0.000835 | ERBB4/NRCAM/CNKSR2/ADCY1/LRRTM2/DLG2/<br>SLITRK1/GRIK5/ATP2B2/SHISA9/RGS7BP/CACNG5/<br>GRIA2/LRRTM3                                                                             | 14    |
| CC       | GO:0016323 | Basolateral plasma membrane                          | 25/967    | 226/19,594 | 0.000141 | 0.001355 | 0.001035 | ERBB4/UMOD/SLC16A12/SLCO4C1/KCNJ16/CHRM3/<br>SLC8A2/SLC38A3/AQP4/SLCO1C1/TSHR/SLC4A4/<br>SLC4A10/DLG2/ATP2B2/AJAP1/CD300LG/ANK2/<br>SLC29A4/ABCA8/SLC22A9/CASR/SLC39A5/MTTP/CA9 | 25    |
| CC       | GO:0070382 | Exocytic vesicle                                     | 24/967    | 214/19,594 | 0.000154 | 0.00145  | 0.001108 | CTTNBP2/SYT6/SV2B/RAB3C/BSN/SCAMP5/SYT4/<br>UNC13A/LRRK2/SYP/SYT9/SLC18A2/SVOP/TRIM9/<br>SNAP25/LGI3/SNAP91/ABCC8/GAD2/SYT5/IGF1/<br>SLC6A17/GABRA2/SYT8                        | 24    |
| CC       | GO:0034706 | Sodium channel complex                               | 7/967     | 26/19,594  | 0.000201 | 0.001855 | 0.001418 | SCNN1B/SCN3A/SCN4A/SCNN1G/GRIK5/SCN3B/<br>SCN7A                                                                                                                                 | 7     |
| CC       | GO:0099146 | Intrinsic component of postsynaptic density membrane | 10/967    | 54/19,594  | 0.00027  | 0.002447 | 0.00187  | ERBB4/NRCAM/ADCY1/LRRTM2/SLITRK1/GRIK5/<br>ATP2B2/SHISA9/RGS7BP/LRRTM3                                                                                                          | 10    |
| CC       | GO:0043194 | Axon initial segment                                 | 6/967     | 20/19,594  | 0.000303 | 0.002697 | 0.002061 | NRCAM/KCNA2/MAP2/NFASC/CNTN2/CNGA3                                                                                                                                              | 6     |
| CC       | GO:0043197 | Dendritic spine                                      | 20/967    | 172/19,594 | 0.000329 | 0.00284  | 0.00217  | PRKAR2B/CTTNBP2/NTRK2/NLGN1/NOS1/SLC8A3/<br>SLC8A2/ANKS1B/SLC8A1/KCND3/NEURL1/ATP2B2/<br>MAPT/SHISA9/RGS7BP/GRIA2/GRIA4/IITPKA/GPM6A/<br>SEZ6                                   | 20    |
| CC       | GO:0032809 | Neuronal cell body membrane                          | 7/967     | 28/19,594  | 0.000332 | 0.00284  | 0.00217  | AMIGO1/CX3CR1/KCNA2/KCNB1/ATP2B2/ATP1A3/<br>KCNB2                                                                                                                               | 7     |
| CC       | GO:0044309 | Neuron spine                                         | 20/967    | 173/19,594 | 0.000355 | 0.00299  | 0.002285 | PRKAR2B/CTTNBP2/NTRK2/NLGN1/NOS1/SLC8A3/<br>SLC8A2/ANKS1B/SLC8A1/KCND3/NEURL1/ATP2B2/<br>MAPT/SHISA9/RGS7BP/GRIA2/GRIA4/IITPKA/GPM6A/<br>SEZ6                                   | 20    |
| CC       | GO:0097440 | Apical dendrite                                      | 5/967     | 15/19,594  | 0.000575 | 0.004748 | 0.003629 | CLU/MAP2/NEURL1/SLC4A10/SEZ6                                                                                                                                                    | 5     |
| CC       | GO:0009925 | Basal plasma membrane                                | 25/967    | 251/19,594 | 0.000696 | 0.005648 | 0.004317 | ERBB4/UMOD/SLC16A12/SLCO4C1/KCNJ16/CHRM3/<br>SLC8A2/SLC38A3/AQP4/SLCO1C1/TSHR/SLC4A4/<br>SLC4A10/DLG2/ATP2B2/AJAP1/CD300LG/ANK2/<br>SLC29A4/ABCA8/SLC22A9/CASR/SLC39A5/MTTP/CA9 | 25    |
| CC       | GO:0042383 | Sarcolemma                                           | 16/967    | 131/19,594 | 0.000736 | 0.005872 | 0.004488 | SNTG2/NOS1/AKAP6/SLC8A3/SLC8A2/DMD/CACNB2/<br>KCNB1/SLC8A1/AQP4/KCND3/ANK2/KCNJ11/PGM5/<br>KCNJ3/ABCC8                                                                          | 16    |

**Supplementary Table S1** (Continued)

| Ontology | ID         | Description                                         | GeneRatio | BgRatio    | p-Value  | p.adjust | q-Value  | geneID                                                                                                                                                                     | Count |
|----------|------------|-----------------------------------------------------|-----------|------------|----------|----------|----------|----------------------------------------------------------------------------------------------------------------------------------------------------------------------------|-------|
| CC       | GO:0099061 | Integral component of postsynaptic density membrane | 9/967     | 51/19,594  | 0.000784 | 0.006155 | 0.004704 | <i>ERBB4/NRCAM/ADCY1/LRRTM2/SLITRK1/GRIK5/ATP2B2/SHISA9/LRRTM3</i>                                                                                                         | 9     |
| CC       | GO:0098831 | Presynaptic active zone cytoplasmic component       | 5/967     | 16/19,594  | 0.000802 | 0.006192 | 0.004733 | <i>BSN/PCLO/UNC13A/RIMS2/RIMS1</i>                                                                                                                                         | 5     |
| CC       | GO:0097386 | Glial cell projection                               | 7/967     | 33/19,594  | 0.000965 | 0.007172 | 0.005481 | <i>SLC1A2/NFASC/AQP4/SYT4/MAPT/CNGA3/SCN7A</i>                                                                                                                             | 7     |
| CC       | GO:0044224 | Juxtaparanode region of axon                        | 4/967     | 10/19,594  | 0.000974 | 0.007172 | 0.005481 | <i>KCNA2/KCNAB1/DLG2/CNTN2</i>                                                                                                                                             | 4     |
| CC       | GO:0099569 | Presynaptic cytoskeleton                            | 4/967     | 10/19,594  | 0.000974 | 0.007172 | 0.005481 | <i>BSN/PCLO/RIMS2/RIMS1</i>                                                                                                                                                | 4     |
| CC       | GO:0031091 | Platelet alpha granule                              | 12/967    | 91/19,594  | 0.00169  | 0.012245 | 0.009359 | <i>CLU/ALB/CD36/MMRN1/SELP/EGF/VEGFD/FGA/IGF1/FGB/SERPINA5/FGG</i>                                                                                                         | 12    |
| CC       | GO:0031225 | Anchored component of membrane                      | 18/967    | 169/19,594 | 0.00177  | 0.012634 | 0.009656 | <i>UMOD/GP2/CA4/RTN4RL1/RAB3C/NCAM1/DPEP1/CNTN2/RGS7BP/GFRA1/ART4/ART3/GFRA3/PKHD1/GAD2/CNTN5/XPNPEP2/MSLN</i>                                                             | 18    |
| CC       | GO:0045178 | Basal part of cell                                  | 25/967    | 269/19,594 | 0.001849 | 0.013    | 0.009937 | <i>ERBB4/UMOD/SLC16A12/SLCO4C1/KCNJ16/CHRM3/SLC8A2/SLC38A3/AQP4/SLCO1C1/TSHR/SLC4A4/SLC4A10/DLG2/ATP2B2/AJAP1/CD300LG/ANK2/SLC29A4/ABCA8/SLC22A9/CASR/SLC39A5/MTTP/CA9</i> | 25    |
| CC       | GO:0060077 | Inhibitory synapse                                  | 5/967     | 19/19,594  | 0.001887 | 0.013069 | 0.009989 | <i>GABRG2/GAD2/GLRA1/GABRA2/LHFPL4</i>                                                                                                                                     | 5     |
| CC       | GO:0032589 | Neuron projection membrane                          | 9/967     | 58/19,594  | 0.002017 | 0.013768 | 0.010523 | <i>SLC1A2/ADGRV1/KCNB1/ATP2B2/MAPT/SHISA9/GABRA4/GABRG2/GABRA2</i>                                                                                                         | 9     |
| CC       | GO:0045121 | Membrane raft                                       | 28/967    | 326/19,594 | 0.003237 | 0.021783 | 0.016649 | <i>SLC1A2/PRKAR2B/P2RX1/GP2/NOS1/AKAP6/RTN4RL1/CD36/FYB2/ADCY1/DMD/SLC6A4/FASLG/TNR/KCNA3/RET/CHRN2/PDZK1/ATP2B2/MAPT/ANK2/LRRK2/SELE/KCNA5/CD8A/CNR1/PTPRC/MS4A1</i>      | 28    |
| CC       | GO:0060076 | Excitatory synapse                                  | 8/967     | 51/19,594  | 0.003295 | 0.021859 | 0.016708 | <i>NLGN1/BSN/LRRTM2/ATP2B2/SYP/CBLN1/KCNJ3/GRIA2</i>                                                                                                                       | 8     |
| CC       | GO:0098857 | Membrane microdomain                                | 28/967    | 327/19,594 | 0.003379 | 0.022106 | 0.016896 | <i>SLC1A2/PRKAR2B/P2RX1/GP2/NOS1/AKAP6/RTN4RL1/CD36/FYB2/ADCY1/DMD/SLC6A4/FASLG/TNR/KCNA3/RET/CHRN2/PDZK1/ATP2B2/MAPT/ANK2/LRRK2/SELE/KCNA5/CD8A/CNR1/PTPRC/MS4A1</i>      | 28    |
| CC       | GO:0048786 | Presynaptic active zone                             | 10/967    | 75/19,594  | 0.003685 | 0.023736 | 0.018142 | <i>P2RX1/BSN/PCLO/ATP2B2/UNC13A/SYP/RIMS2/RIMS1/GPM6A/CDH10</i>                                                                                                            | 10    |
| CC       | GO:0034707 | Chloride channel complex                            | 8/967     | 52/19,594  | 0.003729 | 0.023736 | 0.018142 | <i>GABRB3/GLRA3/GABRA4/GABRG2/CFTR/CLIC3/GLRA1/GABRA2</i>                                                                                                                  | 8     |

(Continued)

Supplementary Table S1 (Continued)

| Ontology | ID         | Description                                             | GeneRatio | BgRatio    | p-Value  | p.adjust | q-Value  | geneID                                                                                                                                                                                                                                                                                                                                                            | Count |
|----------|------------|---------------------------------------------------------|-----------|------------|----------|----------|----------|-------------------------------------------------------------------------------------------------------------------------------------------------------------------------------------------------------------------------------------------------------------------------------------------------------------------------------------------------------------------|-------|
| CC       | GO:0099059 | Integral component of presynaptic active zone membrane  | 4/967     | 14/19,594  | 0.003965 | 0.024898 | 0.01903  | <i>P2RX1/ATP2B2/GPM6A/CDH10</i>                                                                                                                                                                                                                                                                                                                                   | 4     |
| CC       | GO:0031093 | Platelet alpha granule lumen                            | 9/967     | 67/19,594  | 0.005462 | 0.033851 | 0.025874 | <i>CLU/ALB/MMRN1/EGF/VEGFD/FGA/IGF1/FGB/FGG</i>                                                                                                                                                                                                                                                                                                                   | 9     |
| CC       | GO:0030426 | Growth cone                                             | 16/967    | 161/19,594 | 0.006097 | 0.037292 | 0.028504 | <i>MAP2/OLFM1/PCDH9/MAPT/LRRK2/KIF5C/DSCAM/ELAVL4/ITGA4/STMN4/CNR1/SNAP25/NRSN1/GPM6A/ATCAY/CDK5R2</i>                                                                                                                                                                                                                                                            | 16    |
| CC       | GO:0031528 | Microvillus membrane                                    | 5/967     | 26/19,594  | 0.008018 | 0.048419 | 0.037008 | <i>PDZK1/DPEP1/MTPP/S100P/CA9</i>                                                                                                                                                                                                                                                                                                                                 | 5     |
| CC       | GO:0001518 | Voltage-gated sodium channel complex                    | 4/967     | 17/19,594  | 0.008377 | 0.049321 | 0.037697 | <i>SCN3A/SCN4A/SCN3B/SCN7A</i>                                                                                                                                                                                                                                                                                                                                    | 4     |
| CC       | GO:0098945 | Intrinsic component of presynaptic active zone membrane | 4/967     | 17/19,594  | 0.008377 | 0.049321 | 0.037697 | <i>P2RX1/ATP2B2/GPM6A/CDH10</i>                                                                                                                                                                                                                                                                                                                                   | 4     |
| CC       | GO:0030427 | Site of polarized growth                                | 16/967    | 167/19,594 | 0.008581 | 0.0499   | 0.03814  | <i>MAP2/OLFM1/PCDH9/MAPT/LRRK2/KIF5C/DSCAM/ELAVL4/ITGA4/STMN4/CNR1/SNAP25/NRSN1/GPM6A/ATCAY/CDK5R2</i>                                                                                                                                                                                                                                                            | 16    |
| MF       | GO:0003823 | Antigen binding                                         | 39/906    | 174/18,410 | 8.93E-16 | 7.23E-13 | 6.02E-13 | <i>GP2/FCN2/ITGA4/TRAV29DV5/IGKV2D-28/IGHV3-64/IGHV6-1/IGHV2-5/IGHV3-74/IGHV4-4/IGHV3-20/IGLV7-43/IGKV1D-39/IGHV3-7/IGHV3-15/IGKV1-39/IGHV1-45/JCHAIN/IGKV5-2/IGLV2-8/IGHV3-72/IGKV1-17/IGHV3-48/IGHV2-26/IGHV3-49/IGHV4-28/IGLV6-57/IGKV1-16/IGHV5-51/IGLV3-27/IGKV4-1/IGHV1-69/IGLV3-19/IGHV4-39/IGHV4-59/IGHA2/IGHV3-21/IGHV3-13/IGHV1-18</i>                  | 39    |
| MF       | GO:0022836 | Gated channel activity                                  | 55/906    | 340/18,410 | 4.95E-15 | 1.34E-12 | 1.11E-12 | <i>CHRN3/KCNK3/SCNN1B/P2RX1/PEX5L/KCNJ5/KCNA2/KCNAB1/KCNJ16/GABRB3/KCNH7/SCN3A/CACNB2/ANO5/KCNB1/ANO3/KCNA3/SCN4A/KCND3/CHRN2/SCNN1G/GRIK5/ABCC9/KCNV1/MCOLN3/KCNJ11/CACNA2D2/SCN3B/CNGA3/SCN7A/TRPM3/GLRA3/TMEM63C/CACNA1B/CACNG5/KCNA5/KCNJ3/KCNMB2/GRIA2/HCN4/CNR1/SNAP25/KCNB2/KCNG3/GRIA4/GABRA4/GABRG2/ABCC8/KCNH6/CFTR/KCNJ6/CLIC3/GLRA1/KCNK16/GABRA2</i> | 55    |
| MF       | GO:0046873 | Metal ion transmembrane transporter activity            | 63/906    | 428/18,410 | 4.95E-15 | 1.34E-12 | 1.11E-12 | <i>SLC1A2/KCNK3/SCNN1B/KCNJ5/KCNA2/KCNAB1/TRPM6/KCNJ16/SLC5A9/KCNH7/SLC8A3/SLC8A2/SCN3A/SLC30A2/CACNB2/KCNB1/SLC5A7/SLC6A4/SLC8A1/SLC5A4/TUSC3/KCNA3/SCN4A/KCND3/SLC4A4/SLC4A10/SCNN1G/GRIK5/ATP2B2/SLC17A4/ABCC9/KCNV1/SLC6A15/MCOLN3/SLC17A1/KCNJ11/</i>                                                                                                        | 63    |



Supplementary Table S1 (Continued)

| Ontology | ID         | Description                                | GeneRatio | BgRatio    | p-Value  | p.adjust | q-Value  | geneID                                                                                                                                                                                                                                                                                                                                                                                                                                                                            | Count |
|----------|------------|--------------------------------------------|-----------|------------|----------|----------|----------|-----------------------------------------------------------------------------------------------------------------------------------------------------------------------------------------------------------------------------------------------------------------------------------------------------------------------------------------------------------------------------------------------------------------------------------------------------------------------------------|-------|
|          |            |                                            |           |            |          |          |          | CACNA2D2/SCN3B/SCN7A/TRPM3/SLC18A2/<br>CACNA1B/CACNG5/ATP1A3/KCNA5/SLC5A8/KCNJ3/<br>KCNMB2/HCN4/CNR1/SNAP25/SLC10A2/KCNB2/<br>KCNG3/ATP4A/ABCC8/GPM6A/TRPV6/KCNH6/<br>SLC39A5/KCNJ6/KCNK16/SLC30A8                                                                                                                                                                                                                                                                                |       |
| MF       | GO:0022803 | Passive transmembrane transporter activity | 68/906    | 490/18,410 | 7.86E-15 | 1.59E-12 | 1.32E-12 | AQP8/CHRN3/KCNK3/SCNN1B/P2RX1/PEX5L/KCNJ5/<br>OTOP3/KCNA2/KCNAB1/AQP12B/TRPM6/KCNJ16/<br>GABRB3/AQP12A/KCNH7/SCN3A/CACNB2/ANO5/<br>KCNB1/ANO3/AQP4/KCNA3/SCN4A/UNC80/KCND3/<br>CHRN2/SCNN1G/GRIK5/ABCC9/KCNV1/MCOLN3/<br>KCNJ11/CACNA2D2/SCN3B/CNGA3/SCN7A/TRPM3/<br>GLRA3/TMEM63C/CACNA1B/CACNG5/KCNA5/<br>SLC5A8/KCNJ3/KCNMB2/GRIA2/HCN4/CNR1/SNAP25/<br>KCNB2/KCNG3/GRIA4/GABRA4/GABRG2/ABCC8/<br>GPM6A/TRPV6/KCNH6/CFTR/KCNJ6/GJD2/CLIC3/<br>GLRA1/KCNK16/GABRA2/SLC26A9/GJB4 | 68    |
| MF       | GO:0015267 | Channel activity                           | 67/906    | 489/18,410 | 2.35E-14 | 3.80E-12 | 3.16E-12 | AQP8/CHRN3/KCNK3/SCNN1B/P2RX1/PEX5L/KCNJ5/<br>OTOP3/KCNA2/KCNAB1/AQP12B/TRPM6/KCNJ16/<br>GABRB3/AQP12A/KCNH7/SCN3A/CACNB2/ANO5/<br>KCNB1/ANO3/AQP4/KCNA3/SCN4A/UNC80/KCND3/<br>CHRN2/SCNN1G/GRIK5/ABCC9/KCNV1/MCOLN3/<br>KCNJ11/CACNA2D2/SCN3B/CNGA3/SCN7A/TRPM3/<br>GLRA3/TMEM63C/CACNA1B/CACNG5/KCNA5/KCNJ3/<br>KCNMB2/GRIA2/HCN4/CNR1/SNAP25/KCNB2/KCNG3/<br>GRIA4/GABRA4/GABRG2/ABCC8/GPM6A/TRPV6/<br>KCNH6/CFTR/KCNJ6/GJD2/CLIC3/GLRA1/KCNK16/<br>GABRA2/SLC26A9/GJB4        | 67    |
| MF       | GO:0005216 | Ion channel activity                       | 61/906    | 442/18,410 | 2.58E-13 | 3.48E-11 | 2.90E-11 | CHRN3/KCNK3/SCNN1B/P2RX1/PEX5L/KCNJ5/<br>OTOP3/KCNA2/KCNAB1/TRPM6/KCNJ16/GABRB3/<br>KCNH7/SCN3A/CACNB2/ANO5/KCNB1/ANO3/KCNA3/<br>SCN4A/UNC80/KCND3/CHRN2/SCNN1G/GRIK5/<br>ABCC9/KCNV1/MCOLN3/KCNJ11/CACNA2D2/SCN3B/<br>CNGA3/SCN7A/TRPM3/GLRA3/TMEM63C/CACNA1B/<br>CACNG5/KCNA5/KCNJ3/KCNMB2/GRIA2/HCN4/CNR1/<br>SNAP25/KCNB2/KCNG3/GRIA4/GABRA4/GABRG2/<br>ABCC8/GPM6A/TRPV6/KCNH6/CFTR/KCNJ6/CLIC3/<br>GLRA1/KCNK16/GABRA2/SLC26A9                                              | 61    |
| MF       | GO:0034987 | Immunoglobulin receptor binding            | 23/906    | 80/18,410  | 2.96E-12 | 3.42E-10 | 2.85E-10 | IGHV3-64/IGHV6-1/IGHV2-5/IGHV3-74/IGHV4-4/<br>IGHV3-20/IGHV3-7/IGHV3-15/IGHV1-45/JCHAIN/<br>IGHV3-72/IGHV3-48/IGHV2-26/IGHV3-49/IGHV4-28/<br>IGHV5-51/IGHV1-69/IGHV4-39/IGHV4-59/IGHA2/<br>IGHV3-21/IGHV3-13/IGHV1-18                                                                                                                                                                                                                                                             | 23    |

(Continued)

Supplementary Table S1 (Continued)

| Ontology | ID         | Description                              | GeneRatio | BgRatio    | p-Value  | p.adjust | q-Value  | geneID                                                                                                                                                                                                                                                                                                                      | Count |
|----------|------------|------------------------------------------|-----------|------------|----------|----------|----------|-----------------------------------------------------------------------------------------------------------------------------------------------------------------------------------------------------------------------------------------------------------------------------------------------------------------------------|-------|
| MF       | GO:0005261 | Cation channel activity                  | 50/906    | 345/18,410 | 6.29E-12 | 6.36E-10 | 5.30E-10 | CHRN3/KCNK3/SCNN1B/P2RX1/PEX5L/KCNJ5/OTOP3/KCNA2/KCNAB1/TRPM6/KCNJ16/KCNH7/SCN3A/CACNB2/KCNB1/KCNA3/SCN4A/UNC80/KCND3/CHRN2/SCNN1G/GRIK5/ABCC9/KCNV1/MCOLN3/KCNJ11/CACNA2D2/SCN3B/CNGA3/SCN7A/TRPM3/TMEM63C/CACNA1B/CACNG5/KCNA5/KCNJ3/KCNMB2/GRIA2/HCN4/CNR1/SNAP25/KCNB2/KCNG3/GRIA4/ABCC8/GPM6A/TRPV6/KCNH6/KCNJ6/KCNK16 | 50    |
| MF       | GO:0015276 | Ligand-gated ion channel activity        | 28/906    | 145/18,410 | 4.26E-10 | 3.45E-08 | 2.87E-08 | CHRN3/SCNN1B/P2RX1/PEX5L/KCNJ5/KCNJ16/GABRB3/KCNH7/CHRN2/SCNN1G/GRIK5/ABCC9/MCOLN3/KCNJ11/CNGA3/GLRA3/KCNJ3/GRIA2/HCN4/GRIA4/GABRA4/GABRG2/ABCC8/KCNH6/CFTR/KCNJ6/GLRA1/GABRA2                                                                                                                                              | 28    |
| MF       | GO:0022834 | Ligand-gated channel activity            | 28/906    | 145/18,410 | 4.26E-10 | 3.45E-08 | 2.87E-08 | CHRN3/SCNN1B/P2RX1/PEX5L/KCNJ5/KCNJ16/GABRB3/KCNH7/CHRN2/SCNN1G/GRIK5/ABCC9/MCOLN3/KCNJ11/CNGA3/GLRA3/KCNJ3/GRIA2/HCN4/GRIA4/GABRA4/GABRG2/ABCC8/KCNH6/CFTR/KCNJ6/GLRA1/GABRA2                                                                                                                                              | 28    |
| MF       | GO:0005249 | Voltage-gated potassium channel activity | 21/906    | 91/18,410  | 2.26E-09 | 1.66E-07 | 1.39E-07 | KCNK3/KCNJ5/KCNA2/KCNAB1/KCNJ16/KCNH7/KCNB1/KCNA3/KCND3/ABCC9/KCNV1/KCNJ11/KCNA5/KCNJ3/HCN4/SNAP25/KCNB2/KCNG3/ABCC8/KCNH6/KCNJ6                                                                                                                                                                                            | 21    |
| MF       | GO:0005244 | Voltage-gated ion channel activity       | 32/906    | 201/18,410 | 4.00E-09 | 2.34E-07 | 1.95E-07 | KCNK3/KCNJ5/KCNA2/KCNAB1/KCNJ16/KCNH7/SCN3A/CACNB2/KCNB1/KCNA3/SCN4A/KCND3/ABCC9/KCNV1/KCNJ11/CACNA2D2/SCN3B/SCN7A/CACNA1B/CACNG5/KCNA5/KCNJ3/HCN4/CNR1/SNAP25/KCNB2/KCNG3/ABCC8/KCNH6/KCNJ6/CLIC3/KCNK16                                                                                                                   | 32    |
| MF       | GO:0022832 | Voltage-gated channel activity           | 32/906    | 201/18,410 | 4.00E-09 | 2.34E-07 | 1.95E-07 | KCNK3/KCNJ5/KCNA2/KCNAB1/KCNJ16/KCNH7/SCN3A/CACNB2/KCNB1/KCNA3/SCN4A/KCND3/ABCC9/KCNV1/KCNJ11/CACNA2D2/SCN3B/SCN7A/CACNA1B/CACNG5/KCNA5/KCNJ3/HCN4/CNR1/SNAP25/KCNB2/KCNG3/ABCC8/KCNH6/KCNJ6/CLIC3/KCNK16                                                                                                                   | 32    |
| MF       | GO:0005267 | Potassium channel activity               | 24/906    | 121/18,410 | 4.29E-09 | 2.34E-07 | 1.95E-07 | KCNK3/KCNJ5/KCNA2/KCNAB1/KCNJ16/KCNH7/KCNB1/KCNA3/KCND3/GRIK5/ABCC9/KCNV1/KCNJ11/KCNA5/KCNJ3/KCNMB2/HCN4/SNAP25/KCNB2/KCNG3/ABCC8/KCNH6/KCNJ6/KCNK16                                                                                                                                                                        | 24    |
| MF       | GO:0008236 | Serine-type peptidase activity           | 31/906    | 191/18,410 | 4.35E-09 | 2.34E-07 | 1.95E-07 | CTRL/CELA2B/CELA2A/CTRC/CELA3B/F11/CELA3A/RELN/PRSS1/CTRB2/CTRB1/CMA1/LPA/DPP10/CLKB1/PRSS2/TLL1/CLK1/CTSG/HPN/PCSK1/DPP6/PCSK2/                                                                                                                                                                                            | 31    |

**Supplementary Table S1** (Continued)

| Ontology | ID         | Description                                      | GeneRatio | BgRatio    | p-Value  | p.adjust | q-Value  | geneID                                                                                                                                                                              | Count |
|----------|------------|--------------------------------------------------|-----------|------------|----------|----------|----------|-------------------------------------------------------------------------------------------------------------------------------------------------------------------------------------|-------|
|          |            |                                                  |           |            |          |          |          | MMP11/GZMK/HABP2/KLK13/PRSS3/TMPRSS4/KLK2/KLK8                                                                                                                                      |       |
| MF       | GO:0017171 | Serine hydrolase activity                        | 31/906    | 195/18,410 | 7.24E-09 | 3.66E-07 | 3.05E-07 | CTRL/CELA2B/CELA2A/CTRC/CELA3B/F11/CELA3A/RELN/PRSS1/CTRB2/CTRB1/CMA1/LPA/DPP10/KLKB1/PRSS2/TLL1/KLK1/CTSG/HPN/PCSK1/DPP6/PCSK2/MMP11/GZMK/HABP2/KLK13/PRSS3/TMPRSS4/KLK2/KLK8      | 31    |
| MF       | GO:0022843 | Voltage-gated cation channel activity            | 26/906    | 144/18,410 | 7.90E-09 | 3.76E-07 | 3.13E-07 | KCNK3/KCNJ5/KCNA2/KCNAB1/KCNJ16/KCNH7/CACNB2/KCNB1/KCNA3/KCND3/ABCC9/KCNV1/KCNJ11/CACNA2D2/CACNA1B/CACNG5/KCNA5/KCNJ3/HCN4/CNR1/SNAP25/KCNB2/KCNG3/ABCC8/KCNH6/KCNJ6                | 26    |
| MF       | GO:0015081 | Sodium ion transmembrane transporter activity    | 26/906    | 150/18,410 | 1.91E-08 | 8.57E-07 | 7.14E-07 | SLC1A2/SCNN1B/SLC5A9/SLC8A3/SLC8A2/SCN3A/SLC5A7/SLC6A4/SLC8A1/SLC5A4/SCN4A/SLC4A4/SLC4A10/SCNN1G/GRIK5/SLC17A4/SLC6A15/SLC17A1/SCN3B/SCN7A/SLC18A2/ATP1A3/SLC5A8/HCN4/SLC10A2/ATP4A | 26    |
| MF       | GO:0004252 | Serine-type endopeptidase activity               | 28/906    | 174/18,410 | 2.93E-08 | 1.25E-06 | 1.04E-06 | CTRL/CELA2B/CELA2A/CTRC/CELA3B/F11/CELA3A/PRSS1/CTRB2/CTRB1/CMA1/LPA/KLKB1/PRSS2/TLL1/KLK1/CTSG/HPN/PCSK1/PCSK2/MMP11/GZMK/HABP2/KLK13/PRSS3/TMPRSS4/KLK2/KLK8                      | 28    |
| MF       | GO:0015079 | Potassium ion transmembrane transporter activity | 26/906    | 154/18,410 | 3.34E-08 | 1.35E-06 | 1.12E-06 | KCNK3/KCNJ5/KCNA2/KCNAB1/KCNJ16/KCNH7/KCNB1/KCNA3/KCND3/GRIK5/ABCC9/KCNV1/KCNJ11/ATP1A3/KCNA5/KCNJ3/KCNMB2/HCN4/SNAP25/KCNB2/KCNG3/ATP4A/ABCC8/KCNH6/KCNJ6/KCNK16                   | 26    |
| MF       | GO:0008528 | G protein-coupled peptide receptor activity      | 25/906    | 148/18,410 | 6.05E-08 | 2.33E-06 | 1.94E-06 | GRPR/VIPR2/CX3CR1/SORCS1/UTS2R/GPR37/TACR1/NPY5R/GALR1/TSHR/CYSLTR1/CCR2/CCKBR/PRLHR/CXCR6/SSTR2/CCR5/AVPR1B/NPY1R/AGTR2/SSTR3/GLP1R/XCR1/CXCR5/SCTR                                | 25    |
| MF       | GO:0001653 | Peptide receptor activity                        | 25/906    | 154/18,410 | 1.35E-07 | 4.95E-06 | 4.12E-06 | GRPR/VIPR2/CX3CR1/SORCS1/UTS2R/GPR37/TACR1/NPY5R/GALR1/TSHR/CYSLTR1/CCR2/CCKBR/PRLHR/CXCR6/SSTR2/CCR5/AVPR1B/NPY1R/AGTR2/SSTR3/GLP1R/XCR1/CXCR5/SCTR                                | 25    |
| MF       | GO:0099094 | Ligand-gated cation channel activity             | 21/906    | 115/18,410 | 1.76E-07 | 6.17E-06 | 5.14E-06 | CHRN3/SCNN1B/P2RX1/PEX5L/KCNJ5/KCNJ16/KCNH7/CHRN2/SCNN1G/GRIK5/ABCC9/MCOLN3/KCNJ11/CNGA3/KCNJ3/GRIA2/HCN4/GRIA4/ABCC8/KCNH6/KCNJ6                                                   | 21    |
| MF       | GO:0005539 | Glycosaminoglycan binding                        | 30/906    | 234/18,410 | 1.56E-06 | 5.25E-05 | 4.37E-05 | CEL/F11/RTN4RL1/REG3G/TGFBR3/REG1B/LPA/REG3A/SELP/VTN/REG1A/CTSG/APOH/SFRP1/COL25A1/TNXB/APLP1/SERPINA10/PTPRC/THBS4/                                                               | 30    |

(Continued)

Supplementary Table S1 (Continued)

| Ontology | ID         | Description                                   | GeneRatio | BgRatio    | p-Value  | p.adjust | q-Value  | geneID                                                                                                                                                                                                                                                    | Count |
|----------|------------|-----------------------------------------------|-----------|------------|----------|----------|----------|-----------------------------------------------------------------------------------------------------------------------------------------------------------------------------------------------------------------------------------------------------------|-------|
|          |            |                                               |           |            |          |          |          | HABP2/FGF10/VIT/EPYC/COL11A1/JCHAIN/PLA2G2D/SERPINA5/FGFBP1/ZG16                                                                                                                                                                                          |       |
| MF       | GO:0005242 | Inward rectifier potassium channel activity   | 9/906     | 27/18,410  | 3.42E-06 | 0.000111 | 9.21E-05 | KCNJ5/KCNJ16/KCNH7/ABCC9/KCNJ11/KCNJ3/ABCC8/KCNH6/KCNJ6                                                                                                                                                                                                   | 9     |
| MF       | GO:0005179 | Hormone activity                              | 19/906    | 122/18,410 | 7.88E-06 | 0.000245 | 0.000204 | SPX/GPHA2/KL/VIP/EPO/CARTPT/ENHO/GHRL/ADCYAP1/CHGB/IGF1/ADIPOQ/NPY/GUCA2A/TTR/PPY/UCN3/SST/IAPP                                                                                                                                                           | 19    |
| MF       | GO:0005201 | Extracellular matrix structural constituent   | 23/906    | 172/18,410 | 1.26E-05 | 0.000378 | 0.000314 | UMOD/GP2/ENAM/LAMB4/MMRN1/SBSPON/VTN/COL21A1/TFPI2/COL25A1/TNXB/ABI3BP/COL14A1/OGN/COL7A1/FGA/COL19A1/ADIPOQ/FGB/COL11A1/COL17A1/MUC6/FGG                                                                                                                 | 23    |
| MF       | GO:0099095 | Ligand-gated anion channel activity           | 7/906     | 18/18,410  | 1.35E-05 | 0.000389 | 0.000324 | GABRB3/GLRA3/GABRA4/GABRG2/CFTR/GLRA1/GABRA2                                                                                                                                                                                                              | 7     |
| MF       | GO:0048018 | Receptor ligand activity                      | 46/906    | 489/18,410 | 2.01E-05 | 0.00056  | 0.000466 | SPX/C5/GPHA2/PDGFD/FGF12/KL/VIP/SEMA6D/EPO/CARTPT/FLRT2/GDF10/FASLG/NRG2/ENHO/EGF/GHRL/GDF7/ADCYAP1/REG1A/CTSG/SEMA3E/IL33/CCL14/TNFSF9/VEGFD/CXCL12/OGN/CHGB/SCG2/THBS4/FGF10/IGF1/ADIPOQ/NPY/GUCA2A/BMP5/TTR/CCL21/CXCL9/PPY/UCN3/SST/LEFTY1/IAPP/CCL19 | 46    |
| MF       | GO:0022853 | Active ion transmembrane transporter activity | 29/906    | 254/18,410 | 2.24E-05 | 0.000604 | 0.000503 | SLC1A2/SLCO4C1/SLC5A9/SLC8A3/SLC8A2/SLC5A7/SLC6A4/SLC8A1/SLC5A4/SLCO1C1/SLC26A4/SLC4A4/SLC4A10/ATP2B2/SLC17A4/ABCC9/SLC6A15/SLC17A1/KCNJ11/SLC18A2/SLC22A9/ATP1A3/SLC5A8/SLC10A2/ATP4A/ABCC8/ATP13A4/CFTR/SLC26A9                                         | 29    |
| MF       | GO:0016247 | Channel regulator activity                    | 20/906    | 143/18,410 | 2.36E-05 | 0.000616 | 0.000513 | AMIGO1/KCNAB1/GLPD1/NOS1/FGF12/WNK2/DPP10/FXYD2/HPCAL4/NRXN1/AMBIP/ABCC9/KCNV1/SCN3B/CACNG5/DPP6/KCNMB2/PRKCB/CFTR/NPY                                                                                                                                    | 20    |
| MF       | GO:0030546 | Signaling receptor activator activity         | 46/906    | 496/18,410 | 2.86E-05 | 0.000724 | 0.000603 | SPX/C5/GPHA2/PDGFD/FGF12/KL/VIP/SEMA6D/EPO/CARTPT/FLRT2/GDF10/FASLG/NRG2/ENHO/EGF/GHRL/GDF7/ADCYAP1/REG1A/CTSG/SEMA3E/IL33/CCL14/TNFSF9/VEGFD/CXCL12/OGN/CHGB/SCG2/THBS4/FGF10/IGF1/ADIPOQ/NPY/GUCA2A/BMP5/TTR/CCL21/CXCL9/PPY/UCN3/SST/LEFTY1/IAPP/CCL19 | 46    |
| MF       | GO:0015370 | Solute:sodium symporter activity              | 13/906    | 72/18,410  | 4.34E-05 | 0.001065 | 0.000887 | SLC1A2/SLC5A9/SLC5A7/SLC6A4/SLC5A4/SLC4A4/SLC4A10/SLC17A4/SLC6A15/SLC17A1/SLC18A2/SLC5A8/SLC10A2                                                                                                                                                          | 13    |
| MF       | GO:0099106 | Ion channel regulator activity                | 19/906    | 138/18,410 | 4.67E-05 | 0.001083 | 0.000902 | AMIGO1/KCNAB1/GLPD1/NOS1/FGF12/WNK2/DPP10/FXYD2/HPCAL4/NRXN1/AMBIP/ABCC9/KCNV1/SCN3B/DPP6/KCNMB2/PRKCB/CFTR/NPY                                                                                                                                           | 19    |

**Supplementary Table S1** (Continued)

| Ontology | ID         | Description                                         | GeneRatio | BgRatio    | p-Value  | p.adjust | q-Value  | geneID                                                                                                                                                                                                                                                                                     | Count |
|----------|------------|-----------------------------------------------------|-----------|------------|----------|----------|----------|--------------------------------------------------------------------------------------------------------------------------------------------------------------------------------------------------------------------------------------------------------------------------------------------|-------|
| MF       | GO:0070492 | Oligosaccharide binding                             | 6/906     | 15/18,410  | 4.77E-05 | 0.001083 | 0.000902 | REG3G/REG1B/REG3A/SELP/REG1A/SELE                                                                                                                                                                                                                                                          | 6     |
| MF       | GO:0022804 | Active transmembrane transporter activity           | 39/906    | 404/18,410 | 4.82E-05 | 0.001083 | 0.000902 | SLC1A2/ABCB1/ABCA3/SLC16A12/SLCO4C1/SLC6A16/SLC5A9/SLC8A3/SLC8A2/ABCD2/SLC5A7/SLC6A4/SLC8A1/SLC5A4/SLC38A3/SLCO1C1/SLC26A4/SLC4A4/SLC4A10/ATP2B2/SLC17A4/ABCC9/SLC6A15/SLC17A1/SLC29A4/KCNJ11/ABCA8/SLC18A2/SLC22A9/SLC38A4/ATP1A3/SLC5A8/SLC10A2/ATP4A/ABCC8/ATP13A4/CFTR/SLC6A17/SLC26A9 | 39    |
| MF       | GO:0044325 | Transmembrane transporter binding                   | 18/906    | 127/18,410 | 4.98E-05 | 0.001088 | 0.000906 | KCNAB1/NOS1/AKAP6/FGF12/DPP10/KCNB1/SLC8A1/PIRT/KCND3/ABCC9/ANK2/LRRK2/KCNJ11/SCN3B/RIMS2/RIMS1/CASR/ABCC8                                                                                                                                                                                 | 18    |
| MF       | GO:0008188 | Neuropeptide receptor activity                      | 10/906    | 45/18,410  | 5.25E-05 | 0.001118 | 0.000931 | GRPR/SORCS1/GPR37/TACR1/NPY5R/GALR1/PRLHR/SSTR2/NPY1R/SSTR3                                                                                                                                                                                                                                | 10    |
| MF       | GO:0015291 | Secondary active transmembrane transporter activity | 27/906    | 240/18,410 | 5.49E-05 | 0.00114  | 0.000949 | SLC1A2/SLC16A12/SLCO4C1/SLC6A16/SLC5A9/SLC8A3/SLC8A2/SLC5A7/SLC6A4/SLC8A1/SLC5A4/SLC38A3/SLCO1C1/SLC26A4/SLC4A4/SLC4A10/SLC17A4/SLC6A15/SLC17A1/SLC18A2/SLC22A9/SLC38A4/ATP1A3/SLC5A8/SLC10A2/SLC6A17/SLC26A9                                                                              | 27    |
| MF       | GO:0008201 | Heparin binding                                     | 21/906    | 168/18,410 | 8.09E-05 | 0.001635 | 0.001362 | CEL/F11/RTN4RL1/TGFBR3/LPA/SELP/VTN/CTSG/APOH/SFRP1/COL25A1/TNXB/APLP1/SERPINA10/PTPRC/THBS4/FGF10/COL11A1/PLA2G2D/SERPINA5/FGFBP1                                                                                                                                                         | 21    |
| MF       | GO:0019957 | C-C chemokine binding                               | 7/906     | 24/18,410  | 0.000113 | 0.002231 | 0.001858 | CX3CR1/CCR2/CXCR6/CCR5/ACKR1/XCR1/CXCR5                                                                                                                                                                                                                                                    | 7     |
| MF       | GO:0042923 | Neuropeptide binding                                | 8/906     | 32/18,410  | 0.000122 | 0.002351 | 0.001958 | GRPR/GPR37/NPY5R/GALR1/PRLHR/SSTR2/NPY1R/SSTR3                                                                                                                                                                                                                                             | 8     |
| MF       | GO:1901681 | Sulfur compound binding                             | 28/906    | 267/18,410 | 0.000138 | 0.002592 | 0.002159 | GNMT/CEL/ACACB/P2RX1/F11/RTN4RL1/TGFBR3/ACADL/LPA/SELP/VTN/OGDHL/CTSG/APOH/SFRP1/COL25A1/TNXB/APLP1/SERPINA10/CBS/PTPRC/THBS4/FGF10/GLRA1/COL11A1/PLA2G2D/SERPINA5/FGFBP1                                                                                                                  | 28    |
| MF       | GO:0022824 | Transmitter-gated ion channel activity              | 11/906    | 60/18,410  | 0.000144 | 0.002594 | 0.00216  | CHRN3/GABRB3/CHRN2/GRIK5/GLRA3/GRIA2/GRIA4/GABRA4/GABRG2/GLRA1/GABRA2                                                                                                                                                                                                                      | 11    |
| MF       | GO:0022835 | Transmitter-gated channel activity                  | 11/906    | 60/18,410  | 0.000144 | 0.002594 | 0.00216  | CHRN3/GABRB3/CHRN2/GRIK5/GLRA3/GRIA2/GRIA4/GABRA4/GABRG2/GLRA1/GABRA2                                                                                                                                                                                                                      | 11    |
| MF       | GO:0019956 | Chemokine binding                                   | 8/906     | 33/18,410  | 0.000154 | 0.00268  | 0.002231 | CX3CR1/CCR2/ITGA4/CXCR6/CCR5/ACKR1/XCR1/CXCR5                                                                                                                                                                                                                                              | 8     |

(Continued)

Supplementary Table S1 (Continued)

| Ontology | ID         | Description                                                | GeneRatio | BgRatio    | p-Value  | p.adjust | q-Value  | geneID                                                                                                                                                                                   | Count |
|----------|------------|------------------------------------------------------------|-----------|------------|----------|----------|----------|------------------------------------------------------------------------------------------------------------------------------------------------------------------------------------------|-------|
| MF       | GO:0042834 | Peptidoglycan binding                                      | 6/906     | 18/18,410  | 0.000156 | 0.00268  | 0.002231 | REG3G/REG1B/REG3A/REG1A/JCHAIN/ZG16                                                                                                                                                      | 6     |
| MF       | GO:0005230 | Extracellular ligand-gated ion channel activity            | 12/906    | 73/18,410  | 0.000215 | 0.003631 | 0.003024 | CHRN3/P2RX1/GABRB3/CHRN2/GRIK5/GLRA3/GRIA2/GRIA4/GABRA4/GABRG2/GLRA1/GABRA2                                                                                                              | 12    |
| MF       | GO:0015293 | Symporter activity                                         | 18/906    | 144/18,410 | 0.000255 | 0.004208 | 0.003504 | SLC1A2/SLC16A12/SLC6A16/SLC5A9/SLC5A7/SLC6A4/SLC5A4/SLC38A3/SLC4A4/SLC4A10/SLC17A4/SLC6A15/SLC17A1/SLC18A2/SLC38A4/SLC5A8/SLC10A2/SLC6A17                                                | 18    |
| MF       | GO:0017075 | Syntaxin-1 binding                                         | 6/906     | 20/18,410  | 0.000299 | 0.004832 | 0.004024 | SYBU/SLC6A4/UNC13A/LRRK2/SNAP25/CPLX2                                                                                                                                                    | 6     |
| MF       | GO:0015108 | Chloride transmembrane transporter activity                | 14/906    | 99/18,410  | 0.00034  | 0.005309 | 0.004421 | GABRB3/ANO5/SLC6A4/ANO3/SLC26A4/GLRA3/SLC18A2/GABRA4/GABRG2/CFTR/CLIC3/GLRA1/GABRA2/SLC26A9                                                                                              | 14    |
| MF       | GO:0031406 | Carboxylic acid binding                                    | 20/906    | 173/18,410 | 0.000341 | 0.005309 | 0.004421 | GNMT/PLA2G1B/ACACB/NOS1/ALB/ST8SIA3/SELP/AFM/GLRA3/SELE/RBP2/SIGLEC6/GAD2/NR1H4/ADIPOQ/GLRA1/PMP2/FABP4/SERPINA5/PCK1                                                                    | 20    |
| MF       | GO:0015271 | Outward rectifier potassium channel activity               | 5/906     | 14/18,410  | 0.000394 | 0.006011 | 0.005005 | KCNA2/KCNB1/KCNA3/KCND3/KCNA5                                                                                                                                                            | 5     |
| MF       | GO:0015103 | Inorganic anion transmembrane transporter activity         | 18/906    | 151/18,410 | 0.000458 | 0.00686  | 0.005713 | GABRB3/ANO5/SLC6A4/ANO3/SLC26A4/SLC4A4/SLC4A10/ABCC9/SLC17A1/GLRA3/SLC18A2/GABRA4/GABRG2/CFTR/CLIC3/GLRA1/GABRA2/SLC26A9                                                                 | 18    |
| MF       | GO:0005237 | Inhibitory extracellular ligand-gated ion channel activity | 5/906     | 15/18,410  | 0.000567 | 0.008338 | 0.006943 | GLRA3/GABRA4/GABRG2/GLRA1/GABRA2                                                                                                                                                         | 5     |
| MF       | GO:0042277 | Peptide binding                                            | 30/906    | 322/18,410 | 0.000626 | 0.00905  | 0.007536 | GRPR/VIPR2/PEX5L/NLGN1/CLU/CD36/CMA1/GPR37/NPY5R/PRLR/GALR1/CRHBP/ANPEP/TRHDE/CCKBR/COL25A1/PRLHR/MAPK8IP2/CACNA1B/SSTR2/ATP1A3/AVPR1B/TRAV29DV5/GRIA2/NPY1R/GRIA4/SSTR3/GLP1R/SCTR/IAPP | 30    |
| MF       | GO:0019905 | Syntaxin binding                                           | 11/906    | 71/18,410  | 0.000659 | 0.009353 | 0.007788 | SYBU/SYT6/SLC6A4/UNC13A/LRRK2/STXB5L/SYT9/SNAP25/CPLX2/SYT5/SYT8                                                                                                                         | 11    |
| MF       | GO:0016493 | C-C chemokine receptor activity                            | 6/906     | 23/18,410  | 0.000685 | 0.009559 | 0.00796  | CX3CR1/CCR2/CXCR6/CCR5/XCR1/CXCR5                                                                                                                                                        | 6     |
| MF       | GO:0004896 | Cytokine receptor activity                                 | 13/906    | 97/18,410  | 0.00092  | 0.012458 | 0.010374 | LIFR/CX3CR1/FLT3/IL12RB2/PRLR/IL5RA/CCR2/GFRA1/CXCR6/CCR5/GFRA3/XCR1/CXCR5                                                                                                               | 13    |
| MF       | GO:0008509 | Anion transmembrane transporter activity                   | 29/906    | 315/18,410 | 0.000924 | 0.012458 | 0.010374 | SLC1A2/SLC16A12/SLC7A2/SLC04C1/CD36/GABRB3/ANO5/SLC6A4/ANO3/SLC38A3/SLC01C1/SLC2A2/SLC26A4/SLC4A4/SLC4A10/ABCC9/SLC17A1/GLRA3/                                                           | 29    |

**Supplementary Table S1** (Continued)

| Ontology | ID         | Description                                         | GeneRatio | BgRatio    | p-Value  | p.adjust | q-Value  | geneID                                                                                                                                                                                                                 | Count |
|----------|------------|-----------------------------------------------------|-----------|------------|----------|----------|----------|------------------------------------------------------------------------------------------------------------------------------------------------------------------------------------------------------------------------|-------|
|          |            |                                                     |           |            |          |          |          | <i>SLC18A2/SLC22A9/SLC3A1/SLC5A8/GABRA4/GABRG2/CFTR/CLIC3/GLRA1/GABRA2/SLC26A9</i>                                                                                                                                     |       |
| MF       | GO:0005254 | Chloride channel activity                           | 11/906    | 74/18,410  | 0.000941 | 0.012479 | 0.010392 | <i>GABRB3/ANO5/ANO3/GLRA3/GABRA4/GABRG2/CFTR/CLIC3/GLRA1/GABRA2/SLC26A9</i>                                                                                                                                            | 11    |
| MF       | GO:0000149 | SNARE binding                                       | 14/906    | 110/18,410 | 0.000999 | 0.01304  | 0.010859 | <i>SYBU/SYT6/KCNB1/SLC6A4/SYT4/UNC13A/LRRK2/STXBPSL/SYT9/SNAP25/SNAP91/CPLX2/SYT5/SYT8</i>                                                                                                                             | 14    |
| MF       | GO:0042562 | Hormone binding                                     | 12/906    | 87/18,410  | 0.001108 | 0.014223 | 0.011844 | <i>VIPR2/MTNR1A/AMHR2/PRLR/GALR1/CRHBP/CCKBR/ATP1A3/AVPR1B/GLP1R/TTR/SCTR</i>                                                                                                                                          | 12    |
| MF       | GO:0005342 | Organic acid transmembrane transporter activity     | 18/906    | 165/18,410 | 0.001304 | 0.016482 | 0.013725 | <i>SLC1A2/ABCB1/SLC16A12/SLC7A2/CD36/SLC38A3/SLC01C1/SLC26A4/SLC6A15/SLC7A14/SLC29A4/SLC38A11/SLC22A9/SLC3A1/SLC38A4/SLC5A8/SLC10A2/SLC26A9</i>                                                                        | 18    |
| MF       | GO:0001637 | G protein-coupled chemoattractant receptor activity | 6/906     | 26/18,410  | 0.001378 | 0.016886 | 0.014061 | <i>CX3CR1/CCR2/CXCR6/CCR5/XCR1/CXCR5</i>                                                                                                                                                                               | 6     |
| MF       | GO:0004950 | Chemokine receptor activity                         | 6/906     | 26/18,410  | 0.001378 | 0.016886 | 0.014061 | <i>CX3CR1/CCR2/CXCR6/CCR5/XCR1/CXCR5</i>                                                                                                                                                                               | 6     |
| MF       | GO:0042626 | Atpase-coupled transmembrane transporter activity   | 12/906    | 90/18,410  | 0.001495 | 0.018055 | 0.015035 | <i>ABCB1/ABCA3/ABCD2/ATP2B2/ABCC9/KCNJ11/ABCA8/ATP1A3/ATP4A/ABCC8/ATP13A4/CFTR</i>                                                                                                                                     | 12    |
| MF       | GO:0033218 | Amide binding                                       | 34/906    | 402/18,410 | 0.001543 | 0.018359 | 0.015289 | <i>GNMT/GRPR/ACACB/VIPR2/P2RX1/PEX5L/NLGN1/CLU/CD36/CMA1/ACADL/GPR37/NPY5R/PRLR/GALR1/CRHBP/ANPEP/TRHDE/CCKBR/COL25A1/PRLHR/MAPK8IP2/CACNA1B/SSTR2/ATP1A3/AVPR1B/TRAV29DV5/GRIA2/NPY1R/GRIA4/SSTR3/GLP1R/SCTR/IAPP</i> | 34    |
| MF       | GO:0005272 | Sodium channel activity                             | 8/906     | 46/18,410  | 0.001646 | 0.019297 | 0.01607  | <i>SCNN1B/SCN3A/SCN4A/SCNN1G/GRIK5/SCN3B/SCN7A/HCN4</i>                                                                                                                                                                | 8     |
| MF       | GO:0015294 | Solute:cation symporter activity                    | 13/906    | 104/18,410 | 0.001763 | 0.020371 | 0.016964 | <i>SLC1A2/SLC5A9/SLC5A7/SLC6A4/SLC5A4/SLC4A4/SLC4A10/SLC17A4/SLC6A15/SLC17A1/SLC18A2/SLC5A8/SLC10A2</i>                                                                                                                | 13    |
| MF       | GO:0005326 | Neurotransmitter transmembrane transporter activity | 5/906     | 19/18,410  | 0.001863 | 0.020641 | 0.017189 | <i>SLC6A16/SLC6A4/SLC18A3/SLC6A15/SLC29A4</i>                                                                                                                                                                          | 5     |
| MF       | GO:0030506 | Ankyrin binding                                     | 5/906     | 19/18,410  | 0.001863 | 0.020641 | 0.017189 | <i>NRCAM/SPTB/SLC8A1/KCNJ11/PTPRC</i>                                                                                                                                                                                  | 5     |
| MF       | GO:0051428 | Peptide hormone receptor binding                    | 5/906     | 19/18,410  | 0.001863 | 0.020641 | 0.017189 | <i>GPHA2/VIP/ADCYAP1/GNAO1/UCN3</i>                                                                                                                                                                                    | 5     |
| MF       | GO:0030276 | Clathrin binding                                    | 10/906    | 69/18,410  | 0.001927 | 0.02107  | 0.017545 |                                                                                                                                                                                                                        | 10    |

(Continued)



Supplementary Table S1 (Continued)

| Ontology | ID         | Description                                                             | GeneRatio | BgRatio    | p-Value  | p.adjust | q-Value  | geneID                                                                                                                                                   | Count |
|----------|------------|-------------------------------------------------------------------------|-----------|------------|----------|----------|----------|----------------------------------------------------------------------------------------------------------------------------------------------------------|-------|
|          |            |                                                                         |           |            |          |          |          | <i>SYT6/DNAJC6/NSG2/SYT4/LRRK2/SYT9/SNAP91/SYT5/CALY/SYT8</i>                                                                                            |       |
| MF       | GO:0030165 | PDZ domain binding                                                      | 11/906    | 82/18,410  | 0.002208 | 0.023815 | 0.019832 | <i>SNTG2/NLGN1/TGFBR3/CXXC4/GPR37/PDZK1/GRIK5/ATP2B2/SHISA9/SSTR2/CFTR</i>                                                                               | 11    |
| MF       | GO:0022851 | GABA-gated chloride ion channel activity                                | 4/906     | 13/18,410  | 0.002915 | 0.030514 | 0.02541  | <i>GABRB3/GABRA4/GABRG2/GABRA2</i>                                                                                                                       | 4     |
| MF       | GO:0001614 | Purinergic nucleotide receptor activity                                 | 5/906     | 21/18,410  | 0.003004 | 0.030514 | 0.02541  | <i>P2RX1/P2RY12/P2RY13/GPR34/GPR87</i>                                                                                                                   | 5     |
| MF       | GO:0016502 | Nucleotide receptor activity                                            | 5/906     | 21/18,410  | 0.003004 | 0.030514 | 0.02541  | <i>P2RX1/P2RY12/P2RY13/GPR34/GPR87</i>                                                                                                                   | 5     |
| MF       | GO:0005184 | Neuropeptide hormone activity                                           | 6/906     | 30/18,410  | 0.003004 | 0.030514 | 0.02541  | <i>SPX/VIP/CARTPT/ADCYAP1/NPY/PPY</i>                                                                                                                    | 6     |
| MF       | GO:0046943 | Carboxylic acid transmembrane transporter activity                      | 17/906    | 164/18,410 | 0.003017 | 0.030514 | 0.02541  | <i>SLC1A2/ABCB1/SLC16A12/SLC7A2/CD36/SLC38A3/SLC01C1/SLC26A4/SLC6A15/SLC7A14/SLC38A11/SLC22A9/SLC3A1/SLC38A4/SLC5A8/SLC10A2/SLC26A9</i>                  | 17    |
| MF       | GO:0030594 | Neurotransmitter receptor activity                                      | 13/906    | 111/18,410 | 0.00316  | 0.031561 | 0.026282 | <i>CHRN3/GABRB3/CHRM3/CHRN2/GRIK5/GLRA3/CHRM2/GRIA2/GRIA4/GABRA4/GABRG2/GLRA1/GABRA2</i>                                                                 | 13    |
| MF       | GO:0005253 | Anion channel activity                                                  | 11/906    | 87/18,410  | 0.003537 | 0.03455  | 0.028771 | <i>GABRB3/ANO5/ANO3/GLRA3/GABRA4/GABRG2/CFTR/CLIC3/GLRA1/GABRA2/SLC26A9</i>                                                                              | 11    |
| MF       | GO:0030020 | Extracellular matrix structural constituent conferring tensile strength | 7/906     | 41/18,410  | 0.003545 | 0.03455  | 0.028771 | <i>COL21A1/COL25A1/COL14A1/COL7A1/COL19A1/COL11A1/COL17A1</i>                                                                                            | 7     |
| MF       | GO:0017046 | Peptide hormone binding                                                 | 8/906     | 52/18,410  | 0.003662 | 0.035102 | 0.029231 | <i>VIPR2/PRLR/GALR1/CRHBP/CCKBR/AVPR1B/GLP1R/SCTR</i>                                                                                                    | 8     |
| MF       | GO:0015106 | Bicarbonate transmembrane transporter activity                          | 5/906     | 22/18,410  | 0.003732 | 0.035102 | 0.029231 | <i>SLC26A4/SLC4A4/SLC4A10/CFTR/SLC26A9</i>                                                                                                               | 5     |
| MF       | GO:0033691 | Sialic acid binding                                                     | 5/906     | 22/18,410  | 0.003732 | 0.035102 | 0.029231 | <i>ST8SIA3/SELP/SELE/SIGLEC6/ADIPOQ</i>                                                                                                                  | 5     |
| MF       | GO:0030246 | Carbohydrate binding                                                    | 24/906    | 270/18,410 | 0.003846 | 0.035748 | 0.029769 | <i>REG3G/REG1B/REG3A/ATRNL1/DCDC1/SELP/VTN/GALNT16/FCN2/CLEC9A/REG1A/NOMO3/CNTN2/FREM1/SELE/LGALS2/CLEC10A/CRYBG2/SIGLEC6/GCK/CLEC17A/KRT1/APCS/ZG16</i> | 24    |
| MF       | GO:0045028 | G protein-coupled purinergic nucleotide receptor activity               | 4/906     | 14/18,410  | 0.003923 | 0.035748 | 0.029769 | <i>P2RY12/P2RY13/GPR34/GPR87</i>                                                                                                                         | 4     |

**Supplementary Table S1** (Continued)

| Ontology | ID         | Description                                                                                              | GeneRatio | BgRatio    | p-Value  | p.adjust | q-Value  | geneID                                                                                                                                                                                                     | Count |
|----------|------------|----------------------------------------------------------------------------------------------------------|-----------|------------|----------|----------|----------|------------------------------------------------------------------------------------------------------------------------------------------------------------------------------------------------------------|-------|
| MF       | GO:0098960 | Postsynaptic neurotransmitter receptor activity                                                          | 9/906     | 64/18,410  | 0.003933 | 0.035748 | 0.029769 | <i>CHRNB3/CHRM3/CHRNB2/GRIK5/CHRM2/GABRA4/GABRG2/GLRA1/GABRA2</i>                                                                                                                                          | 9     |
| MF       | GO:0019955 | Cytokine binding                                                                                         | 15/906    | 141/18,410 | 0.004043 | 0.036346 | 0.030267 | <i>LIFR/CX3CR1/CD36/IL12RB2/TGFBR3/PRLR/KIT/IL5RA/CCR2/ITGA4/CXCR6/CCR5/ACKR1/XCR1/CXCR5</i>                                                                                                               | 15    |
| MF       | GO:0051427 | Hormone receptor binding                                                                                 | 6/906     | 32/18,410  | 0.004217 | 0.037492 | 0.031221 | <i>GPHA2/VIP/ADCYAP1/GNAO1/FABP4/UCN3</i>                                                                                                                                                                  | 6     |
| MF       | GO:0015459 | Potassium channel regulator activity                                                                     | 8/906     | 54/18,410  | 0.004646 | 0.04085  | 0.034018 | <i>AMIGO1/KCNAB1/WNK2/DPP10/ABCC9/KCNV1/DPP6/KCNMB2</i>                                                                                                                                                    | 8     |
| MF       | GO:0004175 | Endopeptidase activity                                                                                   | 34/906    | 432/18,410 | 0.004861 | 0.042289 | 0.035215 | <i>CTRL/CELA2B/CELA2A/CTRC/CELA3B/MMP24/F11/CELA3A/PRSS1/CTRB2/CTRB1/CMA1/LPA/KLKB1/PRSS2/TLL1/USP2/KLK1/CTSG/SFRP1/HPN/PCSK1/PCSK2/MMP11/GZMK/HABP2/KLK13/PRSS3/PAPPA2/MEP1B/TMPRSS4/KLK2/KLK8/CASP14</i> | 34    |
| MF       | GO:0005251 | Delayed rectifier potassium channel activity                                                             | 6/906     | 33/18,410  | 0.004944 | 0.042548 | 0.035431 | <i>KCNA2/KCNB1/KCNA3/KCNA5/KCNB2/KCNG3</i>                                                                                                                                                                 | 6     |
| MF       | GO:0005200 | Structural constituent of cytoskeleton                                                                   | 12/906    | 104/18,410 | 0.005052 | 0.042901 | 0.035725 | <i>EPB41L4B/SORBS2/SPTB/DMD/PRPH/ANK2/INA/CTNNA2/TUBB4A/ACTL6B/KRT16/KRT6B</i>                                                                                                                             | 12    |
| MF       | GO:0042043 | Neurexin family protein binding                                                                          | 4/906     | 15/18,410  | 0.005144 | 0.042901 | 0.035725 | <i>CEL/NLGN1/LRRTM2/CPE</i>                                                                                                                                                                                | 4     |
| MF       | GO:0086008 | Voltage-gated potassium channel activity involved in cardiac muscle cell action potential repolarization | 4/906     | 15/18,410  | 0.005144 | 0.042901 | 0.035725 | <i>KCNJ5/KCND3/KCNA5/KCNJ3</i>                                                                                                                                                                             | 4     |
| MF       | GO:0019829 | ATPase-coupled cation transmembrane transporter activity                                                 | 7/906     | 44/18,410  | 0.005319 | 0.043908 | 0.036564 | <i>ATP2B2/ABCC9/KCNJ11/ATP1A3/ATP4A/ABCC8/ATP13A4</i>                                                                                                                                                      | 7     |
| MF       | GO:0005248 | Voltage-gated sodium channel activity                                                                    | 5/906     | 24/18,410  | 0.005552 | 0.044914 | 0.037402 | <i>SCN3A/SCN4A/SCN3B/SCN7A/HCN4</i>                                                                                                                                                                        | 5     |
| MF       | GO:0019865 | Immunoglobulin binding                                                                                   | 5/906     | 24/18,410  | 0.005552 | 0.044914 | 0.037402 | <i>UMOD/AMBP/MS4A2/JCHAIN/MS4A1</i>                                                                                                                                                                        | 5     |
